# Supplementary material for: Identification of long non-coding RNAs involved in floral scent of Rosa hybrida
Source: Frontiers journal article supplement (doi:10.3389/fpls.2022.996474), 2022-10-04
Supplement: Data_Sheet_1.zip [file Data_Sheet_1.zip]

## Sheet: diff_lncRNA_anno_FPKM_0.5_mRNA_
LnRNA ID	Expression level of lncRNA / FPKM			Target gene ID	Annotation of Target gene	Expression level of target gene / FPKM			Prediction method
	EF	SF	LF			EF	SF	LF
TCONS_00000596	0	1.32668	7.48155	112163740	XM_024300012.1 Rosa chinensis uncharacterized LOC112163740	0.323731	1.71075	14.691	co_expression
TCONS_00000596	0	1.32668	7.48155	112164884	XM_024301229.1 Rosa chinensis nuclear transcription factor Y subunit A-7 transcript variant X1,	13.9697	14.0257	23.8188	co_expression
TCONS_00000596	0	1.32668	7.48155	112165075	XM_024301488.1 Rosa chinensis cysteine-rich receptor-like protein kinase 29	0	0.101281	3.24155	co_expression
TCONS_00000596	0	1.32668	7.48155	112165496	XM_024302040.1 Rosa chinensis N-acetyl-alpha-D-glucosaminyl L-malate synthase	0.148366	0.384592	2.1557	co_expression
TCONS_00000596	0	1.32668	7.48155	112165516	XM_024302096.1 Rosa chinensis notchless protein homolog	6.36201	3.46107	7.88515	co_location
TCONS_00000596	0	1.32668	7.48155	112165529	XM_024302075.1 Rosa chinensis transcription factor bHLH122-like	1.96799	5.94201	17.9383	co_expression
TCONS_00000596	0	1.32668	7.48155	112166037	XM_024302792.1 Rosa chinensis uncharacterized LOC112166037	0	0.002266	0.0495263	co_expression
TCONS_00000596	0	1.32668	7.48155	112167085	XM_024304052.1 Rosa chinensis probable inactive receptor kinase At5g53320	0	0.024663	0.397774	co_expression
TCONS_00000596	0	1.32668	7.48155	112167298	XR_002923693.1 Rosa chinensis uncharacterized LOC112167298 transcript variant X1, ncRNA	0.105481	0.409691	1.44642	co_expression
TCONS_00000596	0	1.32668	7.48155	112168006	XM_024305123.1 Rosa chinensis protein ALP1-like	0.00433933	0.0772543	0.820243	co_expression
TCONS_00000596	0	1.32668	7.48155	112168053	XM_024305167.1 Rosa chinensis protein trichome birefringence-like 41	1.42536	27.7782	249.527	co_expression
TCONS_00000596	0	1.32668	7.48155	112169084	XM_024306031.1 Rosa chinensis uncharacterized LOC112169084 transcript variant X1,	0.991314	0.516196	44.8082	co_expression
TCONS_00000596	0	1.32668	7.48155	112169116	XM_024306066.1 Rosa chinensis cyclin-D4-1-like	0.016488	1.58613	6.23566	co_expression
TCONS_00000596	0	1.32668	7.48155	112169498	XM_024306533.1 Rosa chinensis probable sucrose-phosphate synthase 4	1.93112	7.45649	19.1899	co_expression
TCONS_00000596	0	1.32668	7.48155	112169745	XM_024306797.1 Rosa chinensis probable sucrose-phosphate synthase 1	0.0671297	0.0644833	0.319766	co_expression
TCONS_00000596	0	1.32668	7.48155	112169999	XM_024307142.1 Rosa chinensis serine/threonine-protein kinase tricorner-like transcript variant X1,	2.08959	4.44175	10.4233	co_expression
TCONS_00000596	0	1.32668	7.48155	112171065	XM_024308307.1 Rosa chinensis 3-ketoacyl-CoA synthase 4-like	0	0.179035	0.799865	co_expression
TCONS_00000596	0	1.32668	7.48155	112171759	XM_024308892.1 Rosa chinensis putative nuclease HARBI1	0.011894	0.270879	2.65535	co_expression
TCONS_00000596	0	1.32668	7.48155	112172254	XM_024309523.1 Rosa chinensis TMV resistance protein N-like	0.0847203	0.0485943	0.909423	co_expression
TCONS_00000596	0	1.32668	7.48155	112172426	XM_024309769.1 Rosa chinensis sodium/hydrogen exchanger 3-like transcript variant X1,	3.24267	5.34385	9.82026	co_expression
TCONS_00000596	0	1.32668	7.48155	112172748	XM_024310218.1 Rosa chinensis non-functional pseudokinase ZED1-like	0.0172387	0	0.186937	co_expression
TCONS_00000596	0	1.32668	7.48155	112173029	XM_024310574.1 Rosa chinensis uncharacterized LOC112173029	0	0	0.0321437	co_expression
TCONS_00000596	0	1.32668	7.48155	112173643	XM_024311328.1 Rosa chinensis glutamate receptor 2.8-like	0.00627567	0.0197857	0.189439	co_expression
TCONS_00000596	0	1.32668	7.48155	112173892	XM_024311575.1 Rosa chinensis telomere repeat-binding factor 1-like transcript variant X1,	10.2073	10.8324	14.7933	co_expression
TCONS_00000596	0	1.32668	7.48155	112174261	XM_024311996.1 Rosa chinensis B3 domain-containing protein Os06g0194400-like transcript variant X1,	0.0950043	0.11995	0.444982	co_expression
TCONS_00000596	0	1.32668	7.48155	112174293	XM_024312067.1 Rosa chinensis protein NRT1/ PTR FAMILY 5.1	0.105484	0.695319	7.33738	co_expression
TCONS_00000596	0	1.32668	7.48155	112175081	XM_024312749.1 Rosa chinensis pentatricopeptide repeat-containing protein At3g53170 transcript variant X1,	5.71008	2.09616	1.41702	co_location
TCONS_00000596	0	1.32668	7.48155	112175347	XM_024313023.1 Rosa chinensis tetraspanin-10 transcript variant X1,	7.9224	25.2073	49.8064	co_expression
TCONS_00000596	0	1.32668	7.48155	112175702	XM_024313430.1 Rosa chinensis uncharacterized LOC112175702	1.61865	14.0676	106.959	co_expression
TCONS_00000596	0	1.32668	7.48155	112176521	XM_024314487.1 Rosa chinensis protein REVEILLE 7-like transcript variant X1,	3.5734	3.80186	13.4575	co_expression
TCONS_00000596	0	1.32668	7.48155	112176750	XM_024314808.1 Rosa chinensis vignain-like	0.953715	7.8616	478.003	co_expression
TCONS_00000596	0	1.32668	7.48155	112177362	XM_024315658.1 Rosa chinensis UPF0496 protein At3g49070 transcript variant X1,	0.404778	0.160405	15.7291	co_expression
TCONS_00000596	0	1.32668	7.48155	112177536	XM_024315823.1 Rosa chinensis alpha-N-acetylglucosaminidase transcript variant X1,	18.8766	13.8065	18.4821	co_location
TCONS_00000596	0	1.32668	7.48155	112177639	XM_024315914.1 Rosa chinensis polyamine oxidase 1 transcript variant X1,	0.141783	0	0.0203137	co_location
TCONS_00000596	0	1.32668	7.48155	112177663	XM_024315931.1 Rosa chinensis probable glycosyltransferase STELLO2	2.47853	0	0.030544	co_location
TCONS_00000596	0	1.32668	7.48155	112178409	XM_024316559.1 Rosa chinensis uncharacterized protein At2g29880-like	0	0	0.664641	co_expression
TCONS_00000596	0	1.32668	7.48155	112178969	XM_024317253.1 Rosa chinensis TITAN-like protein transcript variant X1,	4.71341	4.73478	10.6476	co_expression
TCONS_00000596	0	1.32668	7.48155	112179762	XM_024318241.1 Rosa chinensis transcription factor BEE 3-like	0.270767	2.35532	11.4686	co_expression
TCONS_00000596	0	1.32668	7.48155	112182861	XM_024321420.1 Rosa chinensis cinnamoyl-CoA reductase 1-like transcript variant X1,	0.858118	0.0290977	0.0270637	co_location
TCONS_00000596	0	1.32668	7.48155	112183347	XM_024321701.1 Rosa chinensis xyloglucan endotransglucosylase/hydrolase protein 9	12.209	12.5326	48.0691	co_expression
TCONS_00000596	0	1.32668	7.48155	112183516	XM_024321900.1 Rosa chinensis F-box protein CPR1-like	0.0777733	0.147624	2.48434	co_expression
TCONS_00000596	0	1.32668	7.48155	112184198	XM_024322469.1 Rosa chinensis uncharacterized LOC112184198	0	0	0.00959533	co_expression
TCONS_00000596	0	1.32668	7.48155	112184297	XM_024322564.1 Rosa chinensis pyridoxal reductase, chloroplastic	0.752832	3.27011	24.889	co_expression
TCONS_00000596	0	1.32668	7.48155	112184598	XM_024322855.1 Rosa chinensis ankyrin repeat-containing protein BDA1-like	0	0	0.131213	co_expression
TCONS_00000596	0	1.32668	7.48155	112184606	XM_024322862.1 Rosa chinensis uncharacterized LOC112184606	0	0	0.0542177	co_expression
TCONS_00000596	0	1.32668	7.48155	112185271	XM_024323517.1 Rosa chinensis RNA exonuclease 4	0	0	0.157131	co_expression
TCONS_00000596	0	1.32668	7.48155	112186472	XM_024324920.1 Rosa chinensis protein MULTIPOLAR SPINDLE 1 transcript variant X1,	0.384763	0.357797	1.53376	co_expression
TCONS_00000596	0	1.32668	7.48155	112187789	XM_024326723.1 Rosa chinensis G-type lectin S-receptor-like serine/threonine-protein kinase RKS1 transcript variant X1,	0.01947	0.0866637	0.662597	co_expression
TCONS_00000596	0	1.32668	7.48155	112187979	XM_024326963.1 Rosa chinensis transcription factor ICE1-like	0	0	0.123462	co_expression
TCONS_00000596	0	1.32668	7.48155	112188055	XM_024327073.1 Rosa chinensis cysteine-rich receptor-like protein kinase 7 transcript variant X1,	0.08403	2.45127	10.1245	co_expression
TCONS_00000596	0	1.32668	7.48155	112188438	XM_024327554.1 Rosa chinensis fibrous sheath CABYR-binding protein-like	6.4069	7.03168	29.7619	co_expression
TCONS_00000596	0	1.32668	7.48155	112188961	XM_024328198.1 Rosa chinensis senescence/dehydration-associated protein At4g35985, chloroplastic-like transcript variant X1,	5.28843	35.6811	99.8432	co_expression
TCONS_00000596	0	1.32668	7.48155	112189629	XM_024328967.1 Rosa chinensis 3-ketoacyl-CoA synthase 4-like transcript variant X1,	0.0870973	1.33732	13.922	co_expression
TCONS_00000596	0	1.32668	7.48155	112189851	XM_024329225.1 Rosa chinensis ATP-citrate synthase alpha chain protein 2-like transcript variant X1,	1.9485	1.89495	3.11455	co_expression
TCONS_00000596	0	1.32668	7.48155	112190381	XM_024329818.1 Rosa chinensis NEP1-interacting protein 1-like	14.5584	35.1982	117.977	co_expression
TCONS_00000596	0	1.32668	7.48155	112190504	XM_024329939.1 Rosa chinensis mitochondrial import inner membrane translocase subunit TIM17-2-like	0	0.045093	0.30675	co_expression
TCONS_00000596	0	1.32668	7.48155	112190924	XM_024330439.1 Rosa chinensis probable serine incorporator transcript variant X1,	0.575027	1.09834	14.7256	co_expression
TCONS_00000596	0	1.32668	7.48155	112191986	XM_024331495.1 Rosa chinensis pentatricopeptide repeat-containing protein At3g46790, chloroplastic transcript variant X1,	1.39013	0.898677	1.67891	co_location
TCONS_00000596	0	1.32668	7.48155	112192009	XM_024331519.1 Rosa chinensis senescence-induced receptor-like serine/threonine-protein kinase transcript variant X1,	0.202989	0.21368	0.290394	co_location
TCONS_00000596	0	1.32668	7.48155	112192016	XM_024331525.1 Rosa chinensis tetraketide alpha-pyrone reductase 1-like transcript variant X1,	15.894	24.5787	30.7326	co_location
TCONS_00000596	0	1.32668	7.48155	112192031	XM_024331547.1 Rosa chinensis cinnamoyl-CoA reductase 1-like	1.29791	0.439548	3.17102	co_location
TCONS_00000596	0	1.32668	7.48155	112192039	XM_024331558.1 Rosa chinensis tetraketide alpha-pyrone reductase 1-like transcript variant X1,	0.162961	0.165334	0.802156	co_location
TCONS_00000596	0	1.32668	7.48155	112192051	XM_024331572.1 Rosa chinensis tetraketide alpha-pyrone reductase 1-like	0	0.0101833	0.259852	co_location
TCONS_00000596	0	1.32668	7.48155	112192068	XM_024331592.1 Rosa chinensis tetraketide alpha-pyrone reductase 1-like	0	0	0.011549	co_location
TCONS_00000596	0	1.32668	7.48155	112192116	XM_024331688.1 Rosa chinensis 40S ribosomal protein S15a-1-like	13.9948	12.8904	12.359	co_location
TCONS_00000596	0	1.32668	7.48155	112192359	XM_024332042.1 Rosa chinensis uncharacterized LOC112192359	0.125188	0.36783	0.964086	co_expression
TCONS_00000596	0	1.32668	7.48155	112192763	XM_024332631.1 Rosa chinensis purple acid phosphatase 22-like	0.20151	0.076224	10.6898	co_expression
TCONS_00000596	0	1.32668	7.48155	112193078	XM_024333102.1 Rosa chinensis GDSL esterase/lipase At1g54790-like transcript variant X1,	3.40321	1.10775	61.8424	co_expression
TCONS_00000596	0	1.32668	7.48155	112193197	XM_024333268.1 Rosa chinensis remorin 4.1-like transcript variant X1,	1.36576	3.2165	14.6787	co_expression
TCONS_00000596	0	1.32668	7.48155	112193264	XM_024333339.1 Rosa chinensis amino acid transporter ANT1-like	1.98537	1.94397	5.09083	co_expression
TCONS_00000596	0	1.32668	7.48155	112193311	XM_024333396.1 Rosa chinensis meiosis-specific protein ASY3	0.132266	0.197271	0.733573	co_expression
TCONS_00000596	0	1.32668	7.48155	112194019	XM_024334284.1 Rosa chinensis uncharacterized LOC112194019	0.480063	0.680279	1.43189	co_expression
TCONS_00000596	0	1.32668	7.48155	112194021	XM_024334286.1 Rosa chinensis protein NIM1-INTERACTING 3	0.116528	0.985595	9.63451	co_expression
TCONS_00000596	0	1.32668	7.48155	112194505	--	0.213255	5.81923	28.5562	co_expression
TCONS_00000596	0	1.32668	7.48155	112194530	XM_024334758.1 Rosa chinensis uncharacterized LOC112194530	0	0.0127053	0.319709	co_expression
TCONS_00000596	0	1.32668	7.48155	112195440	XM_024335879.1 Rosa chinensis receptor-like cytosolic serine/threonine-protein kinase RBK2 transcript variant X1,	0.112743	0.18321	2.20814	co_expression
TCONS_00000596	0	1.32668	7.48155	112195999	XM_024336253.1 Rosa chinensis F-box protein SKIP22-like	0	0.241925	1.05893	co_expression
TCONS_00000596	0	1.32668	7.48155	112196223	XM_024336534.1 Rosa chinensis uncharacterized LOC112196223	0.071885	0.203934	9.56185	co_expression
TCONS_00000596	0	1.32668	7.48155	112196722	XM_024337130.1 Rosa chinensis uncharacterized LOC112196722	0	0.666704	6.49228	co_expression
TCONS_00000596	0	1.32668	7.48155	112196761	XM_024337183.1 Rosa chinensis protein IQ-DOMAIN 14	68.7837	90.0203	135.509	co_expression
TCONS_00000596	0	1.32668	7.48155	112196824	XM_024337288.1 Rosa chinensis purple acid phosphatase 4-like	10.0411	46.2949	208.795	co_expression
TCONS_00000596	0	1.32668	7.48155	112196850	XM_024337320.1 Rosa chinensis uncharacterized LOC112196850	0	0.120098	0.944755	co_expression
TCONS_00000596	0	1.32668	7.48155	112197483	XM_024338183.1 Rosa chinensis protein FLX-like 3 transcript variant X1,	5.31001	6.48445	10.0749	co_expression
TCONS_00000596	0	1.32668	7.48155	112197585	XM_024338321.1 Rosa chinensis mediator-associated protein 2	6.98661	8.09499	10.0174	co_expression
TCONS_00000596	0	1.32668	7.48155	112197736	XM_024338545.1 Rosa chinensis anthocyanidin 3-O-glucosyltransferase 7-like	0.0773243	0.166392	0.73409	co_expression
TCONS_00000596	0	1.32668	7.48155	112197778	XM_024338606.1 Rosa chinensis cyclic dof factor 3-like	0.217341	0.683067	3.06003	co_expression
TCONS_00000596	0	1.32668	7.48155	112198224	XM_024339308.1 Rosa chinensis RING-H2 finger protein ATL16	0.172992	0.580051	2.25703	co_expression
TCONS_00000596	0	1.32668	7.48155	112198361	XM_024339470.1 Rosa chinensis large ribosomal RNA subunit accumulation protein YCED homolog 2, chloroplastic	0.183413	2.1084	8.00129	co_expression
TCONS_00000596	0	1.32668	7.48155	112198789	XM_024339894.1 Rosa chinensis uncharacterized LOC112198789	0	0.330814	1.93853	co_expression
TCONS_00000596	0	1.32668	7.48155	112198849	--	0.504985	13.2128	5.96843	co_location
TCONS_00000596	0	1.32668	7.48155	112198857	XM_024339959.1 Rosa chinensis putative F-box protein At1g47790	0	0.0153887	0.0226277	co_location
TCONS_00000596	0	1.32668	7.48155	112198875	XM_024339974.1 Rosa chinensis uncharacterized LOC112198875	1.67757	2.21382	1.72646	co_location
TCONS_00000596	0	1.32668	7.48155	112199877	XM_024340853.1 Rosa chinensis endonuclease 2	0.24111	0.0825033	6.20712	co_expression
TCONS_00000596	0	1.32668	7.48155	112200040	XM_024341072.1 Rosa chinensis probable LRR receptor-like serine/threonine-protein kinase At3g47570	0	0.0919143	0.476426	co_expression
TCONS_00000596	0	1.32668	7.48155	112200227	XM_024341249.1 Rosa chinensis heavy metal-associated isoprenylated plant protein 20-like	0	4.63465	48.9973	co_expression
TCONS_00000596	0	1.32668	7.48155	112200732	XM_024341738.1 Rosa chinensis palmitoyl-monogalactosyldiacylglycerol delta-7 desaturase, chloroplastic-like	0	5.82189	37.1982	co_expression
TCONS_00000596	0	1.32668	7.48155	112201076	XM_024342091.1 Rosa chinensis probable receptor-like protein kinase At5g24010	0.144621	0.468808	1.42002	co_expression
TCONS_00000596	0	1.32668	7.48155	112201096	XM_024342113.1 Rosa chinensis F-box/kelch-repeat protein At3g06240-like transcript variant X1,	0.118201	0.448059	0.912824	co_expression
TCONS_00000596	0	1.32668	7.48155	112201526	XM_024342419.1 Rosa chinensis aspartic proteinase NANA, chloroplast-like	1.19853	1.26478	176.219	co_expression
TCONS_00000596	0	1.32668	7.48155	112201564	XM_024342472.1 Rosa chinensis pumilio homolog 12-like	0	0	0.151189	co_expression
TCONS_00000596	0	1.32668	7.48155	112201944	--	0.00948967	0.0183493	1.75706	co_expression
TCONS_00000596	0	1.32668	7.48155	112202042	XM_024342948.1 Rosa chinensis protein DMP6-like	2.45268	3.02693	62.7656	co_expression
TCONS_00000596	0	1.32668	7.48155	112202362	XM_024343349.1 Rosa chinensis early nodulin-like protein 2	82.2752	299.47	826.984	co_expression
TCONS_00000596	0	1.32668	7.48155	112202737	XM_024343744.1 Rosa chinensis receptor-like protein EIX2 transcript variant X1,	0.438116	0.772024	1.91046	co_expression
TCONS_00000596	0	1.32668	7.48155	112202987	XM_024344020.1 Rosa chinensis uncharacterized LOC112202987	0.251818	1.40318	10.3368	co_expression
TCONS_00000596	0	1.32668	7.48155	112203000	XM_024344030.1 Rosa chinensis uncharacterized LOC112203000	0	0.032291	0.451394	co_expression
TCONS_00000596	0	1.32668	7.48155	112203030	XM_024344060.1 Rosa chinensis olee1-like protein	0	0	0.347689	co_expression
TCONS_00000596	0	1.32668	7.48155	XLOC_026914	--	0.017396	0.444332	1.51873	co_expression
TCONS_00000597	0	0.0702113	1.10809	112163833	XM_024300086.1 Rosa chinensis zinc finger MYM-type protein 1-like	0.289462	0.28479	0.575002	co_expression
TCONS_00000597	0	0.0702113	1.10809	112164133	--	0.0413137	0.140806	0.933162	co_expression
TCONS_00000597	0	0.0702113	1.10809	112164143	XM_024300382.1 Rosa chinensis glycine-rich cell wall structural protein 2-like	0.117585	0.599467	3.75887	co_expression
TCONS_00000597	0	0.0702113	1.10809	112164273	XM_024300492.1 Rosa chinensis uncharacterized LOC112164273	0	0	0.129237	co_expression
TCONS_00000597	0	0.0702113	1.10809	112164743	XM_024301035.1 Rosa chinensis cytochrome P450 CYP72A219-like	0.177431	1.2996	46.9945	co_expression
TCONS_00000597	0	0.0702113	1.10809	112164827	XM_024301154.1 Rosa chinensis cysteine-rich receptor-like protein kinase 25 transcript variant X1,	0.0276287	0.164399	1.00595	co_expression
TCONS_00000597	0	0.0702113	1.10809	112165173	XM_024301606.1 Rosa chinensis zingipain-2-like	0.415105	4.08083	54.149	co_expression
TCONS_00000597	0	0.0702113	1.10809	112165277	XM_024301760.1 Rosa chinensis fatty acid desaturase 4, chloroplastic	0.051787	0.540439	15.6892	co_expression
TCONS_00000597	0	0.0702113	1.10809	112165378	XM_024301871.1 Rosa chinensis uncharacterized LOC112165378	7.51798	7.04849	20.8385	co_expression
TCONS_00000597	0	0.0702113	1.10809	112165441	XM_024301945.1 Rosa chinensis G-type lectin S-receptor-like serine/threonine-protein kinase LECRK2 transcript variant X1,	0.288753	0.414498	2.20106	co_expression
TCONS_00000597	0	0.0702113	1.10809	112165442	XM_024301946.1 Rosa chinensis G-type lectin S-receptor-like serine/threonine-protein kinase LECRK3 transcript variant X1,	0.126263	0.090918	0.667763	co_expression
TCONS_00000597	0	0.0702113	1.10809	112165443	XM_024301948.1 Rosa chinensis G-type lectin S-receptor-like serine/threonine-protein kinase LECRK3	0.158911	0.268974	1.61488	co_expression
TCONS_00000597	0	0.0702113	1.10809	112165451	XM_024301955.1 Rosa chinensis G-type lectin S-receptor-like serine/threonine-protein kinase LECRK3	0.124182	0.317673	1.45591	co_expression
TCONS_00000597	0	0.0702113	1.10809	112165516	XM_024302096.1 Rosa chinensis notchless protein homolog	6.36201	3.46107	7.88515	co_location
TCONS_00000597	0	0.0702113	1.10809	112165555	XM_024302107.1 Rosa chinensis transcription factor MYB102	0	0.030472	2.28373	co_expression
TCONS_00000597	0	0.0702113	1.10809	112165804	XM_024302470.1 Rosa chinensis ABC transporter C family member 3-like	0.0325523	0.0238133	0.876024	co_expression
TCONS_00000597	0	0.0702113	1.10809	112165823	XM_024302491.1 Rosa chinensis lysine--tRNA ligase-like transcript variant X1,	0.119241	0.161259	1.08856	co_expression
TCONS_00000597	0	0.0702113	1.10809	112166257	XM_024303051.1 Rosa chinensis cytochrome P450 72A15-like	0.009884	0.566966	5.01206	co_expression
TCONS_00000597	0	0.0702113	1.10809	112166272	XM_024303069.1 Rosa chinensis NAC domain-containing protein 73-like	2.85864	2.11513	26.1528	co_expression
TCONS_00000597	0	0.0702113	1.10809	112166364	XM_024303201.1 Rosa chinensis zinc finger protein ZAT12-like	0.410177	1.37804	4.43489	co_expression
TCONS_00000597	0	0.0702113	1.10809	112166881	XM_024303805.1 Rosa chinensis cytochrome P450 CYP72A219-like transcript variant X1,	0.019556	0.0192557	0.320028	co_expression
TCONS_00000597	0	0.0702113	1.10809	112167159	XM_024304130.1 Rosa chinensis glucan endo-1,3-beta-glucosidase 13	0.380262	0.136041	4.31915	co_expression
TCONS_00000597	0	0.0702113	1.10809	112167227	XM_024304214.1 Rosa chinensis cyclic nucleotide-gated ion channel 4	0.00795133	0	0.200768	co_expression
TCONS_00000597	0	0.0702113	1.10809	112167398	XM_024304412.1 Rosa chinensis F-box protein At4g22390-like transcript variant X1,	0.0345697	0	0.399427	co_expression
TCONS_00000597	0	0.0702113	1.10809	112167412	--	0.0473227	0.142179	1.44704	co_expression
TCONS_00000597	0	0.0702113	1.10809	112167450	XM_024304477.1 Rosa chinensis mechanosensitive ion channel protein 6-like transcript variant X1,	0	0	0.15454	co_expression
TCONS_00000597	0	0.0702113	1.10809	112168291	XM_024305410.1 Rosa chinensis kunitz trypsin inhibitor 2-like	0.062975	0.148586	9.97898	co_expression
TCONS_00000597	0	0.0702113	1.10809	112168417	XM_024305540.1 Rosa chinensis G-type lectin S-receptor-like serine/threonine-protein kinase At1g67520 transcript variant X1,	0.696228	1.31771	3.87289	co_expression
TCONS_00000597	0	0.0702113	1.10809	112169193	XM_024306178.1 Rosa chinensis protein SRG1-like	0	0.117938	0.699473	co_expression
TCONS_00000597	0	0.0702113	1.10809	112169324	XM_024306338.1 Rosa chinensis laccase-15-like	0.115215	0.0109447	0.648431	co_expression
TCONS_00000597	0	0.0702113	1.10809	112169376	XM_024306403.1 Rosa chinensis cytochrome P450 703A2	0	0	0.271691	co_expression
TCONS_00000597	0	0.0702113	1.10809	112170002	XM_024307145.1 Rosa chinensis ABC transporter I family member 19-like transcript variant X1,	11.4188	10.2077	47.2476	co_expression
TCONS_00000597	0	0.0702113	1.10809	112170231	XM_024307441.1 Rosa chinensis uncharacterized LOC112170231	0	0	0.0689977	co_expression
TCONS_00000597	0	0.0702113	1.10809	112170458	XM_024307752.1 Rosa chinensis pleiotropic drug resistance protein 1-like	0.0102967	0.426846	2.15736	co_expression
TCONS_00000597	0	0.0702113	1.10809	112170462	XM_024307759.1 Rosa chinensis embryogenesis-associated protein EMB8-like	0.011095	0	0.468358	co_expression
TCONS_00000597	0	0.0702113	1.10809	112170507	XM_024307826.1 Rosa chinensis PXMP2/4 family protein 4-like	2.15094	3.01938	18.418	co_expression
TCONS_00000597	0	0.0702113	1.10809	112171515	XM_024308687.1 Rosa chinensis polygalacturonase-like	0	0	3.21246	co_expression
TCONS_00000597	0	0.0702113	1.10809	112172113	XM_024309301.1 Rosa chinensis cytochrome P450 CYP82D47-like transcript variant X1,	0	0.088246	0.637178	co_expression
TCONS_00000597	0	0.0702113	1.10809	112172125	XM_024309318.1 Rosa chinensis uncharacterized LOC112172125	0.00593733	0.0103413	2.2308	co_expression
TCONS_00000597	0	0.0702113	1.10809	112172235	XM_024309500.1 Rosa chinensis probable flavin-containing monooxygenase 1	0.875568	1.288	3.46709	co_expression
TCONS_00000597	0	0.0702113	1.10809	112172348	XM_024309648.1 Rosa chinensis DNA-directed RNA polymerase II subunit 4-like	0	0.0689937	6.1596	co_expression
TCONS_00000597	0	0.0702113	1.10809	112173032	XM_024310577.1 Rosa chinensis probable flavin-containing monooxygenase 1	0.0254843	0.0351383	0.367652	co_expression
TCONS_00000597	0	0.0702113	1.10809	112173086	XM_024310632.1 Rosa chinensis DNA replication licensing factor MCM4	0.116469	0.0431587	0.457686	co_expression
TCONS_00000597	0	0.0702113	1.10809	112173422	XM_024311041.1 Rosa chinensis indole-3-acetic acid-induced protein ARG7	0.0599953	0.041907	0.346173	co_expression
TCONS_00000597	0	0.0702113	1.10809	112173494	XM_024311131.1 Rosa chinensis protein NRT1/ PTR FAMILY 4.4-like	0	0.006178	0.468385	co_expression
TCONS_00000597	0	0.0702113	1.10809	112173548	XM_024311185.1 Rosa chinensis amino acid permease 8-like	0	0.0375633	0.724528	co_expression
TCONS_00000597	0	0.0702113	1.10809	112174251	XM_024311986.1 Rosa chinensis pathogenesis-related protein 5	0	0	0.241018	co_expression
TCONS_00000597	0	0.0702113	1.10809	112174338	XM_024312078.1 Rosa chinensis non-specific lipid-transfer protein-like protein At2g13820	0	0	2.07273	co_expression
TCONS_00000597	0	0.0702113	1.10809	112174495	XM_024312269.1 Rosa chinensis neutral ceramidase 2-like	0	0	0.0234223	co_expression
TCONS_00000597	0	0.0702113	1.10809	112174505	XM_024312288.1 Rosa chinensis PTI1-like tyrosine-protein kinase At3g15890	0.0274553	0.290788	0.870409	co_expression
TCONS_00000597	0	0.0702113	1.10809	112174575	XM_024312370.1 Rosa chinensis toll/interleukin-1 receptor-like protein transcript variant X1,	2.14804	4.5017	14.6265	co_expression
TCONS_00000597	0	0.0702113	1.10809	112174586	XM_024312386.1 Rosa chinensis protein ALP1-like	0.025495	0.0312753	3.15863	co_expression
TCONS_00000597	0	0.0702113	1.10809	112175081	XM_024312749.1 Rosa chinensis pentatricopeptide repeat-containing protein At3g53170 transcript variant X1,	5.71008	2.09616	1.41702	co_location
TCONS_00000597	0	0.0702113	1.10809	112175287	XM_024312961.1 Rosa chinensis quinolinate synthase, chloroplastic	6.64371	7.1791	32.879	co_expression
TCONS_00000597	0	0.0702113	1.10809	112175450	XM_024313130.1 Rosa chinensis F-box protein At3g12350-like	0	0.172699	1.17302	co_expression
TCONS_00000597	0	0.0702113	1.10809	112175474	XM_024313155.1 Rosa chinensis polyketide synthase 1-like	13.9173	3.48991	74.0926	co_expression
TCONS_00000597	0	0.0702113	1.10809	112175738	XM_024313467.1 Rosa chinensis uncharacterized LOC112175738	0.256933	0.621742	5.04152	co_expression
TCONS_00000597	0	0.0702113	1.10809	112176403	XM_024314307.1 Rosa chinensis probable receptor-like protein kinase At5g61350	5.41281	5.73779	12.4586	co_expression
TCONS_00000597	0	0.0702113	1.10809	112176426	XM_024314350.1 Rosa chinensis uncharacterized LOC112176426	0.0247193	1.01663	7.07696	co_expression
TCONS_00000597	0	0.0702113	1.10809	112176513	XM_024314470.1 Rosa chinensis protein NRT1/ PTR FAMILY 7.3	2.61594	7.65991	26.5068	co_expression
TCONS_00000597	0	0.0702113	1.10809	112176707	XM_024314763.1 Rosa chinensis metal-nicotianamine transporter YSL1 transcript variant X1,	0.1149	0.798427	12.1072	co_expression
TCONS_00000597	0	0.0702113	1.10809	112176835	XM_024314923.1 Rosa chinensis BTB/POZ and TAZ domain-containing protein 1	22.8638	63.8246	173.599	co_expression
TCONS_00000597	0	0.0702113	1.10809	112176921	XM_024315059.1 Rosa chinensis cysteine-rich receptor-like protein kinase 10 transcript variant X1,	0.0134393	0.0449723	0.794527	co_expression
TCONS_00000597	0	0.0702113	1.10809	112177081	XM_024315275.1 Rosa chinensis probable aquaporin NIP5-1	0.209862	0.340512	2.27058	co_expression
TCONS_00000597	0	0.0702113	1.10809	112177237	XM_024315526.1 Rosa chinensis probable glutathione S-transferase	0	0	2.12945	co_expression
TCONS_00000597	0	0.0702113	1.10809	112177333	XM_024315629.1 Rosa chinensis ethylene-responsive transcription factor ERF113-like partial	0	0	0.230399	co_expression
TCONS_00000597	0	0.0702113	1.10809	112177536	XM_024315823.1 Rosa chinensis alpha-N-acetylglucosaminidase transcript variant X1,	18.8766	13.8065	18.4821	co_location
TCONS_00000597	0	0.0702113	1.10809	112177594	XM_024315876.1 Rosa chinensis cytochrome P450 714A1-like	0	0	0.210447	co_expression
TCONS_00000597	0	0.0702113	1.10809	112177639	XM_024315914.1 Rosa chinensis polyamine oxidase 1 transcript variant X1,	0.141783	0	0.0203137	co_location
TCONS_00000597	0	0.0702113	1.10809	112177663	XM_024315931.1 Rosa chinensis probable glycosyltransferase STELLO2	2.47853	0	0.030544	co_location
TCONS_00000597	0	0.0702113	1.10809	112178289	XM_024316450.1 Rosa chinensis acyl-CoA 5-desaturase AL21-like partial	0	0	0.366536	co_expression
TCONS_00000597	0	0.0702113	1.10809	112178427	--	2.21328	5.25151	30.4491	co_expression
TCONS_00000597	0	0.0702113	1.10809	112178452	XM_024316595.1 Rosa chinensis TMV resistance protein N-like	0.00585133	0.100903	0.361303	co_expression
TCONS_00000597	0	0.0702113	1.10809	112178612	XM_024316784.1 Rosa chinensis beta-amylase 3, chloroplastic	0.209342	0.105921	1.82194	co_expression
TCONS_00000597	0	0.0702113	1.10809	112178736	XM_024316940.1 Rosa chinensis aluminum-activated malate transporter 12-like	0.0100267	0.0105243	0.174137	co_expression
TCONS_00000597	0	0.0702113	1.10809	112178891	XM_024317154.1 Rosa chinensis probable WRKY transcription factor 29	0.236326	0.988043	12.3298	co_expression
TCONS_00000597	0	0.0702113	1.10809	112179088	XM_024317410.1 Rosa chinensis glutathione S-transferase U10-like	0	0	0.0444163	co_expression
TCONS_00000597	0	0.0702113	1.10809	112179107	XM_024317431.1 Rosa chinensis inositol oxygenase 1-like	0.0778393	0.65681	6.82948	co_expression
TCONS_00000597	0	0.0702113	1.10809	112179271	XM_024317639.1 Rosa chinensis phospholipase A1-Ibeta2, chloroplastic	0.468516	0.611105	3.4787	co_expression
TCONS_00000597	0	0.0702113	1.10809	112179355	XM_024317754.1 Rosa chinensis LEAF RUST 10 DISEASE-RESISTANCE LOCUS RECEPTOR-LIKE PROTEIN KINASE-like 1.2	0.00789533	0.135729	0.631648	co_expression
TCONS_00000597	0	0.0702113	1.10809	112179481	XM_024317902.1 Rosa chinensis non-specific lipid-transfer protein-like transcript variant X1,	0	0.01463	0.647477	co_expression
TCONS_00000597	0	0.0702113	1.10809	112180272	XM_024318802.1 Rosa chinensis protein DMP3	0.068481	0.661319	4.58266	co_expression
TCONS_00000597	0	0.0702113	1.10809	112180547	XM_024319104.1 Rosa chinensis putative pumilio homolog 7, chloroplastic	0.346351	0.889265	2.50609	co_expression
TCONS_00000597	0	0.0702113	1.10809	112180548	XM_024319105.1 Rosa chinensis 1-aminocyclopropane-1-carboxylate synthase	0.0379453	0.530255	6.28426	co_expression
TCONS_00000597	0	0.0702113	1.10809	112180913	XM_024319493.1 Rosa chinensis heavy metal-associated isoprenylated plant protein 39-like	0.527376	5.14083	82.7079	co_expression
TCONS_00000597	0	0.0702113	1.10809	112181277	--	0.00455167	0	0.21286	co_expression
TCONS_00000597	0	0.0702113	1.10809	112181757	XM_024320157.1 Rosa chinensis lon protease homolog 1, mitochondrial-like	0.0239747	0.0493013	0.201244	co_expression
TCONS_00000597	0	0.0702113	1.10809	112182064	XM_024320495.1 Rosa chinensis myb-related protein 308-like	0.0693607	0	0.652532	co_expression
TCONS_00000597	0	0.0702113	1.10809	112182186	XM_024320635.1 Rosa chinensis synaptotagmin-3 transcript variant X1,	0	0	0.166398	co_expression
TCONS_00000597	0	0.0702113	1.10809	112182249	XM_024320688.1 Rosa chinensis ras-related protein RABC2a-like	0.058787	0.355138	1.61132	co_expression
TCONS_00000597	0	0.0702113	1.10809	112182260	XM_024320706.1 Rosa chinensis protein NUCLEAR FUSION DEFECTIVE 4-like	0.0819483	0.127564	3.80077	co_expression
TCONS_00000597	0	0.0702113	1.10809	112182413	XM_024320912.1 Rosa chinensis glyoxylate/hydroxypyruvate reductase HPR3	0	0	0.0993197	co_expression
TCONS_00000597	0	0.0702113	1.10809	112182428	--	0.478833	0.257899	4.49164	co_expression
TCONS_00000597	0	0.0702113	1.10809	112182465	XM_024320960.1 Rosa chinensis eukaryotic translation initiation factor 2 subunit beta-like	1.17849	0.695152	4.59586	co_expression
TCONS_00000597	0	0.0702113	1.10809	112182507	XM_024321001.1 Rosa chinensis glutathione transferase GST 23-like	0.207048	0.578502	3.25853	co_expression
TCONS_00000597	0	0.0702113	1.10809	112182861	XM_024321420.1 Rosa chinensis cinnamoyl-CoA reductase 1-like transcript variant X1,	0.858118	0.0290977	0.0270637	co_location
TCONS_00000597	0	0.0702113	1.10809	112183887	XM_024322206.1 Rosa chinensis uncharacterized LOC112183887	0.8983	4.65122	43.4345	co_expression
TCONS_00000597	0	0.0702113	1.10809	112184108	XM_024322390.1 Rosa chinensis probable glucan 1,3-beta-glucosidase A transcript variant X1,	0.295431	0.331253	3.01932	co_expression
TCONS_00000597	0	0.0702113	1.10809	112184533	XM_024322797.1 Rosa chinensis (6-4)DNA photolyase	0.718824	1.06695	8.37714	co_expression
TCONS_00000597	0	0.0702113	1.10809	112185006	XM_024323223.1 Rosa chinensis uncharacterized LOC112185006	1.30934	1.28148	8.03216	co_expression
TCONS_00000597	0	0.0702113	1.10809	112185012	XM_024323229.1 Rosa chinensis uncharacterized LOC112185012	0.444446	0.491713	5.69666	co_expression
TCONS_00000597	0	0.0702113	1.10809	112185051	XM_024323260.1 Rosa chinensis calcium permeable stress-gated cation channel 1 transcript variant X1,	5.56771	4.4157	29.8429	co_expression
TCONS_00000597	0	0.0702113	1.10809	112185219	XM_024323421.1 Rosa chinensis uncharacterized LOC112185219	0.239451	0.473341	1.20866	co_expression
TCONS_00000597	0	0.0702113	1.10809	112185370	XM_024323613.1 Rosa chinensis anthocyanidin 3-O-glucosyltransferase 2	0.0491567	0.498335	30.5359	co_expression
TCONS_00000597	0	0.0702113	1.10809	112185634	XM_024323896.1 Rosa chinensis transcription factor MYB114-like transcript variant X1,	0.086184	0.850011	53.8902	co_expression
TCONS_00000597	0	0.0702113	1.10809	112185817	XM_024324127.1 Rosa chinensis protein TONSOKU	0.147422	0.121	0.45685	co_expression
TCONS_00000597	0	0.0702113	1.10809	112186380	XM_024324775.1 Rosa chinensis probable caffeoyl-CoA O-methyltransferase At4g26220 transcript variant X1,	1.30772	0.784718	16.466	co_expression
TCONS_00000597	0	0.0702113	1.10809	112186523	XM_024324974.1 Rosa chinensis GEM-like protein 5	3.27236	3.97886	22.9968	co_expression
TCONS_00000597	0	0.0702113	1.10809	112186541	XM_024324990.1 Rosa chinensis probable polyol transporter 6	0.031025	0.201056	8.45233	co_expression
TCONS_00000597	0	0.0702113	1.10809	112187009	XM_024325614.1 Rosa chinensis aldehyde dehydrogenase family 3 member H1-like transcript variant X1,	0.349933	0.810239	6.17116	co_expression
TCONS_00000597	0	0.0702113	1.10809	112187280	XM_024326020.1 Rosa chinensis umecyanin-like	2.93068	1.57675	13.7105	co_expression
TCONS_00000597	0	0.0702113	1.10809	112187519	XM_024326359.1 Rosa chinensis ethylene-responsive transcription factor ERF110-like transcript variant X1,	4.97812	8.53432	58.9711	co_expression
TCONS_00000597	0	0.0702113	1.10809	112187558	XM_024326405.1 Rosa chinensis 3-ketodihydrosphingosine reductase	2.20361	3.37747	11.438	co_expression
TCONS_00000597	0	0.0702113	1.10809	112187601	XM_024326468.1 Rosa chinensis ethylene-responsive transcription factor ABR1-like	3.36573	8.12605	49.9153	co_expression
TCONS_00000597	0	0.0702113	1.10809	112187813	XM_024326759.1 Rosa chinensis dirigent protein 23-like	0.0223443	0.0128953	0.276199	co_expression
TCONS_00000597	0	0.0702113	1.10809	112187880	XM_024326842.1 Rosa chinensis probable WRKY transcription factor 71	0	0	0.313177	co_expression
TCONS_00000597	0	0.0702113	1.10809	112188242	XM_024327323.1 Rosa chinensis beta-amyrin synthase-like	0.011655	0.128356	2.09684	co_expression
TCONS_00000597	0	0.0702113	1.10809	112189040	XM_024328304.1 Rosa chinensis laccase-15-like	0.0163593	0	1.74329	co_expression
TCONS_00000597	0	0.0702113	1.10809	112189162	XM_024328430.1 Rosa chinensis transcription factor MYB41-like	0	0	0.250696	co_expression
TCONS_00000597	0	0.0702113	1.10809	112189742	XM_024329090.1 Rosa chinensis putative receptor-like protein kinase At3g47110 transcript variant X1,	0.0385727	0.0934813	0.53063	co_expression
TCONS_00000597	0	0.0702113	1.10809	112189867	XM_024329242.1 Rosa chinensis sucrose transport protein SUC3-like	0.279414	0.170138	0.865533	co_expression
TCONS_00000597	0	0.0702113	1.10809	112190401	XM_024329831.1 Rosa chinensis cytokinin hydroxylase-like	0	0.0101633	0.112826	co_expression
TCONS_00000597	0	0.0702113	1.10809	112190540	XM_024329973.1 Rosa chinensis sulfite exporter TauE/SafE family protein 3-like	0.115289	0.057237	0.624596	co_expression
TCONS_00000597	0	0.0702113	1.10809	112191986	XM_024331495.1 Rosa chinensis pentatricopeptide repeat-containing protein At3g46790, chloroplastic transcript variant X1,	1.39013	0.898677	1.67891	co_location
TCONS_00000597	0	0.0702113	1.10809	112192009	XM_024331519.1 Rosa chinensis senescence-induced receptor-like serine/threonine-protein kinase transcript variant X1,	0.202989	0.21368	0.290394	co_location
TCONS_00000597	0	0.0702113	1.10809	112192016	XM_024331525.1 Rosa chinensis tetraketide alpha-pyrone reductase 1-like transcript variant X1,	15.894	24.5787	30.7326	co_location
TCONS_00000597	0	0.0702113	1.10809	112192031	XM_024331547.1 Rosa chinensis cinnamoyl-CoA reductase 1-like	1.29791	0.439548	3.17102	co_location
TCONS_00000597	0	0.0702113	1.10809	112192039	XM_024331558.1 Rosa chinensis tetraketide alpha-pyrone reductase 1-like transcript variant X1,	0.162961	0.165334	0.802156	co_location
TCONS_00000597	0	0.0702113	1.10809	112192051	XM_024331572.1 Rosa chinensis tetraketide alpha-pyrone reductase 1-like	0	0.0101833	0.259852	co_location
TCONS_00000597	0	0.0702113	1.10809	112192068	XM_024331592.1 Rosa chinensis tetraketide alpha-pyrone reductase 1-like	0	0	0.011549	co_location
TCONS_00000597	0	0.0702113	1.10809	112192116	XM_024331688.1 Rosa chinensis 40S ribosomal protein S15a-1-like	13.9948	12.8904	12.359	co_location
TCONS_00000597	0	0.0702113	1.10809	112192186	XM_024331778.1 Rosa chinensis selT-like protein transcript variant X1,	7.20189	11.474	32.2184	co_expression
TCONS_00000597	0	0.0702113	1.10809	112192395	XM_024332107.1 Rosa chinensis alpha-humulene 10-hydroxylase-like	0	0	0.523479	co_expression
TCONS_00000597	0	0.0702113	1.10809	112192726	XM_024332587.1 Rosa chinensis uncharacterized LOC112192726 transcript variant X1,	0	0	0.0532303	co_expression
TCONS_00000597	0	0.0702113	1.10809	112192778	XM_024332647.1 Rosa chinensis non-functional NADPH-dependent codeinone reductase 2-like	0.0179057	0.0744997	0.503063	co_expression
TCONS_00000597	0	0.0702113	1.10809	112192821	XM_024332703.1 Rosa chinensis thaumatin-like protein 1b	0.795831	1.60212	413.985	co_expression
TCONS_00000597	0	0.0702113	1.10809	112192982	XM_024332955.1 Rosa chinensis probable sugar phosphate/phosphate translocator At3g11320	0.104274	1.36424	3.84225	co_expression
TCONS_00000597	0	0.0702113	1.10809	112193031	XM_024333040.1 Rosa chinensis glucan endo-1,3-beta-glucosidase-like	0.0354143	0.4039	14.6089	co_expression
TCONS_00000597	0	0.0702113	1.10809	112193355	XM_024333459.1 Rosa chinensis cysteine synthase-like transcript variant X1,	0.0138687	0	0.959964	co_expression
TCONS_00000597	0	0.0702113	1.10809	112193503	XM_024333681.1 Rosa chinensis putative ABC transporter C family member 15 transcript variant X1,	0.245353	0.157618	0.711142	co_expression
TCONS_00000597	0	0.0702113	1.10809	112193578	XM_024333766.1 Rosa chinensis alpha carbonic anhydrase 1, chloroplastic	0.979966	0.733283	8.41154	co_expression
TCONS_00000597	0	0.0702113	1.10809	112193611	XM_024333814.1 Rosa chinensis probable LRR receptor-like serine/threonine-protein kinase At5g63710 transcript variant X1,	0.768482	1.66996	10.213	co_expression
TCONS_00000597	0	0.0702113	1.10809	112193719	XM_024333950.1 Rosa chinensis receptor like protein 6-like	0.0597997	0.0348553	0.167538	co_expression
TCONS_00000597	0	0.0702113	1.10809	112193894	XM_024334153.1 Rosa chinensis transcription factor MYB113-like	0.0189233	0.177614	3.57224	co_expression
TCONS_00000597	0	0.0702113	1.10809	112193963	XM_024334226.1 Rosa chinensis NAC domain-containing protein 2-like	0	0.247334	0.945687	co_expression
TCONS_00000597	0	0.0702113	1.10809	112194080	XM_024334585.1 Rosa chinensis uncharacterized LOC112194080 transcript variant X1,	0.0659757	0.148029	5.03342	co_expression
TCONS_00000597	0	0.0702113	1.10809	112194410	XM_024334651.1 Rosa chinensis protein NRT1/ PTR FAMILY 7.2-like transcript variant X1,	0	0	0.583343	co_expression
TCONS_00000597	0	0.0702113	1.10809	112194421	XM_024334666.1 Rosa chinensis protein NRT1/ PTR FAMILY 7.2-like transcript variant X4,	0.241146	1.75603	10.9964	co_expression
TCONS_00000597	0	0.0702113	1.10809	112194449	XM_024334689.1 Rosa chinensis protein NRT1/ PTR FAMILY 7.2-like	0	0	2.92088	co_expression
TCONS_00000597	0	0.0702113	1.10809	112194885	XM_024335137.1 Rosa chinensis peroxidase 5-like	0.0169433	0.0553693	0.537816	co_expression
TCONS_00000597	0	0.0702113	1.10809	112194924	XM_024335179.1 Rosa chinensis polygalacturonase-like transcript variant X1,	0	0	0.303177	co_expression
TCONS_00000597	0	0.0702113	1.10809	112195200	XM_024335567.1 Rosa chinensis uncharacterized LOC112195200	0	0	0.313657	co_expression
TCONS_00000597	0	0.0702113	1.10809	112195277	XM_024335656.1 Rosa chinensis glutathione S-transferase F11-like	29.3734	10.5078	328.918	co_expression
TCONS_00000597	0	0.0702113	1.10809	112195300	XM_024335707.1 Rosa chinensis WAT1-related protein At5g07050-like	2.92793	10.2657	66.0063	co_expression
TCONS_00000597	0	0.0702113	1.10809	112195839	XM_024336056.1 Rosa chinensis G-type lectin S-receptor-like serine/threonine-protein kinase At1g61370 transcript variant X1,	0.134874	0.0828393	2.10333	co_expression
TCONS_00000597	0	0.0702113	1.10809	112196450	XM_024336797.1 Rosa chinensis uncharacterized LOC112196450	0.0289557	0	0.239709	co_expression
TCONS_00000597	0	0.0702113	1.10809	112197204	XM_024337810.1 Rosa chinensis glycerol-3-phosphate acyltransferase 5-like	0.021619	0	2.03049	co_expression
TCONS_00000597	0	0.0702113	1.10809	112197309	XM_024337928.1 Rosa chinensis uncharacterized LOC112197309	0.026713	0.675601	4.26217	co_expression
TCONS_00000597	0	0.0702113	1.10809	112197646	XM_024338398.1 Rosa chinensis ACD11 homolog protein	0.0774083	0.791814	5.3225	co_expression
TCONS_00000597	0	0.0702113	1.10809	112197789	XM_024338622.1 Rosa chinensis uncharacterized LOC112197789	4.37403	7.80681	24.5965	co_expression
TCONS_00000597	0	0.0702113	1.10809	112197824	XM_024338707.1 Rosa chinensis cinnamoyl-CoA reductase-like SNL6	0.0396577	0.125741	1.66834	co_expression
TCONS_00000597	0	0.0702113	1.10809	112198230	XM_024339314.1 Rosa chinensis extracellular ribonuclease LE-like	0.155076	0.424205	3.68363	co_expression
TCONS_00000597	0	0.0702113	1.10809	112198316	XM_024339419.1 Rosa chinensis cell number regulator 2-like	9.04261	24.4411	78.958	co_expression
TCONS_00000597	0	0.0702113	1.10809	112198728	XM_024339849.1 Rosa chinensis protein ALP1-like	0.0169983	0.00262033	1.55103	co_expression
TCONS_00000597	0	0.0702113	1.10809	112198857	XM_024339959.1 Rosa chinensis putative F-box protein At1g47790	0	0.0153887	0.0226277	co_location
TCONS_00000597	0	0.0702113	1.10809	112198875	XM_024339974.1 Rosa chinensis uncharacterized LOC112198875	1.67757	2.21382	1.72646	co_location
TCONS_00000597	0	0.0702113	1.10809	112200071	XM_024341078.1 Rosa chinensis ras guanine nucleotide exchange factor M-like transcript variant X1,	0	0.0196277	0.210958	co_expression
TCONS_00000597	0	0.0702113	1.10809	112200146	XM_024341162.1 Rosa chinensis homeobox-leucine zipper protein HAT22-like	0.114145	1.10329	15.1948	co_expression
TCONS_00000597	0	0.0702113	1.10809	112200743	XM_024341751.1 Rosa chinensis (R,S)-reticuline 7-O-methyltransferase-like	0.106844	0	1.18537	co_expression
TCONS_00000597	0	0.0702113	1.10809	112200758	XM_024341769.1 Rosa chinensis uncharacterized LOC112200758	0	0	0.0321063	co_expression
TCONS_00000597	0	0.0702113	1.10809	112200989	XM_024341996.1 Rosa chinensis putative glycine-rich cell wall structural protein 1 transcript variant X1,	0.505921	0.505992	4.3684	co_expression
TCONS_00000597	0	0.0702113	1.10809	112201400	XM_024342275.1 Rosa chinensis 3-isopropylmalate dehydratase large subunit, chloroplastic-like	0.00509833	0.0226407	0.180739	co_expression
TCONS_00000597	0	0.0702113	1.10809	112201426	XM_024342300.1 Rosa chinensis putative pectinesterase 11	0	0	0.081084	co_expression
TCONS_00000597	0	0.0702113	1.10809	112201652	XM_024342564.1 Rosa chinensis 60S acidic ribosomal protein P2-like	0	0.107877	1.77979	co_expression
TCONS_00000597	0	0.0702113	1.10809	112202168	XM_024343099.1 Rosa chinensis phenolic glucoside malonyltransferase 1-like	0	0	0.0838493	co_expression
TCONS_00000597	0	0.0702113	1.10809	112202339	XM_024343326.1 Rosa chinensis protein ALP1-like	0.153109	0.148518	0.750163	co_expression
TCONS_00000597	0	0.0702113	1.10809	112202533	XM_024343542.1 Rosa chinensis ABC transporter C family member 3-like	0.058203	0.69796	11.7315	co_expression
TCONS_00000597	0	0.0702113	1.10809	112202858	XM_024343879.1 Rosa chinensis probable aquaporin TIP1-2	1.92526	4.21675	16.7461	co_expression
TCONS_00000597	0	0.0702113	1.10809	112203297	XM_024344288.1 Rosa chinensis receptor-like protein CLAVATA2	0	0.0123407	0.170398	co_expression
TCONS_00000597	0	0.0702113	1.10809	112203403	XM_024344376.1 Rosa chinensis scarecrow-like protein 21	13.0908	16.1006	42.8782	co_expression
TCONS_00000597	0	0.0702113	1.10809	112203675	XM_024344603.1 Rosa chinensis uncharacterized LOC112203675	0	0.0112053	0.610414	co_expression
TCONS_00000597	0	0.0702113	1.10809	112203703	XM_024344629.1 Rosa chinensis protein FAR1-RELATED SEQUENCE 4-like	0	0	0.076976	co_expression
TCONS_00000597	0	0.0702113	1.10809	112204032	XM_024344917.1 Rosa chinensis uncharacterized LOC112204032	0.227658	0.537685	1.47172	co_expression
TCONS_00000597	0	0.0702113	1.10809	XLOC_057446	--	0	0.098009	3.42056	co_expression
TCONS_00000771	0	0.100431	0.903432	112164143	XM_024300382.1 Rosa chinensis glycine-rich cell wall structural protein 2-like	0.117585	0.599467	3.75887	co_expression
TCONS_00000771	0	0.100431	0.903432	112164273	XM_024300492.1 Rosa chinensis uncharacterized LOC112164273	0	0	0.129237	co_expression
TCONS_00000771	0	0.100431	0.903432	112164743	XM_024301035.1 Rosa chinensis cytochrome P450 CYP72A219-like	0.177431	1.2996	46.9945	co_expression
TCONS_00000771	0	0.100431	0.903432	112164794	XM_024301106.1 Rosa chinensis uncharacterized LOC112164794 transcript variant X1,	0.94671	6.7471	31.8679	co_expression
TCONS_00000771	0	0.100431	0.903432	112165006	XM_024301382.1 Rosa chinensis probable LRR receptor-like serine/threonine-protein kinase At3g47570	0.548386	0.549406	3.2014	co_expression
TCONS_00000771	0	0.100431	0.903432	112165174	XM_024301607.1 Rosa chinensis senescence-specific cysteine protease SAG12-like	0.157512	0.658921	68.1203	co_expression
TCONS_00000771	0	0.100431	0.903432	112165229	XM_024301678.1 Rosa chinensis NAC transcription factor 56-like	1.24929	2.83157	9.79	co_expression
TCONS_00000771	0	0.100431	0.903432	112165277	XM_024301760.1 Rosa chinensis fatty acid desaturase 4, chloroplastic	0.051787	0.540439	15.6892	co_expression
TCONS_00000771	0	0.100431	0.903432	112165441	XM_024301945.1 Rosa chinensis G-type lectin S-receptor-like serine/threonine-protein kinase LECRK2 transcript variant X1,	0.288753	0.414498	2.20106	co_expression
TCONS_00000771	0	0.100431	0.903432	112165443	XM_024301948.1 Rosa chinensis G-type lectin S-receptor-like serine/threonine-protein kinase LECRK3	0.158911	0.268974	1.61488	co_expression
TCONS_00000771	0	0.100431	0.903432	112165571	XM_024302127.1 Rosa chinensis (S)-2-hydroxy-acid oxidase GLO1 transcript variant X1,	0.335918	0.523783	3.81607	co_expression
TCONS_00000771	0	0.100431	0.903432	112165793	XM_024302454.1 Rosa chinensis photosystem II 10 kDa polypeptide, chloroplastic	4.53444	34.9829	129.89	co_expression
TCONS_00000771	0	0.100431	0.903432	112165832	XM_024302515.1 Rosa chinensis pathogenesis-related genes transcriptional activator PTI5-like	0.190562	0.178666	2.95841	co_expression
TCONS_00000771	0	0.100431	0.903432	112165851	XM_024302548.1 Rosa chinensis TMV resistance protein N-like transcript variant X1,	0.0512997	0.080741	0.645438	co_expression
TCONS_00000771	0	0.100431	0.903432	112166193	XM_024302966.1 Rosa chinensis eukaryotic translation initiation factor 3 subunit G-like	0.079295	0.228995	1.02538	co_expression
TCONS_00000771	0	0.100431	0.903432	112166277	XM_024303079.1 Rosa chinensis oligopeptide transporter 3	3.71303	10.2691	27.5293	co_expression
TCONS_00000771	0	0.100431	0.903432	112166319	XM_024303135.1 Rosa chinensis probable WRKY transcription factor 71	0.0370123	0.075632	7.51642	co_expression
TCONS_00000771	0	0.100431	0.903432	112166858	XM_024303784.1 Rosa chinensis receptor-like protein 9DC3	0	0	0.191697	co_expression
TCONS_00000771	0	0.100431	0.903432	112166881	XM_024303805.1 Rosa chinensis cytochrome P450 CYP72A219-like transcript variant X1,	0.019556	0.0192557	0.320028	co_expression
TCONS_00000771	0	0.100431	0.903432	112167025	XM_024303980.1 Rosa chinensis chlorophyll a-b binding protein CP26, chloroplastic	0.729868	0.699812	5.99168	co_expression
TCONS_00000771	0	0.100431	0.903432	112167227	XM_024304214.1 Rosa chinensis cyclic nucleotide-gated ion channel 4	0.00795133	0	0.200768	co_expression
TCONS_00000771	0	0.100431	0.903432	112167329	XM_024304339.1 Rosa chinensis U-box domain-containing protein 7	0.139049	0.235557	0.745649	co_expression
TCONS_00000771	0	0.100431	0.903432	112167398	XM_024304412.1 Rosa chinensis F-box protein At4g22390-like transcript variant X1,	0.0345697	0	0.399427	co_expression
TCONS_00000771	0	0.100431	0.903432	112167592	XM_024304631.1 Rosa chinensis cellulose synthase-like protein E1	0.148327	0.264115	0.546368	co_expression
TCONS_00000771	0	0.100431	0.903432	112167757	XM_024304822.1 Rosa chinensis uncharacterized LOC112167757 transcript variant X1,	0.488693	0.365783	1.74742	co_expression
TCONS_00000771	0	0.100431	0.903432	112168090	XM_024305214.1 Rosa chinensis LOB domain-containing protein 4	0.308529	0.308909	7.45836	co_expression
TCONS_00000771	0	0.100431	0.903432	112168160	XM_024305287.1 Rosa chinensis cytokinin dehydrogenase 6-like	6.23877	39.1001	49.0651	co_location
TCONS_00000771	0	0.100431	0.903432	112168177	XM_024305295.1 Rosa chinensis putative methyltransferase DDB_G0268948	0.361095	0.583513	1.68858	co_expression
TCONS_00000771	0	0.100431	0.903432	112168180	XM_024305298.1 Rosa chinensis probable aminotransferase TAT2	64.5034	96.0947	221.129	co_expression
TCONS_00000771	0	0.100431	0.903432	112168223	XM_024305354.1 Rosa chinensis photosystem II protein D1	499.978	723.485	1887.38	co_expression
TCONS_00000771	0	0.100431	0.903432	112168291	XM_024305410.1 Rosa chinensis kunitz trypsin inhibitor 2-like	0.062975	0.148586	9.97898	co_expression
TCONS_00000771	0	0.100431	0.903432	112168454	XM_024305574.1 Rosa chinensis uncharacterized LOC112168454	0.496439	0.647168	2.58878	co_expression
TCONS_00000771	0	0.100431	0.903432	112168799	XM_024305719.1 Rosa chinensis BURP domain protein USPL1-like	1.9641	1.20351	7.17313	co_expression
TCONS_00000771	0	0.100431	0.903432	112169142	XM_024306122.1 Rosa chinensis auxin-responsive protein IAA29	1.47909	3.09631	8.72847	co_expression
TCONS_00000771	0	0.100431	0.903432	112169376	XM_024306403.1 Rosa chinensis cytochrome P450 703A2	0	0	0.271691	co_expression
TCONS_00000771	0	0.100431	0.903432	112170244	XM_024307452.1 Rosa chinensis pentatricopeptide repeat-containing protein At1g06143 transcript variant X1,	0.32565	0.249072	3.39428	co_expression
TCONS_00000771	0	0.100431	0.903432	112170318	XM_024307568.1 Rosa chinensis probable glutathione S-transferase	0.0217597	0.0246477	4.80559	co_expression
TCONS_00000771	0	0.100431	0.903432	112170507	XM_024307826.1 Rosa chinensis PXMP2/4 family protein 4-like	2.15094	3.01938	18.418	co_expression
TCONS_00000771	0	0.100431	0.903432	112170508	XM_024307827.1 Rosa chinensis protein TIME FOR COFFEE transcript variant X1,	0.0867723	0.175033	0.799489	co_expression
TCONS_00000771	0	0.100431	0.903432	112170518	XM_024307841.1 Rosa chinensis histone-lysine N-methyltransferase ASHR1-like transcript variant X1,	0.0454273	0.0335743	0.478625	co_expression
TCONS_00000771	0	0.100431	0.903432	112171502	XM_024308678.1 Rosa chinensis TMV resistance protein N-like	0.0389597	0.0332547	0.394777	co_expression
TCONS_00000771	0	0.100431	0.903432	112171515	XM_024308687.1 Rosa chinensis polygalacturonase-like	0	0	3.21246	co_expression
TCONS_00000771	0	0.100431	0.903432	112171959	XM_024309087.1 Rosa chinensis NPC intracellular cholesterol transporter 1-like transcript variant X1,	2.87392	2.57768	8.88324	co_expression
TCONS_00000771	0	0.100431	0.903432	112172082	XM_024309257.1 Rosa chinensis transcription factor MYB8-like	0.046011	0.195386	1.26641	co_expression
TCONS_00000771	0	0.100431	0.903432	112172125	XM_024309318.1 Rosa chinensis uncharacterized LOC112172125	0.00593733	0.0103413	2.2308	co_expression
TCONS_00000771	0	0.100431	0.903432	112172348	XM_024309648.1 Rosa chinensis DNA-directed RNA polymerase II subunit 4-like	0	0.0689937	6.1596	co_expression
TCONS_00000771	0	0.100431	0.903432	112172660	XM_024310096.1 Rosa chinensis uncharacterized LOC112172660	0.482919	1.98145	34.953	co_expression
TCONS_00000771	0	0.100431	0.903432	112172865	XM_024310363.1 Rosa chinensis chloroplast envelope quinone oxidoreductase homolog	1.91715	2.5538	9.80749	co_expression
TCONS_00000771	0	0.100431	0.903432	112173137	XM_024310704.1 Rosa chinensis alcohol dehydrogenase-like 7 transcript variant X1,	1.69505	3.07115	11.6203	co_expression
TCONS_00000771	0	0.100431	0.903432	112173152	XM_024310724.1 Rosa chinensis B3 domain-containing protein Os01g0723500-like transcript variant X1,	0.0828417	0.0310327	1.39624	co_expression
TCONS_00000771	0	0.100431	0.903432	112173176	XM_024310757.1 Rosa chinensis cytochrome P450 94A2-like	0.022815	0.0853047	3.50822	co_expression
TCONS_00000771	0	0.100431	0.903432	112173247	XM_024310835.1 Rosa chinensis TMV resistance protein N-like transcript variant X1,	0.436726	0.543982	3.29978	co_expression
TCONS_00000771	0	0.100431	0.903432	112173251	XM_024310843.1 Rosa chinensis F-box/kelch-repeat protein At3g23880-like	0.118823	0.225602	7.59118	co_expression
TCONS_00000771	0	0.100431	0.903432	112173494	XM_024311131.1 Rosa chinensis protein NRT1/ PTR FAMILY 4.4-like	0	0.006178	0.468385	co_expression
TCONS_00000771	0	0.100431	0.903432	112173665	XM_024311348.1 Rosa chinensis UDP-glycosyltransferase 73B4-like	0.0210983	0.250841	5.1597	co_expression
TCONS_00000771	0	0.100431	0.903432	112173721	XM_024311404.1 Rosa chinensis DNA-directed RNA polymerase I subunit 2 transcript variant X1,	0.925035	0.763453	5.18585	co_expression
TCONS_00000771	0	0.100431	0.903432	112173726	XM_024311408.1 Rosa chinensis GDSL esterase/lipase At1g29670-like	0.29853	0.452788	2.33352	co_expression
TCONS_00000771	0	0.100431	0.903432	112173787	XM_024311473.1 Rosa chinensis senescence-specific cysteine protease SAG39-like	0	0.003579	0.102995	co_expression
TCONS_00000771	0	0.100431	0.903432	112173884	XM_024311566.1 Rosa chinensis plastocyanin	0.540908	1.50967	5.77801	co_expression
TCONS_00000771	0	0.100431	0.903432	112173897	XM_024311590.1 Rosa chinensis uncharacterized LOC112173897	1.99903	2.75498	9.0792	co_expression
TCONS_00000771	0	0.100431	0.903432	112174266	XM_024312001.1 Rosa chinensis anti-sigma-I factor RsgI6-like	0.167216	0	1.44354	co_expression
TCONS_00000771	0	0.100431	0.903432	112174267	XM_024312002.1 Rosa chinensis ABC transporter G family member 22-like transcript variant X1,	0.264059	5.2967	32.0039	co_expression
TCONS_00000771	0	0.100431	0.903432	112174495	XM_024312269.1 Rosa chinensis neutral ceramidase 2-like	0	0	0.0234223	co_expression
TCONS_00000771	0	0.100431	0.903432	112174518	XM_024312300.1 Rosa chinensis endo-1,3;1,4-beta-D-glucanase-like	6.35331	10.9196	33.2122	co_expression
TCONS_00000771	0	0.100431	0.903432	112174586	XM_024312386.1 Rosa chinensis protein ALP1-like	0.025495	0.0312753	3.15863	co_expression
TCONS_00000771	0	0.100431	0.903432	112174777	XM_024312586.1 Rosa chinensis calcium-transporting ATPase 12, plasma membrane-type transcript variant X1,	2.73305	1.05837	11.3467	co_expression
TCONS_00000771	0	0.100431	0.903432	112175183	XM_024312849.1 Rosa chinensis uncharacterized LOC112175183 transcript variant X1,	0.309248	0.454384	2.1363	co_expression
TCONS_00000771	0	0.100431	0.903432	112175334	XM_024313007.1 Rosa chinensis disease resistance response protein 206-like	0.091747	0.067343	7.96826	co_expression
TCONS_00000771	0	0.100431	0.903432	112175368	XM_024313038.1 Rosa chinensis glutathione S-transferase U9-like transcript variant X1,	0.0892673	0.068025	0.840293	co_expression
TCONS_00000771	0	0.100431	0.903432	112175387	XM_024313057.1 Rosa chinensis primary amine oxidase-like	1.11199	1.15545	6.14309	co_expression
TCONS_00000771	0	0.100431	0.903432	112175508	XM_024313178.1 Rosa chinensis protein NRT1/ PTR FAMILY 6.3	0.0766953	0.0903133	15.6397	co_expression
TCONS_00000771	0	0.100431	0.903432	112175731	XM_024313459.1 Rosa chinensis 60S ribosomal protein L44	0.36786	0.2505	2.77126	co_expression
TCONS_00000771	0	0.100431	0.903432	112175801	XM_024313551.1 Rosa chinensis flavonoid 3'-monooxygenase-like	0.0703583	0.253552	2.22162	co_expression
TCONS_00000771	0	0.100431	0.903432	112176158	XM_024313982.1 Rosa chinensis cytochrome P450 71A26-like	0	0.433665	1.56977	co_expression
TCONS_00000771	0	0.100431	0.903432	112176184	XM_024314002.1 Rosa chinensis ferric reduction oxidase 8, mitochondrial	0.609971	5.40165	24.698	co_expression
TCONS_00000771	0	0.100431	0.903432	112176354	XM_024314228.1 Rosa chinensis uncharacterized LOC112176354	0.598367	5.03803	50.2298	co_expression
TCONS_00000771	0	0.100431	0.903432	112176502	XM_024314461.1 Rosa chinensis subtilisin-like protease SBT3.3	0.440077	0.944166	4.93432	co_expression
TCONS_00000771	0	0.100431	0.903432	112176707	XM_024314763.1 Rosa chinensis metal-nicotianamine transporter YSL1 transcript variant X1,	0.1149	0.798427	12.1072	co_expression
TCONS_00000771	0	0.100431	0.903432	112176764	XM_024314833.1 Rosa chinensis COP1-interactive protein 1-like	0.005973	0.024075	0.166112	co_expression
TCONS_00000771	0	0.100431	0.903432	112176907	XM_024315042.1 Rosa chinensis palmitoyl-monogalactosyldiacylglycerol delta-7 desaturase, chloroplastic-like	0	0	0.426265	co_expression
TCONS_00000771	0	0.100431	0.903432	112176968	XM_024315113.1 Rosa chinensis U-box domain-containing protein 19-like	2.79305	4.68794	144.203	co_expression
TCONS_00000771	0	0.100431	0.903432	112176971	--	0	0	0.051071	co_expression
TCONS_00000771	0	0.100431	0.903432	112177237	XM_024315526.1 Rosa chinensis probable glutathione S-transferase	0	0	2.12945	co_expression
TCONS_00000771	0	0.100431	0.903432	112177445	XM_024315733.1 Rosa chinensis uncharacterized LOC112177445	0.0335883	0.279838	2.54525	co_expression
TCONS_00000771	0	0.100431	0.903432	112177791	XM_024316049.1 Rosa chinensis probable non-specific lipid-transfer protein AKCS9	0.235064	0.393668	5.90921	co_expression
TCONS_00000771	0	0.100431	0.903432	112177793	XM_024316048.1 Rosa chinensis expansin-like B1	0.16524	0.0358307	7.59461	co_expression
TCONS_00000771	0	0.100431	0.903432	112177808	XM_024316061.1 Rosa chinensis NAC domain-containing protein 67-like	0.00190333	0.00923233	0.272048	co_expression
TCONS_00000771	0	0.100431	0.903432	112177840	XM_024316090.1 Rosa chinensis probable LRR receptor-like serine/threonine-protein kinase At1g56140	0.0494887	0.0565257	0.386655	co_expression
TCONS_00000771	0	0.100431	0.903432	112177922	XM_024316159.1 Rosa chinensis uncharacterized LOC112177922 partial	0.092961	1.5738	6.39747	co_expression
TCONS_00000771	0	0.100431	0.903432	112177927	--	0.132354	5.34114	34.6594	co_expression
TCONS_00000771	0	0.100431	0.903432	112178018	XM_024316239.1 Rosa chinensis WAT1-related protein At1g25270-like	0	0.016863	0.148836	co_expression
TCONS_00000771	0	0.100431	0.903432	112178062	XM_024316299.1 Rosa chinensis uncharacterized LOC112178062	0.47229	18.731	126.32	co_expression
TCONS_00000771	0	0.100431	0.903432	112178289	XM_024316450.1 Rosa chinensis acyl-CoA 5-desaturase AL21-like partial	0	0	0.366536	co_expression
TCONS_00000771	0	0.100431	0.903432	112178337	XM_024316493.1 Rosa chinensis uncharacterized LOC112178337	0	0	0.963303	co_expression
TCONS_00000771	0	0.100431	0.903432	112178610	XM_024316780.1 Rosa chinensis receptor-like protein EIX2 transcript variant X1,	0.135819	0.0923097	3.06626	co_expression
TCONS_00000771	0	0.100431	0.903432	112178612	XM_024316784.1 Rosa chinensis beta-amylase 3, chloroplastic	0.209342	0.105921	1.82194	co_expression
TCONS_00000771	0	0.100431	0.903432	112178836	XM_024317071.1 Rosa chinensis plant intracellular Ras-group-related LRR protein 5-like transcript variant X1,	1.81183	3.17059	14.1804	co_expression
TCONS_00000771	0	0.100431	0.903432	112179088	XM_024317410.1 Rosa chinensis glutathione S-transferase U10-like	0	0	0.0444163	co_expression
TCONS_00000771	0	0.100431	0.903432	112179289	XM_024317667.1 Rosa chinensis probable glycerol-3-phosphate acyltransferase 3	0.390924	3.15271	88.8301	co_expression
TCONS_00000771	0	0.100431	0.903432	112179348	XM_024317747.1 Rosa chinensis uncharacterized protein At4g14100-like	0.112037	0.070083	0.72171	co_expression
TCONS_00000771	0	0.100431	0.903432	112179353	XM_024317751.1 Rosa chinensis LEAF RUST 10 DISEASE-RESISTANCE LOCUS RECEPTOR-LIKE PROTEIN KINASE-like 1.2 transcript variant X1,	0.110298	0.262512	3.71963	co_expression
TCONS_00000771	0	0.100431	0.903432	112179554	XM_024318013.1 Rosa chinensis (-)-isopiperitenol/(-)-carveol dehydrogenase, mitochondrial-like	0.00949433	0.117486	0.643927	co_expression
TCONS_00000771	0	0.100431	0.903432	112179707	XM_024318170.1 Rosa chinensis wall-associated receptor kinase-like 22	0	0	0.126254	co_expression
TCONS_00000771	0	0.100431	0.903432	112179936	XM_024318428.1 Rosa chinensis (R,S)-reticuline 7-O-methyltransferase-like	0	0	0.236779	co_expression
TCONS_00000771	0	0.100431	0.903432	112180113	XM_024318620.1 Rosa chinensis NDR1/HIN1-like protein 6	1.26524	4.54643	31.8825	co_expression
TCONS_00000771	0	0.100431	0.903432	112180272	XM_024318802.1 Rosa chinensis protein DMP3	0.068481	0.661319	4.58266	co_expression
TCONS_00000771	0	0.100431	0.903432	112180290	XM_024318818.1 Rosa chinensis disease resistance protein RGA2-like transcript variant X1,	1.39906	1.74316	7.28669	co_expression
TCONS_00000771	0	0.100431	0.903432	112180566	XM_024319121.1 Rosa chinensis probable serine/threonine-protein kinase PBL11	0	0.00953633	0.503874	co_expression
TCONS_00000771	0	0.100431	0.903432	112180959	XM_024319547.1 Rosa chinensis salutaridine reductase-like	0.0432233	0.392631	1.23872	co_expression
TCONS_00000771	0	0.100431	0.903432	112181007	XM_024319617.1 Rosa chinensis GDSL esterase/lipase 3-like transcript variant X1,	0.266154	15.4085	54.5831	co_expression
TCONS_00000771	0	0.100431	0.903432	112181008	XM_024319619.1 Rosa chinensis GDSL esterase/lipase 1-like	0.077596	2.64623	11.3278	co_expression
TCONS_00000771	0	0.100431	0.903432	112181277	--	0.00455167	0	0.21286	co_expression
TCONS_00000771	0	0.100431	0.903432	112181590	XM_024319966.1 Rosa chinensis putative disease resistance protein RGA1	0.020579	0.049782	0.723799	co_expression
TCONS_00000771	0	0.100431	0.903432	112181639	--	0.0335193	0.0834597	1.17872	co_expression
TCONS_00000771	0	0.100431	0.903432	112181748	XM_024320136.1 Rosa chinensis protein IQ-DOMAIN 14 transcript variant X1,	7.83564	9.42729	2.16977	co_location
TCONS_00000771	0	0.100431	0.903432	112181795	XM_024320196.1 Rosa chinensis 60S acidic ribosomal protein P1	1.3248	41.6569	141.962	co_expression
TCONS_00000771	0	0.100431	0.903432	112181980	XM_024320392.1 Rosa chinensis protein TSS transcript variant X1,	0.755471	0.666593	3.49177	co_expression
TCONS_00000771	0	0.100431	0.903432	112181992	XM_024320415.1 Rosa chinensis calcineurin B-like protein 7 transcript variant X1,	0.194034	0.258537	2.85696	co_expression
TCONS_00000771	0	0.100431	0.903432	112182186	XM_024320635.1 Rosa chinensis synaptotagmin-3 transcript variant X1,	0	0	0.166398	co_expression
TCONS_00000771	0	0.100431	0.903432	112182344	XM_024320825.1 Rosa chinensis uncharacterized LOC112182344 transcript variant X1,	0.0119417	0.311029	1.76062	co_expression
TCONS_00000771	0	0.100431	0.903432	112182428	--	0.478833	0.257899	4.49164	co_expression
TCONS_00000771	0	0.100431	0.903432	112182507	XM_024321001.1 Rosa chinensis glutathione transferase GST 23-like	0.207048	0.578502	3.25853	co_expression
TCONS_00000771	0	0.100431	0.903432	112182730	XM_024321264.1 Rosa chinensis receptor-like cytoplasmic kinase 176 transcript variant X1,	0.239501	0.327765	1.50751	co_expression
TCONS_00000771	0	0.100431	0.903432	112182940	XM_024321501.1 Rosa chinensis auxin transporter-like protein 2 transcript variant X1,	1.60252	4.09707	20.3123	co_expression
TCONS_00000771	0	0.100431	0.903432	112182967	XM_024321542.1 Rosa chinensis phosphoinositide phospholipase C 6-like	0.128045	0.195573	0.943203	co_expression
TCONS_00000771	0	0.100431	0.903432	112182977	XM_024321562.1 Rosa chinensis probable LRR receptor-like serine/threonine-protein kinase At3g47570 transcript variant X1,	0	0.010792	0.0827193	co_expression
TCONS_00000771	0	0.100431	0.903432	112183358	XM_024321712.1 Rosa chinensis stress-induced protein KIN2-like	0	0.469975	2.39787	co_expression
TCONS_00000771	0	0.100431	0.903432	112183435	XM_024321817.1 Rosa chinensis uncharacterized LOC112183435	4.18861	5.10256	14.8282	co_expression
TCONS_00000771	0	0.100431	0.903432	112183508	XM_024321895.1 Rosa chinensis probable protein phosphatase 2C 8 transcript variant X1,	0.567466	1.90796	12.3104	co_expression
TCONS_00000771	0	0.100431	0.903432	112183596	XM_024321972.1 Rosa chinensis G-type lectin S-receptor-like serine/threonine-protein kinase At1g61460	4.39184	5.16018	4.93416	co_location
TCONS_00000771	0	0.100431	0.903432	112183887	XM_024322206.1 Rosa chinensis uncharacterized LOC112183887	0.8983	4.65122	43.4345	co_expression
TCONS_00000771	0	0.100431	0.903432	112183985	XM_024322300.1 Rosa chinensis protein ALP1-like	0.0534573	0.0256717	0.774586	co_expression
TCONS_00000771	0	0.100431	0.903432	112184151	--	0.01488	0.0280637	0.314013	co_expression
TCONS_00000771	0	0.100431	0.903432	112184303	XM_024322568.1 Rosa chinensis homeobox-leucine zipper protein ATHB-12-like transcript variant X1,	0.741521	12.0847	185.881	co_expression
TCONS_00000771	0	0.100431	0.903432	112184521	XM_024322790.1 Rosa chinensis uncharacterized LOC112184521	0.735545	6.59783	30.0006	co_expression
TCONS_00000771	0	0.100431	0.903432	112184591	XM_024322852.1 Rosa chinensis NDR1/HIN1-like protein 26	0.104053	0.730437	9.97499	co_expression
TCONS_00000771	0	0.100431	0.903432	112184956	XM_024323177.1 Rosa chinensis uncharacterized LOC112184956	0	0	0.159127	co_expression
TCONS_00000771	0	0.100431	0.903432	112185088	XM_024323299.1 Rosa chinensis coatomer subunit beta'-1-like	0.567967	1.13449	14.9627	co_expression
TCONS_00000771	0	0.100431	0.903432	112185089	XM_024323300.1 Rosa chinensis coatomer subunit beta'-1-like	0	0.0482463	3.83873	co_expression
TCONS_00000771	0	0.100431	0.903432	112185404	XM_024323645.1 Rosa chinensis protein phosphatase 2C 77-like	0.684271	0.958539	49.4625	co_expression
TCONS_00000771	0	0.100431	0.903432	112185586	XM_024323845.1 Rosa chinensis protein SRG1-like	0.0915973	0.505046	5.18262	co_expression
TCONS_00000771	0	0.100431	0.903432	112186068	XM_024324426.1 Rosa chinensis long chain acyl-CoA synthetase 8-like	0.197107	0.443931	5.95748	co_expression
TCONS_00000771	0	0.100431	0.903432	112186380	XM_024324775.1 Rosa chinensis probable caffeoyl-CoA O-methyltransferase At4g26220 transcript variant X1,	1.30772	0.784718	16.466	co_expression
TCONS_00000771	0	0.100431	0.903432	112186427	XM_024324858.1 Rosa chinensis protein NUCLEAR FUSION DEFECTIVE 4 transcript variant X1,	0.098596	0.633132	2.95901	co_expression
TCONS_00000771	0	0.100431	0.903432	112186456	XM_024324894.1 Rosa chinensis aminopeptidase M1-like transcript variant X1,	0.0906577	0.142563	1.71139	co_expression
TCONS_00000771	0	0.100431	0.903432	112186473	XM_024324922.1 Rosa chinensis F-box protein SKIP1	49.7788	78.4247	124.172	co_expression
TCONS_00000771	0	0.100431	0.903432	112186570	XM_024325034.1 Rosa chinensis receptor like protein 7-like transcript variant X1,	0.162957	0.274099	2.09596	co_expression
TCONS_00000771	0	0.100431	0.903432	112186612	XM_024325078.1 Rosa chinensis dynein light chain 1, cytoplasmic-like	6.25399	5.14464	34.1019	co_expression
TCONS_00000771	0	0.100431	0.903432	112187009	XM_024325614.1 Rosa chinensis aldehyde dehydrogenase family 3 member H1-like transcript variant X1,	0.349933	0.810239	6.17116	co_expression
TCONS_00000771	0	0.100431	0.903432	112187155	XM_024325820.1 Rosa chinensis heat shock factor protein HSF24	1.84523	1.8868	53.5752	co_expression
TCONS_00000771	0	0.100431	0.903432	112187243	XM_024325956.1 Rosa chinensis uncharacterized LOC112187243	0	0	0.0207377	co_expression
TCONS_00000771	0	0.100431	0.903432	112187474	XM_024326275.1 Rosa chinensis periodic tryptophan protein 2	0.646054	0.35405	2.92356	co_expression
TCONS_00000771	0	0.100431	0.903432	112187813	XM_024326759.1 Rosa chinensis dirigent protein 23-like	0.0223443	0.0128953	0.276199	co_expression
TCONS_00000771	0	0.100431	0.903432	112187896	XM_024326860.1 Rosa chinensis 7-deoxyloganetin glucosyltransferase-like	0.448429	0.88754	5.14581	co_expression
TCONS_00000771	0	0.100431	0.903432	112188242	XM_024327323.1 Rosa chinensis beta-amyrin synthase-like	0.011655	0.128356	2.09684	co_expression
TCONS_00000771	0	0.100431	0.903432	112188507	XM_024327629.1 Rosa chinensis protein TIC 20-IV, chloroplastic transcript variant X1,	0.443118	5.79045	18.3431	co_expression
TCONS_00000771	0	0.100431	0.903432	112188712	XM_024327888.1 Rosa chinensis transcription factor TGA4-like transcript variant X1,	0.009255	0.315115	3.48308	co_expression
TCONS_00000771	0	0.100431	0.903432	112188730	--	0.304501	0.576719	1.44247	co_expression
TCONS_00000771	0	0.100431	0.903432	112189000	XM_024328252.1 Rosa chinensis F-box/LRR-repeat protein 4	2.93576	5.58795	13.3786	co_expression
TCONS_00000771	0	0.100431	0.903432	112189030	--	1.96216	1.71507	0.945668	co_expression
TCONS_00000771	0	0.100431	0.903432	112189040	XM_024328304.1 Rosa chinensis laccase-15-like	0.0163593	0	1.74329	co_expression
TCONS_00000771	0	0.100431	0.903432	112189180	XM_024328457.1 Rosa chinensis codeine O-demethylase-like	0.15177	5.75225	35.6754	co_expression
TCONS_00000771	0	0.100431	0.903432	112189352	XM_024328667.1 Rosa chinensis ankyrin repeat-containing protein ITN1-like transcript variant X1,	0.322812	0.35	0.0566943	co_expression
TCONS_00000771	0	0.100431	0.903432	112189571	XM_024328916.1 Rosa chinensis auxin-binding protein ABP19a-like	7.70263	6.87632	47.9639	co_expression
TCONS_00000771	0	0.100431	0.903432	112189645	XM_024328992.1 Rosa chinensis uncharacterized LOC112189645	0	0.560511	2.08177	co_expression
TCONS_00000771	0	0.100431	0.903432	112189762	XM_024329111.1 Rosa chinensis pre- cleavage factor Im 25 kDa subunit 1 mRNA	0.37947	0.309393	3.18445	co_expression
TCONS_00000771	0	0.100431	0.903432	112190146	XM_024329563.1 Rosa chinensis aldehyde dehydrogenase family 2 member C4-like	0.0197243	0.0221187	4.05893	co_expression
TCONS_00000771	0	0.100431	0.903432	112190201	XM_024329624.1 Rosa chinensis salicylic acid-binding protein 2-like	2.51796	29.2751	239.55	co_expression
TCONS_00000771	0	0.100431	0.903432	112190372	XM_024329808.1 Rosa chinensis 12-oxophytodienoate reductase 2-like	0.0134107	1.17308	7.92915	co_expression
TCONS_00000771	0	0.100431	0.903432	112190401	XM_024329831.1 Rosa chinensis cytokinin hydroxylase-like	0	0.0101633	0.112826	co_expression
TCONS_00000771	0	0.100431	0.903432	112191883	XM_024331360.1 Rosa chinensis protein NRT1/ PTR FAMILY 8.2-like transcript variant X1,	0.444736	0.186231	2.29211	co_expression
TCONS_00000771	0	0.100431	0.903432	112192007	XM_024331516.1 Rosa chinensis glucan endo-1,3-beta-glucosidase, basic isoform-like	0	0	0.229799	co_expression
TCONS_00000771	0	0.100431	0.903432	112192051	XM_024331572.1 Rosa chinensis tetraketide alpha-pyrone reductase 1-like	0	0.0101833	0.259852	co_expression
TCONS_00000771	0	0.100431	0.903432	112192190	XM_024331783.1 Rosa chinensis uncharacterized LOC112192190 transcript variant X1,	0	0.148726	1.36392	co_expression
TCONS_00000771	0	0.100431	0.903432	112192197	--	0	0.0357457	0.949324	co_expression
TCONS_00000771	0	0.100431	0.903432	112192257	XM_024331912.1 Rosa chinensis probable WRKY transcription factor 23	0.0428217	0.0350623	0.7863	co_expression
TCONS_00000771	0	0.100431	0.903432	112192325	XM_024331987.1 Rosa chinensis aldehyde dehydrogenase family 2 member C4-like	0	0.016978	0.811966	co_expression
TCONS_00000771	0	0.100431	0.903432	112192377	XM_024332075.1 Rosa chinensis probable leucine-rich repeat receptor-like protein kinase At5g49770	0.00993667	0.0380347	1.08871	co_expression
TCONS_00000771	0	0.100431	0.903432	112192707	XM_024332557.1 Rosa chinensis probable glutathione S-transferase	0.189367	4.28775	29.4298	co_expression
TCONS_00000771	0	0.100431	0.903432	112192730	XM_024332589.1 Rosa chinensis RING-H2 finger protein ATL5-like	0.013883	0.0588513	2.70665	co_expression
TCONS_00000771	0	0.100431	0.903432	112192821	XM_024332703.1 Rosa chinensis thaumatin-like protein 1b	0.795831	1.60212	413.985	co_expression
TCONS_00000771	0	0.100431	0.903432	112192856	XM_024332758.1 Rosa chinensis aquaporin PIP2-1-like	5.04519	21.3385	104.743	co_expression
TCONS_00000771	0	0.100431	0.903432	112192865	XM_024332769.1 Rosa chinensis uncharacterized LOC112192865	16.6268	16.8154	62.5873	co_expression
TCONS_00000771	0	0.100431	0.903432	112192999	XM_024332986.1 Rosa chinensis cytochrome P450 714C2-like	0.370572	0.437206	8.17331	co_expression
TCONS_00000771	0	0.100431	0.903432	112193024	XM_024333029.1 Rosa chinensis F-box/LRR-repeat protein At4g14103-like	0.585902	0.700795	1.87629	co_expression
TCONS_00000771	0	0.100431	0.903432	112193031	XM_024333040.1 Rosa chinensis glucan endo-1,3-beta-glucosidase-like	0.0354143	0.4039	14.6089	co_expression
TCONS_00000771	0	0.100431	0.903432	112193303	XM_024333382.1 Rosa chinensis gibberellin 2-beta-dioxygenase 2	0	0.0493753	0.685867	co_expression
TCONS_00000771	0	0.100431	0.903432	112193489	XM_024333661.1 Rosa chinensis glutamate decarboxylase 1	10.896	56.5826	463.755	co_expression
TCONS_00000771	0	0.100431	0.903432	112193611	XM_024333814.1 Rosa chinensis probable LRR receptor-like serine/threonine-protein kinase At5g63710 transcript variant X1,	0.768482	1.66996	10.213	co_expression
TCONS_00000771	0	0.100431	0.903432	112193923	XM_024334187.1 Rosa chinensis uncharacterized LOC112193923	1.1649	7.40299	30.8458	co_expression
TCONS_00000771	0	0.100431	0.903432	112194063	XM_024334325.1 Rosa chinensis uncharacterized LOC112194063	0	0.0421237	0.392088	co_expression
TCONS_00000771	0	0.100431	0.903432	112194080	XM_024334585.1 Rosa chinensis uncharacterized LOC112194080 transcript variant X1,	0.0659757	0.148029	5.03342	co_expression
TCONS_00000771	0	0.100431	0.903432	112194457	XM_024334694.1 Rosa chinensis ornithine decarboxylase-like	0	0.13215	8.3751	co_expression
TCONS_00000771	0	0.100431	0.903432	112194523	XM_024334752.1 Rosa chinensis protein ALP1-like	0	0.0434067	2.41835	co_expression
TCONS_00000771	0	0.100431	0.903432	112194770	XM_024334996.1 Rosa chinensis chymomexicain-like transcript variant X1,	0.0278267	0.518527	16.1858	co_expression
TCONS_00000771	0	0.100431	0.903432	112194832	XM_024335071.1 Rosa chinensis chymomexicain-like transcript variant X1,	0.0360583	0.513085	15.0557	co_expression
TCONS_00000771	0	0.100431	0.903432	112194853	XM_024335092.1 Rosa chinensis probable WRKY transcription factor 49	0	0	0.135948	co_expression
TCONS_00000771	0	0.100431	0.903432	112195200	XM_024335567.1 Rosa chinensis uncharacterized LOC112195200	0	0	0.313657	co_expression
TCONS_00000771	0	0.100431	0.903432	112195238	XM_024335613.1 Rosa chinensis uncharacterized LOC112195238	0.60026	0.740855	3.86531	co_expression
TCONS_00000771	0	0.100431	0.903432	112195300	XM_024335707.1 Rosa chinensis WAT1-related protein At5g07050-like	2.92793	10.2657	66.0063	co_expression
TCONS_00000771	0	0.100431	0.903432	112195370	XM_024335782.1 Rosa chinensis cationic peroxidase 1-like	0.565216	3.24887	77.9294	co_expression
TCONS_00000771	0	0.100431	0.903432	112195787	XM_024335986.1 Rosa chinensis E3 ubiquitin-protein ligase RGLG2-like	0.015166	0.0222347	0.726875	co_expression
TCONS_00000771	0	0.100431	0.903432	112195959	XM_024336202.1 Rosa chinensis vinorine synthase-like	0.031939	0.857265	3.21469	co_expression
TCONS_00000771	0	0.100431	0.903432	112195984	XM_024336244.1 Rosa chinensis sugar transport protein 13-like	0.163534	0.77899	22.4236	co_expression
TCONS_00000771	0	0.100431	0.903432	112196253	XM_024336568.1 Rosa chinensis uncharacterized LOC112196253 transcript variant X1,	0.0371943	0.0770553	0.365645	co_expression
TCONS_00000771	0	0.100431	0.903432	112196419	XM_024336772.1 Rosa chinensis homeobox protein knotted-1-like 1	0.045096	0	1.4153	co_expression
TCONS_00000771	0	0.100431	0.903432	112196516	XM_024336884.1 Rosa chinensis GTP 3',8-cyclase, mitochondrial transcript variant X1,	5.81819	6.3781	13.5352	co_expression
TCONS_00000771	0	0.100431	0.903432	112196740	XM_024337158.1 Rosa chinensis 1-aminocyclopropane-1-carboxylate oxidase homolog 1-like	0.428287	1.11234	9.71553	co_expression
TCONS_00000771	0	0.100431	0.903432	112196791	XM_024337235.1 Rosa chinensis glycosyltransferase-like KOBITO 1	53.8518	28.3889	43.1477	co_location
TCONS_00000771	0	0.100431	0.903432	112196795	XM_024337247.1 Rosa chinensis bifunctional endo-1,4-beta-xylanase XylA-like	1.37094	1.04232	1.12557	co_location
TCONS_00000771	0	0.100431	0.903432	112196804	XM_024337254.1 Rosa chinensis uncharacterized LOC112196804	1.1117	0.497788	1.12451	co_location
TCONS_00000771	0	0.100431	0.903432	112196934	XM_024337415.1 Rosa chinensis F-box protein At1g70590	565.606	1082.69	2792.51	co_expression
TCONS_00000771	0	0.100431	0.903432	112196951	XM_024337452.1 Rosa chinensis putative beta-D-xylosidase	10.3274	493.123	3829.23	co_expression
TCONS_00000771	0	0.100431	0.903432	112196965	XM_024337471.1 Rosa chinensis pectinesterase	1.07191	39.6451	494.09	co_expression
TCONS_00000771	0	0.100431	0.903432	112196971	XM_024337478.1 Rosa chinensis uncharacterized LOC112196971	0	0.0207587	1.10064	co_expression
TCONS_00000771	0	0.100431	0.903432	112197239	XM_024337858.1 Rosa chinensis protein SIEVE ELEMENT OCCLUSION B-like	0.0174797	0.009056	0.380145	co_expression
TCONS_00000771	0	0.100431	0.903432	112197429	XM_024338095.1 Rosa chinensis putative glutamine amidotransferase GAT1_2.1	0.605308	1.96328	22.398	co_expression
TCONS_00000771	0	0.100431	0.903432	112197646	XM_024338398.1 Rosa chinensis ACD11 homolog protein	0.0774083	0.791814	5.3225	co_expression
TCONS_00000771	0	0.100431	0.903432	112197789	XM_024338622.1 Rosa chinensis uncharacterized LOC112197789	4.37403	7.80681	24.5965	co_expression
TCONS_00000771	0	0.100431	0.903432	112197900	XM_024338858.1 Rosa chinensis VAN3-binding protein	0.19957	9.65827	80.3516	co_expression
TCONS_00000771	0	0.100431	0.903432	112198230	XM_024339314.1 Rosa chinensis extracellular ribonuclease LE-like	0.155076	0.424205	3.68363	co_expression
TCONS_00000771	0	0.100431	0.903432	112198316	XM_024339419.1 Rosa chinensis cell number regulator 2-like	9.04261	24.4411	78.958	co_expression
TCONS_00000771	0	0.100431	0.903432	112198573	XM_024339728.1 Rosa chinensis U-box domain-containing protein 35-like	0	0.301126	2.95654	co_expression
TCONS_00000771	0	0.100431	0.903432	112198728	XM_024339849.1 Rosa chinensis protein ALP1-like	0.0169983	0.00262033	1.55103	co_expression
TCONS_00000771	0	0.100431	0.903432	112198731	XM_024339852.1 Rosa chinensis early nodulin-75-like	0.174314	0.117976	1.38978	co_expression
TCONS_00000771	0	0.100431	0.903432	112199150	XM_024340211.1 Rosa chinensis receptor-like serine/threonine-protein kinase SD1-8	0	0.0151757	0.449581	co_expression
TCONS_00000771	0	0.100431	0.903432	112199286	XM_024340324.1 Rosa chinensis G-type lectin S-receptor-like serine/threonine-protein kinase SD1-29	0	0	0	co_location
TCONS_00000771	0	0.100431	0.903432	112199302	--	0	0	0	co_location
TCONS_00000771	0	0.100431	0.903432	112199312	XM_024340346.1 Rosa chinensis G-type lectin S-receptor-like serine/threonine-protein kinase SD1-29	0	0	0	co_location
TCONS_00000771	0	0.100431	0.903432	112199318	--	7.24515	8.69787	9.24321	co_location
TCONS_00000771	0	0.100431	0.903432	112199327	XM_024340359.1 Rosa chinensis G-type lectin S-receptor-like serine/threonine-protein kinase At1g61550	2.62721	2.23359	2.41886	co_location
TCONS_00000771	0	0.100431	0.903432	112199332	XM_024340366.1 Rosa chinensis pentatricopeptide repeat-containing protein At4g20740 partial	2.35979	1.43594	2.59844	co_location
TCONS_00000771	0	0.100431	0.903432	112199341	XM_024340374.1 Rosa chinensis uncharacterized LOC112199341	0.055976	0.0162417	0	co_location
TCONS_00000771	0	0.100431	0.903432	112199351	XM_024340384.1 Rosa chinensis transcription initiation factor TFIID subunit 4b-like	0	0	0	co_location
TCONS_00000771	0	0.100431	0.903432	112199361	XM_024340392.1 Rosa chinensis TMV resistance protein N-like	0.510072	0.453553	0.490681	co_location
TCONS_00000771	0	0.100431	0.903432	112199566	--	0.008312	0.0523803	0.786304	co_expression
TCONS_00000771	0	0.100431	0.903432	112199792	--	0	0	0.14476	co_expression
TCONS_00000771	0	0.100431	0.903432	112200123	XM_024341135.1 Rosa chinensis CASP-like protein 2C1	15.7281	29.2126	154.905	co_expression
TCONS_00000771	0	0.100431	0.903432	112200146	XM_024341162.1 Rosa chinensis homeobox-leucine zipper protein HAT22-like	0.114145	1.10329	15.1948	co_expression
TCONS_00000771	0	0.100431	0.903432	112200201	XM_024341225.1 Rosa chinensis uncharacterized LOC112200201	1.13189	1.45715	10.6515	co_expression
TCONS_00000771	0	0.100431	0.903432	112200247	XM_024341277.1 Rosa chinensis solute carrier family 35 member F1-like	2.91483	3.66376	8.37	co_expression
TCONS_00000771	0	0.100431	0.903432	112200417	XM_024341449.1 Rosa chinensis protein PLANT CADMIUM RESISTANCE 2-like	0.593977	1.24812	8.50503	co_expression
TCONS_00000771	0	0.100431	0.903432	112200969	XM_024341978.1 Rosa chinensis cytochrome P450 CYP749A22-like	0.041878	0.648137	3.35609	co_expression
TCONS_00000771	0	0.100431	0.903432	112200989	XM_024341996.1 Rosa chinensis putative glycine-rich cell wall structural protein 1 transcript variant X1,	0.505921	0.505992	4.3684	co_expression
TCONS_00000771	0	0.100431	0.903432	112201963	XM_024342890.1 Rosa chinensis glucan endo-1,3-beta-glucosidase-like	0.788142	5.44709	73.7872	co_expression
TCONS_00000771	0	0.100431	0.903432	112201986	XM_024342910.1 Rosa chinensis indole-3-acetaldehyde oxidase-like	6.72834	4.42791	21.1967	co_expression
TCONS_00000771	0	0.100431	0.903432	112202273	XM_024343214.1 Rosa chinensis uncharacterized LOC112202273	0	0.0358347	0.258171	co_expression
TCONS_00000771	0	0.100431	0.903432	112202300	XM_024343245.1 Rosa chinensis nudix hydrolase 10-like transcript variant X1,	0.48179	5.41995	103.21	co_expression
TCONS_00000771	0	0.100431	0.903432	112202340	XM_024343327.1 Rosa chinensis uncharacterized protein At2g29880-like	0.1095	0.129359	0.825428	co_expression
TCONS_00000771	0	0.100431	0.903432	112202453	XM_024343465.1 Rosa chinensis scarecrow-like protein 14	0	0	0.029351	co_expression
TCONS_00000771	0	0.100431	0.903432	112202533	XM_024343542.1 Rosa chinensis ABC transporter C family member 3-like	0.058203	0.69796	11.7315	co_expression
TCONS_00000771	0	0.100431	0.903432	112202738	XM_024343746.1 Rosa chinensis uncharacterized LOC112202738	0.0179697	0.0487787	0.257448	co_expression
TCONS_00000771	0	0.100431	0.903432	112202800	XM_024343809.1 Rosa chinensis transcription factor bHLH30-like	1.0256	1.04732	7.16729	co_expression
TCONS_00000771	0	0.100431	0.903432	112202833	XM_024343848.1 Rosa chinensis G-type lectin S-receptor-like serine/threonine-protein kinase SD1-1	0.024958	0.0214083	0.42497	co_expression
TCONS_00000771	0	0.100431	0.903432	112203248	XM_024344241.1 Rosa chinensis receptor-like protein EIX2	0.00667233	0.021448	0.302788	co_expression
TCONS_00000771	0	0.100431	0.903432	112203261	XM_024344251.1 Rosa chinensis receptor-like protein EIX2	0.0101277	0.0537513	0.424948	co_expression
TCONS_00000771	0	0.100431	0.903432	112203959	XM_024344853.1 Rosa chinensis lupeol synthase-like	0	0	0.129943	co_expression
TCONS_00000771	0	0.100431	0.903432	112203992	XM_024344881.1 Rosa chinensis nudix hydrolase 10-like	1.7701	7.0492	116.648	co_expression
TCONS_00000830	1.14767	0.275608	0.155401	112165759	XM_024302397.1 Rosa chinensis UDP-glycosyltransferase 87A1-like	16.0576	6.54205	2.65328	co_expression
TCONS_00000830	1.14767	0.275608	0.155401	112165863	XM_024302563.1 Rosa chinensis protein argonaute 5-like	137.626	30.2501	20.0754	co_expression
TCONS_00000830	1.14767	0.275608	0.155401	112166453	XM_024303297.1 Rosa chinensis uncharacterized LOC112166453 transcript variant X1,	2.24322	0.665217	0.410332	co_expression
TCONS_00000830	1.14767	0.275608	0.155401	112167078	XM_024304037.1 Rosa chinensis uncharacterized LOC112167078	0.365605	0.058414	0.0257617	co_expression
TCONS_00000830	1.14767	0.275608	0.155401	112167468	XM_024304498.1 Rosa chinensis DDT domain-containing protein PTM transcript variant X1,	19.6365	12.562	10.7501	co_expression
TCONS_00000830	1.14767	0.275608	0.155401	112167474	XM_024304503.1 Rosa chinensis NAC domain-containing protein 86	0.193404	0	0	co_expression
TCONS_00000830	1.14767	0.275608	0.155401	112167572	XM_024304609.1 Rosa chinensis peptidyl-prolyl cis-trans isomerase FKBP12-like transcript variant X1,	0.345357	0	0	co_expression
TCONS_00000830	1.14767	0.275608	0.155401	112167846	XM_024304936.1 Rosa chinensis uncharacterized LOC112167846 transcript variant X1,	41.8194	2.72947	2.05057	co_expression
TCONS_00000830	1.14767	0.275608	0.155401	112171365	--	1.82554	0.324926	0.310825	co_expression
TCONS_00000830	1.14767	0.275608	0.155401	112171576	XM_024308738.1 Rosa chinensis chloroplast stem-loop binding protein of 41 kDa a, chloroplastic	1.60332	0.227686	0.102743	co_expression
TCONS_00000830	1.14767	0.275608	0.155401	112171965	XM_024309094.1 Rosa chinensis NADH-ubiquinone oxidoreductase chain 1	482.337	335.542	290.723	co_expression
TCONS_00000830	1.14767	0.275608	0.155401	112172190	XM_024309434.1 Rosa chinensis uncharacterized LOC112172190	0.471654	0.0186817	0.044275	co_expression
TCONS_00000830	1.14767	0.275608	0.155401	112172380	XM_024309699.1 Rosa chinensis cysteine protease XCP1-like	0.247262	0	0	co_expression
TCONS_00000830	1.14767	0.275608	0.155401	112172950	XM_024310469.1 Rosa chinensis uncharacterized LOC112172950 transcript variant X1,	31.6419	17.1042	12.9312	co_expression
TCONS_00000830	1.14767	0.275608	0.155401	112173083	XM_024310630.1 Rosa chinensis laccase-11-like	2.12183	0.19566	0	co_expression
TCONS_00000830	1.14767	0.275608	0.155401	112173604	XM_024311286.1 Rosa chinensis uncharacterized LOC112173604	0.430698	0.0236233	0.040886	co_expression
TCONS_00000830	1.14767	0.275608	0.155401	112173807	XM_024311494.1 Rosa chinensis cytochrome P450 714C2-like	0.379997	0.019832	0.040694	co_expression
TCONS_00000830	1.14767	0.275608	0.155401	112174023	XM_024311720.1 Rosa chinensis peptidyl-prolyl cis-trans isomerase FKBP20-2, chloroplastic	1.69918	0.015808	0.022524	co_expression
TCONS_00000830	1.14767	0.275608	0.155401	112174282	XM_024312024.1 Rosa chinensis probable GMP synthase [glutamine-hydrolyzing]	0.76851	0	0	co_expression
TCONS_00000830	1.14767	0.275608	0.155401	112175200	XM_024312864.1 Rosa chinensis uncharacterized LOC112175200 transcript variant X1,	27.3665	10.6526	10.708	co_expression
TCONS_00000830	1.14767	0.275608	0.155401	112176102	XM_024313924.1 Rosa chinensis glycerol-3-phosphate acyltransferase, chloroplastic	70.015	30.6552	17.6507	co_expression
TCONS_00000830	1.14767	0.275608	0.155401	112177160	XM_024315382.1 Rosa chinensis transcription factor KUA1 transcript variant X1,	151.225	63.5837	53.5451	co_expression
TCONS_00000830	1.14767	0.275608	0.155401	112178095	XM_024316305.1 Rosa chinensis uncharacterized LOC112178095	1.1759	0.438641	0.226953	co_expression
TCONS_00000830	1.14767	0.275608	0.155401	112178419	XM_024316568.1 Rosa chinensis PHD finger protein ALFIN-LIKE 4-like	0.940362	0.0467017	0.0332463	co_expression
TCONS_00000830	1.14767	0.275608	0.155401	112179385	XM_024317783.1 Rosa chinensis probable rhamnogalacturonate lyase B	2.14119	0.054752	0.0424587	co_expression
TCONS_00000830	1.14767	0.275608	0.155401	112179747	XM_024318222.1 Rosa chinensis ankyrin-2-like transcript variant X1,	0.233272	0.034866	0.0157317	co_expression
TCONS_00000830	1.14767	0.275608	0.155401	112179997	XM_024318478.1 Rosa chinensis uncharacterized LOC112179997 transcript variant X1,	7.72272	4.70198	4.28562	co_expression
TCONS_00000830	1.14767	0.275608	0.155401	112181664	XM_024320045.1 Rosa chinensis DNA replication complex GINS protein PSF3-like	0.0765933	0	0	co_expression
TCONS_00000830	1.14767	0.275608	0.155401	112182061	XM_024320492.1 Rosa chinensis uncharacterized LOC112182061	1.26645	0.607182	0.562148	co_expression
TCONS_00000830	1.14767	0.275608	0.155401	112182614	XM_024321118.1 Rosa chinensis psbP-like protein 1, chloroplastic	0.19214	0	0	co_expression
TCONS_00000830	1.14767	0.275608	0.155401	112182658	XM_024321172.1 Rosa chinensis uncharacterized LOC112182658 transcript variant X1,	0.378535	0	0	co_expression
TCONS_00000830	1.14767	0.275608	0.155401	112183394	XM_024321761.1 Rosa chinensis uncharacterized LOC112183394	183.502	2.73277	3.97015	co_expression
TCONS_00000830	1.14767	0.275608	0.155401	112183686	XM_024322042.1 Rosa chinensis GDSL esterase/lipase At3g14820-like	0.391393	0.0637907	0.127057	co_expression
TCONS_00000830	1.14767	0.275608	0.155401	112184650	XM_024322899.1 Rosa chinensis uncharacterized LOC112184650	3.8582	0.916482	0.123512	co_expression
TCONS_00000830	1.14767	0.275608	0.155401	112185605	XM_024323871.1 Rosa chinensis pentatricopeptide repeat-containing protein At1g80880, mitochondrial transcript variant X2,	2.25626	0.919357	0.763186	co_expression
TCONS_00000830	1.14767	0.275608	0.155401	112186383	XM_024324781.1 Rosa chinensis probable caffeoyl-CoA O-methyltransferase At4g26220	25.1141	10.5918	10.3109	co_expression
TCONS_00000830	1.14767	0.275608	0.155401	112187022	XM_024325638.1 Rosa chinensis ATP-dependent zinc metalloprotease FTSH 6, chloroplastic	0.549125	0.00927733	0.03715	co_expression
TCONS_00000830	1.14767	0.275608	0.155401	112187261	XM_024325987.1 Rosa chinensis ADP-ribosylation factor-like protein 8a	35.5455	16.14	9.85377	co_expression
TCONS_00000830	1.14767	0.275608	0.155401	112187887	XM_024326850.1 Rosa chinensis cytochrome P450 90B1	21.3441	4.47386	3.25369	co_expression
TCONS_00000830	1.14767	0.275608	0.155401	112188056	XM_024327075.1 Rosa chinensis E3 ubiquitin-protein ligase RHA2B-like	27.7204	1.7826	1.46153	co_expression
TCONS_00000830	1.14767	0.275608	0.155401	112188894	XM_024328122.1 Rosa chinensis uncharacterized LOC112188894	2.17364	0.432521	0.098723	co_expression
TCONS_00000830	1.14767	0.275608	0.155401	112188954	XM_024328194.1 Rosa chinensis uncharacterized LOC112188954 transcript variant X1,	3.04727	1.89818	1.66565	co_expression
TCONS_00000830	1.14767	0.275608	0.155401	112189692	XM_024329041.1 Rosa chinensis 2-oxoisovalerate dehydrogenase subunit alpha 2, mitochondrial-like transcript variant X1,	53.8347	6.86387	9.59447	co_expression
TCONS_00000830	1.14767	0.275608	0.155401	112189791	XM_024329148.1 Rosa chinensis receptor-like protein EIX2	0.0628983	0.0111033	0.00306233	co_expression
TCONS_00000830	1.14767	0.275608	0.155401	112190032	XM_024329449.1 Rosa chinensis UPF0481 protein At3g47200-like transcript variant X1,	0.296015	0.058553	0.05062	co_expression
TCONS_00000830	1.14767	0.275608	0.155401	112190090	XM_024329517.1 Rosa chinensis WEB family protein At3g51220	0.480018	0	0	co_expression
TCONS_00000830	1.14767	0.275608	0.155401	112191404	XM_024330749.1 Rosa chinensis carotene epsilon-monooxygenase, chloroplastic	6.27084	1.85838	0.562404	co_expression
TCONS_00000830	1.14767	0.275608	0.155401	112192301	XM_024331961.1 Rosa chinensis cinnamoyl-CoA reductase 1-like	0.074465	0	0	co_expression
TCONS_00000830	1.14767	0.275608	0.155401	112192411	XM_024332137.1 Rosa chinensis cysteine synthase-like transcript variant X1,	5.37907	0.649131	0.548715	co_expression
TCONS_00000830	1.14767	0.275608	0.155401	112193036	XM_024333046.1 Rosa chinensis uncharacterized LOC112193036	1.10186	0.15313	0.0146547	co_expression
TCONS_00000830	1.14767	0.275608	0.155401	112193555	XM_024333738.1 Rosa chinensis uncharacterized LOC112193555 transcript variant X1,	24.8592	16.8097	15.9989	co_expression
TCONS_00000830	1.14767	0.275608	0.155401	112193725	XM_024333955.1 Rosa chinensis protein CDI	47.5532	18.7141	17.1875	co_expression
TCONS_00000830	1.14767	0.275608	0.155401	112193959	--	0.170717	0	0.010683	co_expression
TCONS_00000830	1.14767	0.275608	0.155401	112194041	XM_024334303.1 Rosa chinensis probable WRKY transcription factor 70	1.4807	0.017829	0.0178697	co_expression
TCONS_00000830	1.14767	0.275608	0.155401	112196305	XM_024336625.1 Rosa chinensis defensin Ec-AMP-D2-like	29.0955	2.58192	0.212907	co_expression
TCONS_00000830	1.14767	0.275608	0.155401	112196332	XM_024336649.1 Rosa chinensis protein ECERIFERUM 26-like	25.4335	7.42681	5.57969	co_expression
TCONS_00000830	1.14767	0.275608	0.155401	112196361	XM_024336682.1 Rosa chinensis putative disease resistance protein RGA4	7.23036	1.22273	0.393685	co_expression
TCONS_00000830	1.14767	0.275608	0.155401	112196810	XM_024337268.1 Rosa chinensis retinoblastoma-related protein	20.6795	9.27589	7.65074	co_expression
TCONS_00000830	1.14767	0.275608	0.155401	112197212	XM_024337814.1 Rosa chinensis protein YIF1B-B transcript variant X1,	54.7658	39.6114	36.0499	co_expression
TCONS_00000830	1.14767	0.275608	0.155401	112197254	XM_024337874.1 Rosa chinensis TMV resistance protein N-like	0.083345	0	0	co_expression
TCONS_00000830	1.14767	0.275608	0.155401	112197502	XM_024338215.1 Rosa chinensis protein PTST homolog 2, chloroplastic transcript variant X1,	6.11631	3.46654	2.51624	co_expression
TCONS_00000830	1.14767	0.275608	0.155401	112198237	XM_024339321.1 Rosa chinensis septin and tuftelin-interacting protein 1 homolog 1-like	7.31527	3.83316	2.843	co_expression
TCONS_00000830	1.14767	0.275608	0.155401	112199036	XM_024340102.1 Rosa chinensis probable metal-nicotianamine transporter YSL6	2.61774	1.47716	1.44068	co_expression
TCONS_00000830	1.14767	0.275608	0.155401	112199266	XM_024340306.1 Rosa chinensis septin and tuftelin-interacting protein 1 homolog 1-like	5.52479	2.08247	2.09686	co_expression
TCONS_00000830	1.14767	0.275608	0.155401	112199556	--	0.809377	0.163229	0.191388	co_expression
TCONS_00000830	1.14767	0.275608	0.155401	112199906	XM_024340893.1 Rosa chinensis ribonuclease 3	1.39786	0.163338	0.0308767	co_expression
TCONS_00000830	1.14767	0.275608	0.155401	112200410	--	5.07182	2.23639	1.50477	co_expression
TCONS_00000830	1.14767	0.275608	0.155401	112200794	XM_024341806.1 Rosa chinensis anaphase-promoting complex subunit 13-like transcript variant X1,	1.61399	0	0.0570573	co_expression
TCONS_00000830	1.14767	0.275608	0.155401	112201667	XM_024342578.1 Rosa chinensis zinc finger protein CONSTANS	0.225369	0	0	co_expression
TCONS_00000830	1.14767	0.275608	0.155401	112202214	XM_024343154.1 Rosa chinensis uncharacterized LOC112202214 transcript variant X1,	3.33097	0.47002	0.351102	co_expression
TCONS_00000830	1.14767	0.275608	0.155401	112202319	XM_024343272.1 Rosa chinensis inactive beta-amylase 4, chloroplastic transcript variant X1,	0.673755	0.0798677	0.0331983	co_expression
TCONS_00000830	1.14767	0.275608	0.155401	112202358	--	0.294192	0	0	co_expression
TCONS_00000830	1.14767	0.275608	0.155401	112203282	XM_024344272.1 Rosa chinensis uncharacterized LOC112203282	1.11179	0.120559	0.0702733	co_expression
TCONS_00000830	1.14767	0.275608	0.155401	112203937	XM_024344834.1 Rosa chinensis NAC domain-containing protein 101-like	1.36584	0.503104	0.235458	co_expression
TCONS_00000830	1.14767	0.275608	0.155401	XLOC_043076	--	5.58591	2.53595	2.74009	co_expression
TCONS_00001063	0	0.660618	6.78344	112163695	XM_024299975.1 Rosa chinensis formin-A-like	0.173084	4.68436	120.609	co_expression
TCONS_00001063	0	0.660618	6.78344	112164254	XM_024300477.1 Rosa chinensis uncharacterized LOC112164254	0	0.088571	1.11085	co_expression
TCONS_00001063	0	0.660618	6.78344	112164422	XM_024300615.1 Rosa chinensis receptor-like protein 2	0	0.00408733	0.043678	co_expression
TCONS_00001063	0	0.660618	6.78344	112164460	XM_024300650.1 Rosa chinensis uncharacterized LOC112164460 transcript variant X1,	13.1045	13.8865	20.4827	co_expression
TCONS_00001063	0	0.660618	6.78344	112164601	XM_024300853.1 Rosa chinensis non-specific lipid-transfer protein 1-like	0.154626	0.881654	6.91306	co_expression
TCONS_00001063	0	0.660618	6.78344	112164606	XM_024300857.1 Rosa chinensis BAG-associated GRAM protein 1 transcript variant X1,	12.1874	12.3865	17.7158	co_expression
TCONS_00001063	0	0.660618	6.78344	112164697	XM_024300989.1 Rosa chinensis G-type lectin S-receptor-like serine/threonine-protein kinase SD1-1 transcript variant X1,	0.56152	2.30031	6.66181	co_expression
TCONS_00001063	0	0.660618	6.78344	112164824	XM_024301151.1 Rosa chinensis cysteine-rich receptor-like protein kinase 29	0	0	0.255132	co_expression
TCONS_00001063	0	0.660618	6.78344	112165714	XM_024302332.1 Rosa chinensis protein TRM32 transcript variant X1,	0.072499	1.21784	4.74846	co_expression
TCONS_00001063	0	0.660618	6.78344	112165786	XM_024302433.1 Rosa chinensis uncharacterized LOC112165786	0.017317	0.952997	11.733	co_expression
TCONS_00001063	0	0.660618	6.78344	112165897	XM_024302600.1 Rosa chinensis rust resistance kinase Lr10-like	0.0476593	1.84381	7.32828	co_expression
TCONS_00001063	0	0.660618	6.78344	112166104	XM_024302872.1 Rosa chinensis uncharacterized LOC112166104	0.0183337	0.0801697	0.528851	co_expression
TCONS_00001063	0	0.660618	6.78344	112166295	XM_024303095.1 Rosa chinensis probable LRR receptor-like serine/threonine-protein kinase At3g47570	0.226253	0.344295	24.703	co_expression
TCONS_00001063	0	0.660618	6.78344	112166383	XM_024303226.1 Rosa chinensis cytochrome c6, chloroplastic	0.205433	0.302523	1.10005	co_expression
TCONS_00001063	0	0.660618	6.78344	112166914	XM_024303855.1 Rosa chinensis peroxidase N	0	0.063542	0.824078	co_expression
TCONS_00001063	0	0.660618	6.78344	112166929	XM_024303866.1 Rosa chinensis probable carboxylesterase 18	0	0.0131483	0.421499	co_expression
TCONS_00001063	0	0.660618	6.78344	112167890	XM_024304988.1 Rosa chinensis rust resistance kinase Lr10-like	0	0.0176457	0.324798	co_expression
TCONS_00001063	0	0.660618	6.78344	112168016	XM_024305129.1 Rosa chinensis kinetochore protein ndc80	0.754993	0.931968	1.80501	co_expression
TCONS_00001063	0	0.660618	6.78344	112169182	XM_024306165.1 Rosa chinensis UPF0496 protein At1g20180-like	0.0644677	2.70062	17.1714	co_expression
TCONS_00001063	0	0.660618	6.78344	112169321	XM_024306339.1 Rosa chinensis uncharacterized LOC112169321	0	0.0143787	0.550892	co_expression
TCONS_00001063	0	0.660618	6.78344	112169499	XM_024306534.1 Rosa chinensis plant intracellular Ras-group-related LRR protein 9-like	6.52735	17.8389	34.9615	co_expression
TCONS_00001063	0	0.660618	6.78344	112169792	XM_024306855.1 Rosa chinensis uncharacterized LOC112169792 transcript variant X1,	0.150598	0.292499	0.613942	co_expression
TCONS_00001063	0	0.660618	6.78344	112169831	XM_024306887.1 Rosa chinensis homeobox-leucine zipper protein ATHB-8-like transcript variant X1,	2.07314	4.21803	8.82452	co_expression
TCONS_00001063	0	0.660618	6.78344	112169956	XM_024307077.1 Rosa chinensis sarcoplasmic reticulum histidine-rich calcium-binding protein transcript variant X1,	6.66111	9.23056	17.1674	co_expression
TCONS_00001063	0	0.660618	6.78344	112171236	XM_024308448.1 Rosa chinensis uncharacterized LOC112171236	0	0	0.120533	co_expression
TCONS_00001063	0	0.660618	6.78344	112171528	XM_024308699.1 Rosa chinensis 12S seed storage protein CRA1-like	0.042258	0.205252	43.4311	co_expression
TCONS_00001063	0	0.660618	6.78344	112171874	XM_024309001.1 Rosa chinensis uncharacterized LOC112171874	0.312318	13.5484	155.548	co_expression
TCONS_00001063	0	0.660618	6.78344	112171937	XM_024309055.1 Rosa chinensis uncharacterized LOC112171937 transcript variant X1,	0.378014	0.361221	2.19487	co_expression
TCONS_00001063	0	0.660618	6.78344	112172449	XM_024309796.1 Rosa chinensis protein EXORDIUM-like 2	15.448	209.914	1107.25	co_expression
TCONS_00001063	0	0.660618	6.78344	112172499	XM_024309866.1 Rosa chinensis endochitinase EP3-like	0.33632	8.61945	126.268	co_expression
TCONS_00001063	0	0.660618	6.78344	112172651	XM_024310077.1 Rosa chinensis uncharacterized LOC112172651 transcript variant X1,	1.50775	1.67752	4.43467	co_expression
TCONS_00001063	0	0.660618	6.78344	112172844	XM_024310340.1 Rosa chinensis organ-specific protein P4	1.99103	3.62314	15.0935	co_expression
TCONS_00001063	0	0.660618	6.78344	112173255	XM_024310847.1 Rosa chinensis protein SRG1-like	1.68018	3.0004	10.4346	co_expression
TCONS_00001063	0	0.660618	6.78344	112174598	XM_024312397.1 Rosa chinensis uncharacterized LOC112174598	0.215423	1.02211	3.82975	co_expression
TCONS_00001063	0	0.660618	6.78344	112174770	XM_024312581.1 Rosa chinensis aquaporin PIP-type-like	0	0.0159803	6.3863	co_expression
TCONS_00001063	0	0.660618	6.78344	112175649	XM_024313359.1 Rosa chinensis cytochrome P450 71A1-like	0.260033	0.538169	3.95609	co_expression
TCONS_00001063	0	0.660618	6.78344	112175773	XM_024313518.1 Rosa chinensis MORN repeat-containing protein 1-like	7.07461	7.28447	17.6529	co_expression
TCONS_00001063	0	0.660618	6.78344	112176159	XM_024313983.1 Rosa chinensis cytochrome P450 71A3-like	0	1.81307	10.1892	co_expression
TCONS_00001063	0	0.660618	6.78344	112176182	XM_024313998.1 Rosa chinensis protein NBR1 homolog	202.18	217.708	360.008	co_expression
TCONS_00001063	0	0.660618	6.78344	112176261	--	0	0.077309	0.90277	co_expression
TCONS_00001063	0	0.660618	6.78344	112176429	--	0	0.552369	4.06665	co_expression
TCONS_00001063	0	0.660618	6.78344	112176717	XM_024314775.1 Rosa chinensis uncharacterized LOC112176717	0.679436	0.897503	3.15436	co_expression
TCONS_00001063	0	0.660618	6.78344	112176800	XM_024314887.1 Rosa chinensis pentatricopeptide repeat-containing protein At1g71490 transcript variant X1,	0.178982	0.205709	0.794372	co_expression
TCONS_00001063	0	0.660618	6.78344	112177154	XM_024315374.1 Rosa chinensis ribosomal RNA small subunit methyltransferase	2.65463	2.04327	8.28412	co_expression
TCONS_00001063	0	0.660618	6.78344	112177270	XM_024315574.1 Rosa chinensis geraniol 8-hydroxylase-like	0.748376	6.11818	185.253	co_expression
TCONS_00001063	0	0.660618	6.78344	112177287	XM_024315588.1 Rosa chinensis uncharacterized LOC112177287	0.342177	0.240555	2.11027	co_expression
TCONS_00001063	0	0.660618	6.78344	112177485	XM_024315775.1 Rosa chinensis uncharacterized mitochondrial protein AtMg00810-like	0	0.0476837	0.745111	co_expression
TCONS_00001063	0	0.660618	6.78344	112178337	XM_024316493.1 Rosa chinensis uncharacterized LOC112178337	0	0	0.963303	co_expression
TCONS_00001063	0	0.660618	6.78344	112178435	XM_024316582.1 Rosa chinensis transcription factor bHLH133-like transcript variant X1,	0.493759	1.35244	4.0647	co_expression
TCONS_00001063	0	0.660618	6.78344	112178846	XM_024317091.1 Rosa chinensis uncharacterized LOC112178846	0.142907	0.164717	4.33558	co_expression
TCONS_00001063	0	0.660618	6.78344	112179075	XM_024317390.1 Rosa chinensis myb-like protein L	1.09894	2.16319	4.72154	co_expression
TCONS_00001063	0	0.660618	6.78344	112179143	XM_024317478.1 Rosa chinensis uncharacterized LOC112179143	10.8426	14.9409	59.7737	co_expression
TCONS_00001063	0	0.660618	6.78344	112179311	XM_024317698.1 Rosa chinensis probable trehalose-phosphate phosphatase D	0.341542	3.82992	37.3306	co_expression
TCONS_00001063	0	0.660618	6.78344	112180150	XM_024318653.1 Rosa chinensis protein spotted leaf 11	11.9498	15.2791	35.3009	co_expression
TCONS_00001063	0	0.660618	6.78344	112180161	XM_024318667.1 Rosa chinensis mannose-6-phosphate isomerase 1-like	7.06325	7.95539	37.3952	co_expression
TCONS_00001063	0	0.660618	6.78344	112180252	XM_024318769.1 Rosa chinensis protein PIN-LIKES 3-like	17.1683	24.7814	99.9073	co_expression
TCONS_00001063	0	0.660618	6.78344	112180450	XM_024319016.1 Rosa chinensis disease resistance protein RPM1-like	0.104663	0.41493	1.64408	co_expression
TCONS_00001063	0	0.660618	6.78344	112181292	--	0	0	0.0623413	co_expression
TCONS_00001063	0	0.660618	6.78344	112181741	XM_024320126.1 Rosa chinensis probable polygalacturonase	0.783903	2.0947	139.708	co_expression
TCONS_00001063	0	0.660618	6.78344	112181995	XM_024320419.1 Rosa chinensis probable E3 ubiquitin-protein ligase RHB1A transcript variant X1,	1.59483	3.20422	16.2081	co_expression
TCONS_00001063	0	0.660618	6.78344	112182365	XM_024320848.1 Rosa chinensis probable acetyltransferase NATA1-like	5.8491	5.05915	22.9079	co_expression
TCONS_00001063	0	0.660618	6.78344	112182660	XM_024321177.1 Rosa chinensis 40S ribosomal protein S28-like transcript variant X1,	0	0	0.501511	co_expression
TCONS_00001063	0	0.660618	6.78344	112182811	XM_024321359.1 Rosa chinensis phenolic glucoside malonyltransferase 2-like	0	0	0.136936	co_expression
TCONS_00001063	0	0.660618	6.78344	112183557	--	0	0.0529147	1.22371	co_expression
TCONS_00001063	0	0.660618	6.78344	112183877	XM_024322192.1 Rosa chinensis uncharacterized LOC112183877	4.45394	11.6725	40.0912	co_expression
TCONS_00001063	0	0.660618	6.78344	112183928	XM_024322242.1 Rosa chinensis uncharacterized PE-PGRS family protein PE_PGRS20-like	0	0.0372653	0.184025	co_expression
TCONS_00001063	0	0.660618	6.78344	112184251	XM_024322518.1 Rosa chinensis uncharacterized LOC112184251	0	0	0.0452553	co_expression
TCONS_00001063	0	0.660618	6.78344	112184713	XM_024322951.1 Rosa chinensis probable glutathione S-transferase	0.319033	1.19018	7.38059	co_expression
TCONS_00001063	0	0.660618	6.78344	112184829	XM_024323066.1 Rosa chinensis L-type lectin-domain containing receptor kinase VIII.1-like	0.473616	0.892311	6.88104	co_expression
TCONS_00001063	0	0.660618	6.78344	112184958	XM_024323180.1 Rosa chinensis protein FAR1-RELATED SEQUENCE 5-like	0	0.0281753	0.148236	co_expression
TCONS_00001063	0	0.660618	6.78344	112185223	XM_024323426.1 Rosa chinensis uncharacterized LOC112185223	5.79672	7.57324	36.6103	co_expression
TCONS_00001063	0	0.660618	6.78344	112185394	XM_024323637.1 Rosa chinensis ER lumen protein-retaining receptor-like	11.1189	16.1412	49.402	co_expression
TCONS_00001063	0	0.660618	6.78344	112185407	XM_024323654.1 Rosa chinensis laccase-15-like	0.609156	29.5432	416.125	co_expression
TCONS_00001063	0	0.660618	6.78344	112185595	XM_024323857.1 Rosa chinensis respiratory burst oxidase homolog protein E	0	0.039746	0.409284	co_expression
TCONS_00001063	0	0.660618	6.78344	112185713	XM_024324046.1 Rosa chinensis expansin-A8	7.03616	13.1554	67.2694	co_expression
TCONS_00001063	0	0.660618	6.78344	112185853	XM_024324178.1 Rosa chinensis WAT1-related protein At3g28050-like	1.89332	6.84551	39.9401	co_expression
TCONS_00001063	0	0.660618	6.78344	112185936	XM_024324265.1 Rosa chinensis lachrymatory-factor synthase-like	0.929213	5.22844	20.9421	co_expression
TCONS_00001063	0	0.660618	6.78344	112186066	XM_024324412.1 Rosa chinensis CASP-like protein 4A1	0.570393	1.24327	5.16015	co_expression
TCONS_00001063	0	0.660618	6.78344	112186203	XM_024324560.1 Rosa chinensis uncharacterized LOC112186203	0	0.095113	0.534233	co_expression
TCONS_00001063	0	0.660618	6.78344	112186305	XM_024324664.1 Rosa chinensis ribonucleoside-diphosphate reductase small chain	0.959816	1.87566	6.3498	co_expression
TCONS_00001063	0	0.660618	6.78344	112187089	XM_024325735.1 Rosa chinensis chloride channel protein CLC-b	0.342121	0.063921	5.82165	co_expression
TCONS_00001063	0	0.660618	6.78344	112187549	XM_024326396.1 Rosa chinensis class V chitinase-like	0.0270643	2.49625	11.5955	co_expression
TCONS_00001063	0	0.660618	6.78344	112187659	XM_024326541.1 Rosa chinensis B-box zinc finger protein 32-like	0.0350837	0.202151	5.86597	co_expression
TCONS_00001063	0	0.660618	6.78344	112187900	XM_024326865.1 Rosa chinensis subtilisin-like protease SBT5.3	0.027918	0.405087	5.05662	co_expression
TCONS_00001063	0	0.660618	6.78344	112188008	XM_024327002.1 Rosa chinensis pentatricopeptide repeat-containing protein At4g36680, mitochondrial	1.3726	1.66443	3.76641	co_expression
TCONS_00001063	0	0.660618	6.78344	112188121	XM_024327169.1 Rosa chinensis protein trichome birefringence-like 39	29.775	95.5951	349.53	co_expression
TCONS_00001063	0	0.660618	6.78344	112188273	XM_024327363.1 Rosa chinensis lachrymatory-factor synthase-like	0.905442	4.59207	17.7611	co_expression
TCONS_00001063	0	0.660618	6.78344	112188580	XM_024327723.1 Rosa chinensis phenolic glucoside malonyltransferase 2-like	0.0345267	0.593973	5.44712	co_expression
TCONS_00001063	0	0.660618	6.78344	112188596	XM_024327743.1 Rosa chinensis phosphatidylinositol/phosphatidylcholine transfer protein SFH12-like transcript variant X1,	0.00407333	0.418464	2.95799	co_expression
TCONS_00001063	0	0.660618	6.78344	112188612	XM_024327764.1 Rosa chinensis peroxidase P7-like	0.0265457	0.803882	11.5057	co_expression
TCONS_00001063	0	0.660618	6.78344	112188773	XM_024327981.1 Rosa chinensis actin-related protein 6 transcript variant X1,	2.07841	2.2398	4.58265	co_expression
TCONS_00001063	0	0.660618	6.78344	112189173	XM_024328442.1 Rosa chinensis putative oxidoreductase TDA3	4.46504	4.33061	9.70702	co_expression
TCONS_00001063	0	0.660618	6.78344	112189396	XM_024328727.1 Rosa chinensis glycerol-3-phosphate acyltransferase 1 transcript variant X1,	0.175821	5.81169	63.3938	co_expression
TCONS_00001063	0	0.660618	6.78344	112189991	XM_024329404.1 Rosa chinensis FRIGIDA-like protein 4a	0	0.005443	0.0322203	co_expression
TCONS_00001063	0	0.660618	6.78344	112190089	XM_024329516.1 Rosa chinensis uncharacterized LOC112190089	0.0136117	0.0658803	1.42751	co_expression
TCONS_00001063	0	0.660618	6.78344	112191391	XM_024330735.1 Rosa chinensis serine carboxypeptidase-like 20 transcript variant X1,	2.31997	1.83082	8.38562	co_expression
TCONS_00001063	0	0.660618	6.78344	112191489	XM_024330839.1 Rosa chinensis agamous-like MADS-box protein AGL15 transcript variant X1,	2.3533	2.68777	9.76735	co_expression
TCONS_00001063	0	0.660618	6.78344	112191657	XM_024331049.1 Rosa chinensis putative receptor protein kinase ZmPK1	0.116955	0.28423	0.9213	co_expression
TCONS_00001063	0	0.660618	6.78344	112191709	--	0.255547	0.301622	0.829519	co_expression
TCONS_00001063	0	0.660618	6.78344	112191898	XM_024331380.1 Rosa chinensis serine/threonine-protein kinase CTR1 transcript variant X2,	13.8892	16.2876	27.3339	co_expression
TCONS_00001063	0	0.660618	6.78344	112192281	XM_024331938.1 Rosa chinensis exportin-7 transcript variant X1,	16.4659	17.1942	19.9326	co_expression
TCONS_00001063	0	0.660618	6.78344	112192285	XM_024331939.1 Rosa chinensis putative receptor-like protein kinase At4g00960 transcript variant X1,	1.82969	1.98838	3.72944	co_expression
TCONS_00001063	0	0.660618	6.78344	112192323	XM_024331985.1 Rosa chinensis aldehyde dehydrogenase family 2 member C4-like transcript variant X1,	0	0.067366	0.989192	co_expression
TCONS_00001063	0	0.660618	6.78344	112192552	XM_024332342.1 Rosa chinensis aspartic proteinase-like transcript variant X1,	1.58742	6.47081	54.6029	co_expression
TCONS_00001063	0	0.660618	6.78344	112192761	XM_024332628.1 Rosa chinensis uncharacterized LOC112192761	2.27303	2.87652	8.3267	co_expression
TCONS_00001063	0	0.660618	6.78344	112192878	XM_024332787.1 Rosa chinensis transcription factor UNE12-like transcript variant X1,	3.01571	1.35073	12.8607	co_expression
TCONS_00001063	0	0.660618	6.78344	112193050	XM_024333064.1 Rosa chinensis probable WRKY transcription factor 74	0.101923	0.618471	2.53303	co_expression
TCONS_00001063	0	0.660618	6.78344	112193441	XM_024333588.1 Rosa chinensis protein RADIALIS-like 3	0.612579	1.87125	5.79172	co_expression
TCONS_00001063	0	0.660618	6.78344	112193658	XM_024333883.1 Rosa chinensis uncharacterized LOC112193658	0.307244	0.195796	0.790401	co_expression
TCONS_00001063	0	0.660618	6.78344	112194013	--	0.172311	0.256779	0.682604	co_expression
TCONS_00001063	0	0.660618	6.78344	112194600	--	0.206096	1.85577	16.3416	co_expression
TCONS_00001063	0	0.660618	6.78344	112194729	XM_024334949.1 Rosa chinensis exocyst complex component EXO70H1-like	0.046081	0.204439	6.22762	co_expression
TCONS_00001063	0	0.660618	6.78344	112194826	--	0.33901	0.335773	0.87005	co_expression
TCONS_00001063	0	0.660618	6.78344	112194868	XM_024335113.1 Rosa chinensis uncharacterized LOC112194868	0.307423	0.542603	1.45584	co_expression
TCONS_00001063	0	0.660618	6.78344	112195331	XM_024335747.1 Rosa chinensis DNA-directed RNA polymerase III subunit 1-like	0.155435	0.199854	0.875864	co_expression
TCONS_00001063	0	0.660618	6.78344	112196073	XM_024336361.1 Rosa chinensis high mobility group B protein 15 transcript variant X1,	0	0.0359267	0.356579	co_expression
TCONS_00001063	0	0.660618	6.78344	112196951	XM_024337452.1 Rosa chinensis putative beta-D-xylosidase	10.3274	493.123	3829.23	co_expression
TCONS_00001063	0	0.660618	6.78344	112196972	XM_024337476.1 Rosa chinensis endochitinase EP3-like	2.32342	79.7464	384.526	co_expression
TCONS_00001063	0	0.660618	6.78344	112196973	XM_024337477.1 Rosa chinensis endochitinase EP3-like	0.817167	43.7448	413.757	co_expression
TCONS_00001063	0	0.660618	6.78344	112197127	XM_024337700.1 Rosa chinensis transcription factor TGA2.2-like	0.0103167	0.301657	1.78792	co_expression
TCONS_00001063	0	0.660618	6.78344	112197337	XM_024337956.1 Rosa chinensis uncharacterized LOC112197337	2.78129	2.91933	6.1257	co_expression
TCONS_00001063	0	0.660618	6.78344	112197448	XM_024338123.1 Rosa chinensis uncharacterized LOC112197448	0	0	0.612867	co_expression
TCONS_00001063	0	0.660618	6.78344	112197658	--	0.129935	2.03015	14.8391	co_expression
TCONS_00001063	0	0.660618	6.78344	112198017	XM_024339023.1 Rosa chinensis protein XRI1	0.298533	0.964021	7.50945	co_expression
TCONS_00001063	0	0.660618	6.78344	112198153	XM_024339220.1 Rosa chinensis homeobox-leucine zipper protein HOX3	0	0	0.357659	co_expression
TCONS_00001063	0	0.660618	6.78344	112198176	XM_024339246.1 Rosa chinensis primary amine oxidase-like	0.0279117	4.24631	24.8593	co_expression
TCONS_00001063	0	0.660618	6.78344	112198353	XM_024339459.1 Rosa chinensis snakin-2-like	0	0.100243	1.10049	co_expression
TCONS_00001063	0	0.660618	6.78344	112198363	XM_024339472.1 Rosa chinensis GATA transcription factor 15-like	1.94289	2.65031	8.22049	co_expression
TCONS_00001063	0	0.660618	6.78344	112198403	XM_024339519.1 Rosa chinensis uncharacterized LOC112198403	0.412582	0.627875	2.02886	co_expression
TCONS_00001063	0	0.660618	6.78344	112198645	XM_024339783.1 Rosa chinensis uncharacterized LOC112198645	0.42195	0.908797	3.35349	co_expression
TCONS_00001063	0	0.660618	6.78344	112198718	--	0.0456637	0.205951	0.843339	co_expression
TCONS_00001063	0	0.660618	6.78344	112199182	XM_024340231.1 Rosa chinensis uncharacterized LOC112199182	0	0	0.677998	co_expression
TCONS_00001063	0	0.660618	6.78344	112199188	XM_024340238.1 Rosa chinensis protein ALP1-like	0.00797467	0.0648467	0.775805	co_expression
TCONS_00001063	0	0.660618	6.78344	112199344	XM_024340373.1 Rosa chinensis probable FBD-associated F-box protein At1g32375	0	0	0.542867	co_expression
TCONS_00001063	0	0.660618	6.78344	112200007	XM_024341002.1 Rosa chinensis uncharacterized LOC112200007	1.23411	3.77592	16.735	co_expression
TCONS_00001063	0	0.660618	6.78344	112200303	--	0.522497	0.748822	6.93985	co_expression
TCONS_00001063	0	0.660618	6.78344	112200637	XM_024341658.1 Rosa chinensis putative clathrin assembly protein At5g57200	0.174854	0.63406	11.1388	co_expression
TCONS_00001063	0	0.660618	6.78344	112200668	--	0.199326	0.123226	4.62073	co_expression
TCONS_00001063	0	0.660618	6.78344	112201502	XM_024342385.1 Rosa chinensis ABSCISIC ACID-INSENSITIVE 5-like protein 1 transcript variant X1,	0.0540077	0.035863	0.731485	co_expression
TCONS_00001063	0	0.660618	6.78344	112202634	XM_024343632.1 Rosa chinensis restin homolog	12.5324	13.0464	17.9033	co_expression
TCONS_00001063	0	0.660618	6.78344	112203017	XM_024344046.1 Rosa chinensis ananain-like	0	0	0.424794	co_expression
TCONS_00001063	0	0.660618	6.78344	112203261	XM_024344251.1 Rosa chinensis receptor-like protein EIX2	0.0101277	0.0537513	0.424948	co_expression
TCONS_00001063	0	0.660618	6.78344	112203590	XM_024344533.1 Rosa chinensis uncharacterized LOC112203590	0.615254	0.561743	2.73242	co_expression
TCONS_00001063	0	0.660618	6.78344	112203921	XM_024344819.1 Rosa chinensis rust resistance kinase Lr10-like	0	0	0.212895	co_expression
TCONS_00001063	0	0.660618	6.78344	XLOC_050865	--	0	0.0534337	0.492009	co_expression
TCONS_00001523	8.60324	57.3191	85.2922	112166339	XM_024303163.1 Rosa chinensis protein IQ-DOMAIN 1 transcript variant X1,	6.43164	5.0648	3.66715	co_expression
TCONS_00001523	8.60324	57.3191	85.2922	112169061	XM_024306003.1 Rosa chinensis uncharacterized LOC112169061 transcript variant X1,	2.58999	5.92317	6.66484	co_expression
TCONS_00001523	8.60324	57.3191	85.2922	112176543	XM_024314519.1 Rosa chinensis probable eukaryotic translation initiation factor 5-1	134.906	192.437	234.326	co_expression
TCONS_00001523	8.60324	57.3191	85.2922	112182805	XM_024321353.1 Rosa chinensis (-)-germacrene D synthase-like	0	0	0	co_location
TCONS_00001523	8.60324	57.3191	85.2922	112182991	--	0.0650053	0.11447	0.0768773	co_location
TCONS_00001523	8.60324	57.3191	85.2922	112182993	XM_024321586.1 Rosa chinensis sm-like protein LSM8 transcript variant X1,	14.024	4.14441	10.0102	co_location
TCONS_00001523	8.60324	57.3191	85.2922	112188265	XM_024327353.1 Rosa chinensis probable disease resistance protein At5g66900 transcript variant X1,	0	0	0	co_location
TCONS_00001523	8.60324	57.3191	85.2922	112188280	XM_024327374.1 Rosa chinensis probable disease resistance protein At5g66900	0	0	0	co_location
TCONS_00001523	8.60324	57.3191	85.2922	112188286	XM_024327386.1 Rosa chinensis probable protein arginine N-methyltransferase 3	0.397361	0.161043	0.795938	co_location
TCONS_00001523	8.60324	57.3191	85.2922	112188296	XM_024327398.1 Rosa chinensis uncharacterized LOC112188296 transcript variant X1,	0.000661	0	0	co_location
TCONS_00001523	8.60324	57.3191	85.2922	112188730	--	0.304501	0.576719	1.44247	co_location
TCONS_00001523	8.60324	57.3191	85.2922	112188740	XM_024327921.1 Rosa chinensis G-type lectin S-receptor-like serine/threonine-protein kinase B120 transcript variant X1,	1.11653	1.03209	1.62583	co_location
TCONS_00001523	8.60324	57.3191	85.2922	112188747	--	0.929128	1.98931	4.44161	co_location
TCONS_00001523	8.60324	57.3191	85.2922	112188755	XM_024327958.1 Rosa chinensis pentatricopeptide repeat-containing protein At2g17525, mitochondrial-like transcript variant X1,	2.77449	1.48146	1.74401	co_location
TCONS_00001523	8.60324	57.3191	85.2922	112188785	XM_024327998.1 Rosa chinensis ERI1 exoribonuclease 2-like	97.0287	98.273	92.1327	co_location
TCONS_00001523	8.60324	57.3191	85.2922	112188797	XM_024328008.1 Rosa chinensis pentatricopeptide repeat-containing protein At2g17525, mitochondrial-like	1.59402	1.31262	1.24241	co_location
TCONS_00001523	8.60324	57.3191	85.2922	112189256	XM_024328552.1 Rosa chinensis serine/threonine-protein kinase VPS15	23.8314	29.5622	33.7439	co_expression
TCONS_00001523	8.60324	57.3191	85.2922	112195491	XM_024335900.1 Rosa chinensis uncharacterized LOC112195491	31.6856	11.3044	14.0132	co_location
TCONS_00001523	8.60324	57.3191	85.2922	112196688	XM_024337105.1 Rosa chinensis shewanella-like protein phosphatase 2	4.11278	5.93863	6.7489	co_expression
TCONS_00001523	8.60324	57.3191	85.2922	112196810	XM_024337268.1 Rosa chinensis retinoblastoma-related protein	20.6795	9.27589	7.65074	co_location
TCONS_00001523	8.60324	57.3191	85.2922	112201967	XM_024342896.1 Rosa chinensis uncharacterized LOC112201967	0	0	0	co_location
TCONS_00001523	8.60324	57.3191	85.2922	112201971	XM_024342899.1 Rosa chinensis uncharacterized LOC112201971	0.906441	0.73042	0.416008	co_location
TCONS_00001523	8.60324	57.3191	85.2922	112201988	XM_024342914.1 Rosa chinensis uncharacterized LOC112201988	0	0	0	co_location
TCONS_00001523	8.60324	57.3191	85.2922	112201998	--	9.18254	57.7444	86.3991	co_expression
TCONS_00001523	8.60324	57.3191	85.2922	112201998	--	9.18254	57.7444	86.3991	co_location
TCONS_00001523	8.60324	57.3191	85.2922	112202017	XM_024342926.1 Rosa chinensis pentatricopeptide repeat-containing protein At2g17525, mitochondrial-like	0.469038	0	0	co_location
TCONS_00001943	0	0.440452	0.703038	112163781	XM_024300042.1 Rosa chinensis protein NUCLEAR FUSION DEFECTIVE 4-like	0	0.0121607	0.0187623	co_expression
TCONS_00001943	0	0.440452	0.703038	112167656	XM_024304706.1 Rosa chinensis dehydrodolichyl diphosphate synthase 2-like	0	0.0405943	0.0886417	co_expression
TCONS_00001943	0	0.440452	0.703038	112171728	XM_024308867.1 Rosa chinensis zinc-finger homeodomain protein 5-like partial	0	0.015738	0.0164063	co_expression
TCONS_00001943	0	0.440452	0.703038	112174296	XM_024312039.1 Rosa chinensis putative UPF0481 protein At3g02645	0	0.023685	0.02465	co_expression
TCONS_00001943	0	0.440452	0.703038	112174578	XM_024312377.1 Rosa chinensis bidirectional sugar transporter NEC1-like	0.084663	0.196804	0.366804	co_expression
TCONS_00001943	0	0.440452	0.703038	112175149	XM_024312812.1 Rosa chinensis protein EXORDIUM-like 1	0.122407	0.370639	0.573106	co_expression
TCONS_00001943	0	0.440452	0.703038	112178284	XM_024316447.1 Rosa chinensis toll/interleukin-1 receptor-like protein	0	0.0333777	0.0430027	co_expression
TCONS_00001943	0	0.440452	0.703038	112179557	XM_024318015.1 Rosa chinensis uncharacterized LOC112179557	0.0840767	0.413418	0.805812	co_expression
TCONS_00001943	0	0.440452	0.703038	112180463	XM_024319028.1 Rosa chinensis cyclin-dependent kinase G-2-like	0.00761367	0.0503357	0.0591213	co_expression
TCONS_00001943	0	0.440452	0.703038	112182070	XM_024320500.1 Rosa chinensis ethylene-responsive transcription factor CRF5-like	0.0704363	0.128086	0.281708	co_expression
TCONS_00001943	0	0.440452	0.703038	112184481	XM_024322742.1 Rosa chinensis putative UPF0481 protein At3g02645	0.19932	1.07628	1.79453	co_expression
TCONS_00001943	0	0.440452	0.703038	112184991	XM_024323209.1 Rosa chinensis protein MICRORCHIDIA 7-like	0	0.0165893	0.019247	co_expression
TCONS_00001943	0	0.440452	0.703038	112185854	XM_024324179.1 Rosa chinensis uncharacterized LOC112185854	0	0.002503	0.004662	co_expression
TCONS_00001943	0	0.440452	0.703038	112187209	XM_024325904.1 Rosa chinensis AAA-ATPase At2g18193-like	0	0.00799233	0.0124557	co_expression
TCONS_00001943	0	0.440452	0.703038	112188403	XM_024327511.1 Rosa chinensis titin homolog transcript variant X1,	0	0.00767333	0.0161083	co_expression
TCONS_00001943	0	0.440452	0.703038	112188418	XM_024327532.1 Rosa chinensis calcium-binding protein PBP1-like	10.7697	31.246	58.6078	co_expression
TCONS_00001943	0	0.440452	0.703038	112189232	XM_024328529.1 Rosa chinensis SUPPRESSOR OF GAMMA RESPONSE 1 transcript variant X1,	0.0803523	0.542131	0.709578	co_expression
TCONS_00001943	0	0.440452	0.703038	112189341	XM_024328652.1 Rosa chinensis G-type lectin S-receptor-like serine/threonine-protein kinase At1g61500	0.654324	1.19303	1.57666	co_expression
TCONS_00001943	0	0.440452	0.703038	112192721	XM_024332581.1 Rosa chinensis probable aldo-keto reductase 1	0	0.0168517	0.0199873	co_expression
TCONS_00001943	0	0.440452	0.703038	112196531	--	0	0.002552	0.005099	co_expression
TCONS_00001943	0	0.440452	0.703038	112198427	XM_024339551.1 Rosa chinensis cytochrome P450 86B1	0.31388	0.735952	1.70672	co_expression
TCONS_00001943	0	0.440452	0.703038	112199284	XM_024340322.1 Rosa chinensis beta-galactosidase 13-like	0	0.00823567	0.00855667	co_expression
TCONS_00001943	0	0.440452	0.703038	112199367	--	0	0.0148523	0.045218	co_expression
TCONS_00001943	0	0.440452	0.703038	112199795	--	0	0.0335413	0.0439723	co_expression
TCONS_00001943	0	0.440452	0.703038	112201221	XM_024342209.1 Rosa chinensis uncharacterized LOC112201221	0	0.012927	0.0322773	co_expression
TCONS_00001943	0	0.440452	0.703038	112203726	XM_024344651.1 Rosa chinensis uncharacterized LOC112203726	0	0.00320533	0.00399633	co_expression
TCONS_00002002	0.740239	0.018022	0.02159	--	--	--	--	--	--
TCONS_00003059	0.148675	0.568384	0	112187584	XM_024326446.1 Rosa chinensis chlorophyll a-b binding protein 151, chloroplastic-like	0.651158	1.54917	0.522964	co_expression
TCONS_00003059	0.148675	0.568384	0	112188347	XM_024327442.1 Rosa chinensis vinorine synthase-like	0.61269	1.81253	0.471769	co_expression
TCONS_00003059	0.148675	0.568384	0	112203570	XM_024344516.1 Rosa chinensis uncharacterized LOC112203570	0.0147247	0.0879683	0.00261633	co_expression
TCONS_00003295	0	2.05013	1.11944	112164942	XM_024301307.1 Rosa chinensis putative E3 ubiquitin-protein ligase XBAT31 transcript variant X1,	13.949	57.0045	42.9915	co_expression
TCONS_00003295	0	2.05013	1.11944	112166972	XM_024303910.1 Rosa chinensis chitinase 2-like	0	0.0585237	0.0139603	co_expression
TCONS_00003295	0	2.05013	1.11944	112168431	XM_024305557.1 Rosa chinensis chlorophyll a-b binding protein of LHCII type 1	2.92944	451.917	196.209	co_expression
TCONS_00003295	0	2.05013	1.11944	112173983	XM_024311669.1 Rosa chinensis thioredoxin M-type, chloroplastic-like	0.463687	4.13984	2.03916	co_expression
TCONS_00003295	0	2.05013	1.11944	112174611	XM_024312414.1 Rosa chinensis uncharacterized LOC112174611 transcript variant X1,	0	0.174609	0.162209	co_expression
TCONS_00003295	0	2.05013	1.11944	112175197	XM_024312859.1 Rosa chinensis chlorophyll a-b binding protein CP24 10A, chloroplastic	1.23295	6.00449	4.88001	co_expression
TCONS_00003295	0	2.05013	1.11944	112176365	XM_024314239.1 Rosa chinensis transcription factor PIF7-like transcript variant X1,	0	0.307534	0.196255	co_expression
TCONS_00003295	0	2.05013	1.11944	112181832	XM_024320226.1 Rosa chinensis delta(8)-fatty-acid desaturase 2-like	14.6985	43.3536	23.6314	co_expression
TCONS_00003295	0	2.05013	1.11944	112184229	XM_024322493.1 Rosa chinensis LRR receptor-like serine/threonine-protein kinase IOS1	0.714283	5.92263	3.52265	co_expression
TCONS_00003295	0	2.05013	1.11944	112188276	XM_024327366.1 Rosa chinensis uncharacterized LOC112188276	2.0608	9.55464	6.2943	co_expression
TCONS_00003295	0	2.05013	1.11944	112192234	XM_024331882.1 Rosa chinensis uncharacterized LOC112192234	0.108833	0.714729	0.291528	co_expression
TCONS_00003295	0	2.05013	1.11944	112194482	--	3.16496	15.709	10.194	co_expression
TCONS_00003295	0	2.05013	1.11944	112198514	XM_024339655.1 Rosa chinensis F-box/kelch-repeat protein At1g23390	0.0806823	0.588677	0.282429	co_expression
TCONS_00004405	0	0	1.58489	112163695	XM_024299975.1 Rosa chinensis formin-A-like	0.173084	4.68436	120.609	co_expression
TCONS_00004405	0	0	1.58489	112164254	XM_024300477.1 Rosa chinensis uncharacterized LOC112164254	0	0.088571	1.11085	co_expression
TCONS_00004405	0	0	1.58489	112164422	XM_024300615.1 Rosa chinensis receptor-like protein 2	0	0.00408733	0.043678	co_expression
TCONS_00004405	0	0	1.58489	112164697	XM_024300989.1 Rosa chinensis G-type lectin S-receptor-like serine/threonine-protein kinase SD1-1 transcript variant X1,	0.56152	2.30031	6.66181	co_expression
TCONS_00004405	0	0	1.58489	112164780	XM_024301086.1 Rosa chinensis RNA polymerase II C-terminal domain phosphatase-like 1	8.29044	7.58294	12.8016	co_expression
TCONS_00004405	0	0	1.58489	112164824	XM_024301151.1 Rosa chinensis cysteine-rich receptor-like protein kinase 29	0	0	0.255132	co_expression
TCONS_00004405	0	0	1.58489	112165006	XM_024301382.1 Rosa chinensis probable LRR receptor-like serine/threonine-protein kinase At3g47570	0.548386	0.549406	3.2014	co_expression
TCONS_00004405	0	0	1.58489	112165174	XM_024301607.1 Rosa chinensis senescence-specific cysteine protease SAG12-like	0.157512	0.658921	68.1203	co_expression
TCONS_00004405	0	0	1.58489	112165229	XM_024301678.1 Rosa chinensis NAC transcription factor 56-like	1.24929	2.83157	9.79	co_expression
TCONS_00004405	0	0	1.58489	112165328	XM_024301822.1 Rosa chinensis zinc finger protein CONSTANS-LIKE 4-like	0.429132	2.54869	11.541	co_expression
TCONS_00004405	0	0	1.58489	112165786	XM_024302433.1 Rosa chinensis uncharacterized LOC112165786	0.017317	0.952997	11.733	co_expression
TCONS_00004405	0	0	1.58489	112165832	XM_024302515.1 Rosa chinensis pathogenesis-related genes transcriptional activator PTI5-like	0.190562	0.178666	2.95841	co_expression
TCONS_00004405	0	0	1.58489	112165851	XM_024302548.1 Rosa chinensis TMV resistance protein N-like transcript variant X1,	0.0512997	0.080741	0.645438	co_expression
TCONS_00004405	0	0	1.58489	112166104	XM_024302872.1 Rosa chinensis uncharacterized LOC112166104	0.0183337	0.0801697	0.528851	co_expression
TCONS_00004405	0	0	1.58489	112166255	--	0.0246127	0.0205577	1.84399	co_expression
TCONS_00004405	0	0	1.58489	112166579	XM_024303455.1 Rosa chinensis phospholipase A1-IIgamma transcript variant X1,	0.526316	0.160217	3.00303	co_expression
TCONS_00004405	0	0	1.58489	112166858	XM_024303784.1 Rosa chinensis receptor-like protein 9DC3	0	0	0.191697	co_expression
TCONS_00004405	0	0	1.58489	112166914	XM_024303855.1 Rosa chinensis peroxidase N	0	0.063542	0.824078	co_expression
TCONS_00004405	0	0	1.58489	112166929	XM_024303866.1 Rosa chinensis probable carboxylesterase 18	0	0.0131483	0.421499	co_expression
TCONS_00004405	0	0	1.58489	112167025	XM_024303980.1 Rosa chinensis chlorophyll a-b binding protein CP26, chloroplastic	0.729868	0.699812	5.99168	co_expression
TCONS_00004405	0	0	1.58489	112167124	XM_024304092.1 Rosa chinensis uncharacterized LOC112167124	1.10656	1.72377	7.75977	co_expression
TCONS_00004405	0	0	1.58489	112167459	XM_024304487.1 Rosa chinensis sentrin-specific protease 2-like transcript variant X1,	0	0	0.0274537	co_expression
TCONS_00004405	0	0	1.58489	112167644	XM_024304690.1 Rosa chinensis 60S acidic ribosomal protein P2-like	0.277434	0.055482	3.35097	co_expression
TCONS_00004405	0	0	1.58489	112167890	XM_024304988.1 Rosa chinensis rust resistance kinase Lr10-like	0	0.0176457	0.324798	co_expression
TCONS_00004405	0	0	1.58489	112168090	XM_024305214.1 Rosa chinensis LOB domain-containing protein 4	0.308529	0.308909	7.45836	co_expression
TCONS_00004405	0	0	1.58489	112168180	XM_024305298.1 Rosa chinensis probable aminotransferase TAT2	64.5034	96.0947	221.129	co_expression
TCONS_00004405	0	0	1.58489	112168290	XM_024305409.1 Rosa chinensis protein SRG1-like	0	0	1.83544	co_expression
TCONS_00004405	0	0	1.58489	112168868	XM_024305788.1 Rosa chinensis beta-galactosidase 16-like	0.00822733	0.041531	1.56138	co_expression
TCONS_00004405	0	0	1.58489	112169321	XM_024306339.1 Rosa chinensis uncharacterized LOC112169321	0	0.0143787	0.550892	co_expression
TCONS_00004405	0	0	1.58489	112169905	XM_024307000.1 Rosa chinensis gibberellin receptor GID1B-like	58.7609	59.4975	308.245	co_expression
TCONS_00004405	0	0	1.58489	112169983	XM_024307116.1 Rosa chinensis laccase-14-like	7.00027	6.85724	30.8336	co_expression
TCONS_00004405	0	0	1.58489	112170244	XM_024307452.1 Rosa chinensis pentatricopeptide repeat-containing protein At1g06143 transcript variant X1,	0.32565	0.249072	3.39428	co_expression
TCONS_00004405	0	0	1.58489	112170318	XM_024307568.1 Rosa chinensis probable glutathione S-transferase	0.0217597	0.0246477	4.80559	co_expression
TCONS_00004405	0	0	1.58489	112170543	XM_024307870.1 Rosa chinensis glycine oxidase	1.47225	1.48478	4.7404	co_expression
TCONS_00004405	0	0	1.58489	112170589	XM_024307939.1 Rosa chinensis probable serine/threonine-protein kinase PBL10	0.576509	1.0679	3.38932	co_expression
TCONS_00004405	0	0	1.58489	112170760	XM_024308065.1 Rosa chinensis probable beta-D-xylosidase 5	0.623241	0.0445857	9.54173	co_expression
TCONS_00004405	0	0	1.58489	112171236	XM_024308448.1 Rosa chinensis uncharacterized LOC112171236	0	0	0.120533	co_expression
TCONS_00004405	0	0	1.58489	112171325	XM_024308525.1 Rosa chinensis uncharacterized LOC112171325	0.891915	0.7252	6.99665	co_expression
TCONS_00004405	0	0	1.58489	112171502	XM_024308678.1 Rosa chinensis TMV resistance protein N-like	0.0389597	0.0332547	0.394777	co_expression
TCONS_00004405	0	0	1.58489	112171527	XM_024308698.1 Rosa chinensis 12S seed storage protein CRA1-like	0	0	2.40449	co_expression
TCONS_00004405	0	0	1.58489	112171528	XM_024308699.1 Rosa chinensis 12S seed storage protein CRA1-like	0.042258	0.205252	43.4311	co_expression
TCONS_00004405	0	0	1.58489	112171874	XM_024309001.1 Rosa chinensis uncharacterized LOC112171874	0.312318	13.5484	155.548	co_expression
TCONS_00004405	0	0	1.58489	112171877	XM_024309004.1 Rosa chinensis probable beta-D-xylosidase 5	5.57449	0.530951	67.6119	co_expression
TCONS_00004405	0	0	1.58489	112172034	XM_024309191.1 Rosa chinensis ferredoxin--nitrite reductase, chloroplastic	9.49688	11.6224	37.2745	co_expression
TCONS_00004405	0	0	1.58489	112172199	XM_024309446.1 Rosa chinensis ATP-dependent Clp protease proteolytic subunit-related protein 1, chloroplastic	76.3134	83.707	54.9926	co_expression
TCONS_00004405	0	0	1.58489	112172231	XM_024309495.1 Rosa chinensis cytochrome P450 711A1 transcript variant X1,	7.50098	7.38343	26.2774	co_expression
TCONS_00004405	0	0	1.58489	112172499	XM_024309866.1 Rosa chinensis endochitinase EP3-like	0.33632	8.61945	126.268	co_expression
TCONS_00004405	0	0	1.58489	112172651	XM_024310077.1 Rosa chinensis uncharacterized LOC112172651 transcript variant X1,	1.50775	1.67752	4.43467	co_expression
TCONS_00004405	0	0	1.58489	112172844	XM_024310340.1 Rosa chinensis organ-specific protein P4	1.99103	3.62314	15.0935	co_expression
TCONS_00004405	0	0	1.58489	112173137	XM_024310704.1 Rosa chinensis alcohol dehydrogenase-like 7 transcript variant X1,	1.69505	3.07115	11.6203	co_expression
TCONS_00004405	0	0	1.58489	112173152	XM_024310724.1 Rosa chinensis B3 domain-containing protein Os01g0723500-like transcript variant X1,	0.0828417	0.0310327	1.39624	co_expression
TCONS_00004405	0	0	1.58489	112173247	XM_024310835.1 Rosa chinensis TMV resistance protein N-like transcript variant X1,	0.436726	0.543982	3.29978	co_expression
TCONS_00004405	0	0	1.58489	112173259	XM_024310851.1 Rosa chinensis probable E3 ubiquitin-protein ligase ARI7 transcript variant X1,	12.2568	13.5663	24.2589	co_expression
TCONS_00004405	0	0	1.58489	112173534	XM_024311169.1 Rosa chinensis putative disease resistance protein RGA3	0.206774	0.231558	1.00339	co_expression
TCONS_00004405	0	0	1.58489	112174092	XM_024311792.1 Rosa chinensis EG45-like domain containing protein transcript variant X1,	0.273055	0.096431	6.23631	co_expression
TCONS_00004405	0	0	1.58489	112174770	XM_024312581.1 Rosa chinensis aquaporin PIP-type-like	0	0.0159803	6.3863	co_expression
TCONS_00004405	0	0	1.58489	112175334	XM_024313007.1 Rosa chinensis disease resistance response protein 206-like	0.091747	0.067343	7.96826	co_expression
TCONS_00004405	0	0	1.58489	112175508	XM_024313178.1 Rosa chinensis protein NRT1/ PTR FAMILY 6.3	0.0766953	0.0903133	15.6397	co_expression
TCONS_00004405	0	0	1.58489	112175649	XM_024313359.1 Rosa chinensis cytochrome P450 71A1-like	0.260033	0.538169	3.95609	co_expression
TCONS_00004405	0	0	1.58489	112175810	XM_024313556.1 Rosa chinensis methanol O-anthraniloyltransferase-like	1.46562	0.330334	6.38613	co_expression
TCONS_00004405	0	0	1.58489	112176159	XM_024313983.1 Rosa chinensis cytochrome P450 71A3-like	0	1.81307	10.1892	co_expression
TCONS_00004405	0	0	1.58489	112176160	XM_024313984.1 Rosa chinensis cytochrome P450 71A3-like	0.267397	1.20741	8.64151	co_expression
TCONS_00004405	0	0	1.58489	112176261	--	0	0.077309	0.90277	co_expression
TCONS_00004405	0	0	1.58489	112176315	--	0.029565	0.010414	0.111122	co_expression
TCONS_00004405	0	0	1.58489	112176354	XM_024314228.1 Rosa chinensis uncharacterized LOC112176354	0.598367	5.03803	50.2298	co_expression
TCONS_00004405	0	0	1.58489	112176356	XM_024314230.1 Rosa chinensis protein LYK5-like	0.650106	0.31203	5.56617	co_expression
TCONS_00004405	0	0	1.58489	112176429	--	0	0.552369	4.06665	co_expression
TCONS_00004405	0	0	1.58489	112176717	XM_024314775.1 Rosa chinensis uncharacterized LOC112176717	0.679436	0.897503	3.15436	co_expression
TCONS_00004405	0	0	1.58489	112176764	XM_024314833.1 Rosa chinensis COP1-interactive protein 1-like	0.005973	0.024075	0.166112	co_expression
TCONS_00004405	0	0	1.58489	112176907	XM_024315042.1 Rosa chinensis palmitoyl-monogalactosyldiacylglycerol delta-7 desaturase, chloroplastic-like	0	0	0.426265	co_expression
TCONS_00004405	0	0	1.58489	112176968	XM_024315113.1 Rosa chinensis U-box domain-containing protein 19-like	2.79305	4.68794	144.203	co_expression
TCONS_00004405	0	0	1.58489	112176971	--	0	0	0.051071	co_expression
TCONS_00004405	0	0	1.58489	112177270	XM_024315574.1 Rosa chinensis geraniol 8-hydroxylase-like	0.748376	6.11818	185.253	co_expression
TCONS_00004405	0	0	1.58489	112177287	XM_024315588.1 Rosa chinensis uncharacterized LOC112177287	0.342177	0.240555	2.11027	co_expression
TCONS_00004405	0	0	1.58489	112177332	XM_024315628.1 Rosa chinensis ethylene-responsive transcription factor ERF114-like	0.0664947	0.293025	2.6089	co_expression
TCONS_00004405	0	0	1.58489	112177401	XM_024315694.1 Rosa chinensis probable splicing factor 3A subunit 1	0.05646	0.0573813	0.167969	co_expression
TCONS_00004405	0	0	1.58489	112177485	XM_024315775.1 Rosa chinensis uncharacterized mitochondrial protein AtMg00810-like	0	0.0476837	0.745111	co_expression
TCONS_00004405	0	0	1.58489	112177793	XM_024316048.1 Rosa chinensis expansin-like B1	0.16524	0.0358307	7.59461	co_expression
TCONS_00004405	0	0	1.58489	112177808	XM_024316061.1 Rosa chinensis NAC domain-containing protein 67-like	0.00190333	0.00923233	0.272048	co_expression
TCONS_00004405	0	0	1.58489	112177840	XM_024316090.1 Rosa chinensis probable LRR receptor-like serine/threonine-protein kinase At1g56140	0.0494887	0.0565257	0.386655	co_expression
TCONS_00004405	0	0	1.58489	112177845	--	0.0631717	0.716815	19.0173	co_expression
TCONS_00004405	0	0	1.58489	112177927	--	0.132354	5.34114	34.6594	co_expression
TCONS_00004405	0	0	1.58489	112178337	XM_024316493.1 Rosa chinensis uncharacterized LOC112178337	0	0	0.963303	co_expression
TCONS_00004405	0	0	1.58489	112178610	XM_024316780.1 Rosa chinensis receptor-like protein EIX2 transcript variant X1,	0.135819	0.0923097	3.06626	co_expression
TCONS_00004405	0	0	1.58489	112178719	XM_024316913.1 Rosa chinensis protein NRT1/ PTR FAMILY 2.10-like	0.0528563	0.185852	11.9034	co_expression
TCONS_00004405	0	0	1.58489	112178770	XM_024316985.1 Rosa chinensis glutathione S-transferase F13-like	0.550976	1.40886	26.4814	co_expression
TCONS_00004405	0	0	1.58489	112178846	XM_024317091.1 Rosa chinensis uncharacterized LOC112178846	0.142907	0.164717	4.33558	co_expression
TCONS_00004405	0	0	1.58489	112179049	XM_024317364.1 Rosa chinensis protein P21-like	0.671207	1.98518	66.9822	co_expression
TCONS_00004405	0	0	1.58489	112179092	XM_024317418.1 Rosa chinensis phytochrome-interacting ankyrin-repeat protein 2-like	22.8294	24.6721	42.9231	co_expression
TCONS_00004405	0	0	1.58489	112179279	XM_024317650.1 Rosa chinensis uncharacterized protein At3g17950	2.49737	5.3173	18.6349	co_expression
TCONS_00004405	0	0	1.58489	112179284	XM_024317666.1 Rosa chinensis subtilisin-like protease SBT1.1	0.326142	0.172399	8.77991	co_expression
TCONS_00004405	0	0	1.58489	112179289	XM_024317667.1 Rosa chinensis probable glycerol-3-phosphate acyltransferase 3	0.390924	3.15271	88.8301	co_expression
TCONS_00004405	0	0	1.58489	112179311	XM_024317698.1 Rosa chinensis probable trehalose-phosphate phosphatase D	0.341542	3.82992	37.3306	co_expression
TCONS_00004405	0	0	1.58489	112179559	XM_024318016.1 Rosa chinensis protein NRT1/ PTR FAMILY 4.3-like	0.04274	0.39609	9.57622	co_expression
TCONS_00004405	0	0	1.58489	112179671	XM_024318127.1 Rosa chinensis proline transporter 2-like transcript variant X1,	0	0	1.78665	co_expression
TCONS_00004405	0	0	1.58489	112179707	XM_024318170.1 Rosa chinensis wall-associated receptor kinase-like 22	0	0	0.126254	co_expression
TCONS_00004405	0	0	1.58489	112179936	XM_024318428.1 Rosa chinensis (R,S)-reticuline 7-O-methyltransferase-like	0	0	0.236779	co_expression
TCONS_00004405	0	0	1.58489	112180113	XM_024318620.1 Rosa chinensis NDR1/HIN1-like protein 6	1.26524	4.54643	31.8825	co_expression
TCONS_00004405	0	0	1.58489	112180161	XM_024318667.1 Rosa chinensis mannose-6-phosphate isomerase 1-like	7.06325	7.95539	37.3952	co_expression
TCONS_00004405	0	0	1.58489	112180252	XM_024318769.1 Rosa chinensis protein PIN-LIKES 3-like	17.1683	24.7814	99.9073	co_expression
TCONS_00004405	0	0	1.58489	112180290	XM_024318818.1 Rosa chinensis disease resistance protein RGA2-like transcript variant X1,	1.39906	1.74316	7.28669	co_expression
TCONS_00004405	0	0	1.58489	112180450	XM_024319016.1 Rosa chinensis disease resistance protein RPM1-like	0.104663	0.41493	1.64408	co_expression
TCONS_00004405	0	0	1.58489	112180566	XM_024319121.1 Rosa chinensis probable serine/threonine-protein kinase PBL11	0	0.00953633	0.503874	co_expression
TCONS_00004405	0	0	1.58489	112181292	--	0	0	0.0623413	co_expression
TCONS_00004405	0	0	1.58489	112181590	XM_024319966.1 Rosa chinensis putative disease resistance protein RGA1	0.020579	0.049782	0.723799	co_expression
TCONS_00004405	0	0	1.58489	112181639	--	0.0335193	0.0834597	1.17872	co_expression
TCONS_00004405	0	0	1.58489	112181741	XM_024320126.1 Rosa chinensis probable polygalacturonase	0.783903	2.0947	139.708	co_expression
TCONS_00004405	0	0	1.58489	112181980	XM_024320392.1 Rosa chinensis protein TSS transcript variant X1,	0.755471	0.666593	3.49177	co_expression
TCONS_00004405	0	0	1.58489	112181992	XM_024320415.1 Rosa chinensis calcineurin B-like protein 7 transcript variant X1,	0.194034	0.258537	2.85696	co_expression
TCONS_00004405	0	0	1.58489	112181995	XM_024320419.1 Rosa chinensis probable E3 ubiquitin-protein ligase RHB1A transcript variant X1,	1.59483	3.20422	16.2081	co_expression
TCONS_00004405	0	0	1.58489	112182365	XM_024320848.1 Rosa chinensis probable acetyltransferase NATA1-like	5.8491	5.05915	22.9079	co_expression
TCONS_00004405	0	0	1.58489	112182660	XM_024321177.1 Rosa chinensis 40S ribosomal protein S28-like transcript variant X1,	0	0	0.501511	co_expression
TCONS_00004405	0	0	1.58489	112182730	XM_024321264.1 Rosa chinensis receptor-like cytoplasmic kinase 176 transcript variant X1,	0.239501	0.327765	1.50751	co_expression
TCONS_00004405	0	0	1.58489	112182784	XM_024321325.1 Rosa chinensis CASP-like protein 4D1	0	0.0487713	0.732321	co_expression
TCONS_00004405	0	0	1.58489	112182811	XM_024321359.1 Rosa chinensis phenolic glucoside malonyltransferase 2-like	0	0	0.136936	co_expression
TCONS_00004405	0	0	1.58489	112183508	XM_024321895.1 Rosa chinensis probable protein phosphatase 2C 8 transcript variant X1,	0.567466	1.90796	12.3104	co_expression
TCONS_00004405	0	0	1.58489	112183557	--	0	0.0529147	1.22371	co_expression
TCONS_00004405	0	0	1.58489	112183877	XM_024322192.1 Rosa chinensis uncharacterized LOC112183877	4.45394	11.6725	40.0912	co_expression
TCONS_00004405	0	0	1.58489	112183944	XM_024322265.1 Rosa chinensis uncharacterized LOC112183944	0	0.0275053	0.146812	co_expression
TCONS_00004405	0	0	1.58489	112183985	XM_024322300.1 Rosa chinensis protein ALP1-like	0.0534573	0.0256717	0.774586	co_expression
TCONS_00004405	0	0	1.58489	112184248	XM_024322512.1 Rosa chinensis putative nuclease HARBI1	0.322824	0.371179	1.50574	co_expression
TCONS_00004405	0	0	1.58489	112184251	XM_024322518.1 Rosa chinensis uncharacterized LOC112184251	0	0	0.0452553	co_expression
TCONS_00004405	0	0	1.58489	112184591	XM_024322852.1 Rosa chinensis NDR1/HIN1-like protein 26	0.104053	0.730437	9.97499	co_expression
TCONS_00004405	0	0	1.58489	112184716	XM_024322953.1 Rosa chinensis uncharacterized LOC112184716	0.011095	0	0.157814	co_expression
TCONS_00004405	0	0	1.58489	112184743	XM_024322985.1 Rosa chinensis uncharacterized LOC112184743	0.009424	0	0.0866157	co_expression
TCONS_00004405	0	0	1.58489	112184829	XM_024323066.1 Rosa chinensis L-type lectin-domain containing receptor kinase VIII.1-like	0.473616	0.892311	6.88104	co_expression
TCONS_00004405	0	0	1.58489	112184883	XM_024323117.1 Rosa chinensis transmembrane 9 superfamily member 11	73.4391	71.5851	112.76	co_expression
TCONS_00004405	0	0	1.58489	112185043	XM_024323253.1 Rosa chinensis protein NRT1/ PTR FAMILY 4.3-like	0	0	0.630965	co_expression
TCONS_00004405	0	0	1.58489	112185088	XM_024323299.1 Rosa chinensis coatomer subunit beta'-1-like	0.567967	1.13449	14.9627	co_expression
TCONS_00004405	0	0	1.58489	112185089	XM_024323300.1 Rosa chinensis coatomer subunit beta'-1-like	0	0.0482463	3.83873	co_expression
TCONS_00004405	0	0	1.58489	112185223	XM_024323426.1 Rosa chinensis uncharacterized LOC112185223	5.79672	7.57324	36.6103	co_expression
TCONS_00004405	0	0	1.58489	112185394	XM_024323637.1 Rosa chinensis ER lumen protein-retaining receptor-like	11.1189	16.1412	49.402	co_expression
TCONS_00004405	0	0	1.58489	112185407	XM_024323654.1 Rosa chinensis laccase-15-like	0.609156	29.5432	416.125	co_expression
TCONS_00004405	0	0	1.58489	112185595	XM_024323857.1 Rosa chinensis respiratory burst oxidase homolog protein E	0	0.039746	0.409284	co_expression
TCONS_00004405	0	0	1.58489	112185747	XM_024324059.1 Rosa chinensis polyadenylation and cleavage factor homolog 4-like	0.263714	0.229659	0.792174	co_expression
TCONS_00004405	0	0	1.58489	112185936	XM_024324265.1 Rosa chinensis lachrymatory-factor synthase-like	0.929213	5.22844	20.9421	co_expression
TCONS_00004405	0	0	1.58489	112186068	XM_024324426.1 Rosa chinensis long chain acyl-CoA synthetase 8-like	0.197107	0.443931	5.95748	co_expression
TCONS_00004405	0	0	1.58489	112186455	XM_024324890.1 Rosa chinensis aminopeptidase M1-like transcript variant X1,	0.180185	0.157185	4.92374	co_expression
TCONS_00004405	0	0	1.58489	112186456	XM_024324894.1 Rosa chinensis aminopeptidase M1-like transcript variant X1,	0.0906577	0.142563	1.71139	co_expression
TCONS_00004405	0	0	1.58489	112186544	XM_024324993.1 Rosa chinensis uncharacterized LOC112186544	0.121985	0.073726	4.9687	co_expression
TCONS_00004405	0	0	1.58489	112186570	XM_024325034.1 Rosa chinensis receptor like protein 7-like transcript variant X1,	0.162957	0.274099	2.09596	co_expression
TCONS_00004405	0	0	1.58489	112186612	XM_024325078.1 Rosa chinensis dynein light chain 1, cytoplasmic-like	6.25399	5.14464	34.1019	co_expression
TCONS_00004405	0	0	1.58489	112186817	XM_024325348.1 Rosa chinensis auxin-responsive protein IAA26-like	1.32597	2.20234	14.8564	co_expression
TCONS_00004405	0	0	1.58489	112187089	XM_024325735.1 Rosa chinensis chloride channel protein CLC-b	0.342121	0.063921	5.82165	co_expression
TCONS_00004405	0	0	1.58489	112187138	XM_024325795.1 Rosa chinensis class V chitinase-like	0	0.0835223	1.80603	co_expression
TCONS_00004405	0	0	1.58489	112187155	XM_024325820.1 Rosa chinensis heat shock factor protein HSF24	1.84523	1.8868	53.5752	co_expression
TCONS_00004405	0	0	1.58489	112187187	XM_024325869.1 Rosa chinensis wall-associated receptor kinase-like 22 transcript variant X1,	0.00771667	0.379922	2.18839	co_expression
TCONS_00004405	0	0	1.58489	112187328	XM_024326081.1 Rosa chinensis formin-like protein 13	0	0.0163023	0.237889	co_expression
TCONS_00004405	0	0	1.58489	112187549	XM_024326396.1 Rosa chinensis class V chitinase-like	0.0270643	2.49625	11.5955	co_expression
TCONS_00004405	0	0	1.58489	112187659	XM_024326541.1 Rosa chinensis B-box zinc finger protein 32-like	0.0350837	0.202151	5.86597	co_expression
TCONS_00004405	0	0	1.58489	112187900	XM_024326865.1 Rosa chinensis subtilisin-like protease SBT5.3	0.027918	0.405087	5.05662	co_expression
TCONS_00004405	0	0	1.58489	112188045	XM_024327062.1 Rosa chinensis cysteine-rich receptor-like protein kinase 7 transcript variant X1,	0.0973013	0.820322	9.20296	co_expression
TCONS_00004405	0	0	1.58489	112188085	XM_024327108.1 Rosa chinensis aspartic proteinase A1-like	73.1509	83.6827	129.592	co_expression
TCONS_00004405	0	0	1.58489	112188121	XM_024327169.1 Rosa chinensis protein trichome birefringence-like 39	29.775	95.5951	349.53	co_expression
TCONS_00004405	0	0	1.58489	112188273	XM_024327363.1 Rosa chinensis lachrymatory-factor synthase-like	0.905442	4.59207	17.7611	co_expression
TCONS_00004405	0	0	1.58489	112188328	XM_024327419.1 Rosa chinensis cellulose synthase-like protein H1 transcript variant X1,	0.108141	0.0572777	3.13625	co_expression
TCONS_00004405	0	0	1.58489	112188382	XM_024327486.1 Rosa chinensis E3 ubiquitin-protein ligase ATL41-like	0.03576	0.0209863	0.59203	co_expression
TCONS_00004405	0	0	1.58489	112188580	XM_024327723.1 Rosa chinensis phenolic glucoside malonyltransferase 2-like	0.0345267	0.593973	5.44712	co_expression
TCONS_00004405	0	0	1.58489	112188586	XM_024327732.1 Rosa chinensis beta-galactosidase-like transcript variant X1,	1.80772	0.97552	36.5135	co_expression
TCONS_00004405	0	0	1.58489	112188596	XM_024327743.1 Rosa chinensis phosphatidylinositol/phosphatidylcholine transfer protein SFH12-like transcript variant X1,	0.00407333	0.418464	2.95799	co_expression
TCONS_00004405	0	0	1.58489	112188612	XM_024327764.1 Rosa chinensis peroxidase P7-like	0.0265457	0.803882	11.5057	co_expression
TCONS_00004405	0	0	1.58489	112188712	XM_024327888.1 Rosa chinensis transcription factor TGA4-like transcript variant X1,	0.009255	0.315115	3.48308	co_expression
TCONS_00004405	0	0	1.58489	112189180	XM_024328457.1 Rosa chinensis codeine O-demethylase-like	0.15177	5.75225	35.6754	co_expression
TCONS_00004405	0	0	1.58489	112189298	XM_024328603.1 Rosa chinensis 2-alkenal reductase (NADP(+)-dependent)-like	44.0317	88.5793	244.685	co_expression
TCONS_00004405	0	0	1.58489	112189312	XM_024328615.1 Rosa chinensis myb-related protein 308-like	0.215674	1.54857	6.53456	co_expression
TCONS_00004405	0	0	1.58489	112189352	XM_024328667.1 Rosa chinensis ankyrin repeat-containing protein ITN1-like transcript variant X1,	0.322812	0.35	0.0566943	co_expression
TCONS_00004405	0	0	1.58489	112189355	XM_024328669.1 Rosa chinensis monooxygenase 2-like transcript variant X1,	0.180673	3.79616	18.2856	co_expression
TCONS_00004405	0	0	1.58489	112189571	XM_024328916.1 Rosa chinensis auxin-binding protein ABP19a-like	7.70263	6.87632	47.9639	co_expression
TCONS_00004405	0	0	1.58489	112189645	XM_024328992.1 Rosa chinensis uncharacterized LOC112189645	0	0.560511	2.08177	co_expression
TCONS_00004405	0	0	1.58489	112189667	XM_024329015.1 Rosa chinensis reticulon-like protein B17	0	0	0.112609	co_expression
TCONS_00004405	0	0	1.58489	112189762	XM_024329111.1 Rosa chinensis pre- cleavage factor Im 25 kDa subunit 1 mRNA	0.37947	0.309393	3.18445	co_expression
TCONS_00004405	0	0	1.58489	112190089	XM_024329516.1 Rosa chinensis uncharacterized LOC112190089	0.0136117	0.0658803	1.42751	co_expression
TCONS_00004405	0	0	1.58489	112190146	XM_024329563.1 Rosa chinensis aldehyde dehydrogenase family 2 member C4-like	0.0197243	0.0221187	4.05893	co_expression
TCONS_00004405	0	0	1.58489	112190521	XM_024329956.1 Rosa chinensis 2-alkenal reductase (NADP(+)-dependent)-like	3.07079	3.26946	17.065	co_expression
TCONS_00004405	0	0	1.58489	112191391	XM_024330735.1 Rosa chinensis serine carboxypeptidase-like 20 transcript variant X1,	2.31997	1.83082	8.38562	co_expression
TCONS_00004405	0	0	1.58489	112191489	XM_024330839.1 Rosa chinensis agamous-like MADS-box protein AGL15 transcript variant X1,	2.3533	2.68777	9.76735	co_expression
TCONS_00004405	0	0	1.58489	112191898	XM_024331380.1 Rosa chinensis serine/threonine-protein kinase CTR1 transcript variant X2,	13.8892	16.2876	27.3339	co_expression
TCONS_00004405	0	0	1.58489	112192085	XM_024331620.1 Rosa chinensis receptor-like protein kinase FERONIA	0.321686	0.228575	1.80623	co_expression
TCONS_00004405	0	0	1.58489	112192197	--	0	0.0357457	0.949324	co_expression
TCONS_00004405	0	0	1.58489	112192257	XM_024331912.1 Rosa chinensis probable WRKY transcription factor 23	0.0428217	0.0350623	0.7863	co_expression
TCONS_00004405	0	0	1.58489	112192281	XM_024331938.1 Rosa chinensis exportin-7 transcript variant X1,	16.4659	17.1942	19.9326	co_expression
TCONS_00004405	0	0	1.58489	112192323	XM_024331985.1 Rosa chinensis aldehyde dehydrogenase family 2 member C4-like transcript variant X1,	0	0.067366	0.989192	co_expression
TCONS_00004405	0	0	1.58489	112192325	XM_024331987.1 Rosa chinensis aldehyde dehydrogenase family 2 member C4-like	0	0.016978	0.811966	co_expression
TCONS_00004405	0	0	1.58489	112192552	XM_024332342.1 Rosa chinensis aspartic proteinase-like transcript variant X1,	1.58742	6.47081	54.6029	co_expression
TCONS_00004405	0	0	1.58489	112192684	XM_024332533.1 Rosa chinensis probable glycosyltransferase At5g03795 transcript variant X1,	0.25405	0.107592	1.63076	co_expression
TCONS_00004405	0	0	1.58489	112192707	XM_024332557.1 Rosa chinensis probable glutathione S-transferase	0.189367	4.28775	29.4298	co_expression
TCONS_00004405	0	0	1.58489	112192730	XM_024332589.1 Rosa chinensis RING-H2 finger protein ATL5-like	0.013883	0.0588513	2.70665	co_expression
TCONS_00004405	0	0	1.58489	112192856	XM_024332758.1 Rosa chinensis aquaporin PIP2-1-like	5.04519	21.3385	104.743	co_expression
TCONS_00004405	0	0	1.58489	112192999	XM_024332986.1 Rosa chinensis cytochrome P450 714C2-like	0.370572	0.437206	8.17331	co_expression
TCONS_00004405	0	0	1.58489	112193303	XM_024333382.1 Rosa chinensis gibberellin 2-beta-dioxygenase 2	0	0.0493753	0.685867	co_expression
TCONS_00004405	0	0	1.58489	112193593	XM_024333782.1 Rosa chinensis uncharacterized LOC112193593	0.056393	0.109135	0.679702	co_expression
TCONS_00004405	0	0	1.58489	112194158	XM_024334410.1 Rosa chinensis uncharacterized LOC112194158	0.024012	0.0193647	0.443806	co_expression
TCONS_00004405	0	0	1.58489	112194457	XM_024334694.1 Rosa chinensis ornithine decarboxylase-like	0	0.13215	8.3751	co_expression
TCONS_00004405	0	0	1.58489	112194523	XM_024334752.1 Rosa chinensis protein ALP1-like	0	0.0434067	2.41835	co_expression
TCONS_00004405	0	0	1.58489	112194600	--	0.206096	1.85577	16.3416	co_expression
TCONS_00004405	0	0	1.58489	112194729	XM_024334949.1 Rosa chinensis exocyst complex component EXO70H1-like	0.046081	0.204439	6.22762	co_expression
TCONS_00004405	0	0	1.58489	112194770	XM_024334996.1 Rosa chinensis chymomexicain-like transcript variant X1,	0.0278267	0.518527	16.1858	co_expression
TCONS_00004405	0	0	1.58489	112194801	XM_024335032.1 Rosa chinensis histone H2A.1	2.88395	3.5015	9.47502	co_expression
TCONS_00004405	0	0	1.58489	112194826	--	0.33901	0.335773	0.87005	co_expression
TCONS_00004405	0	0	1.58489	112194832	XM_024335071.1 Rosa chinensis chymomexicain-like transcript variant X1,	0.0360583	0.513085	15.0557	co_expression
TCONS_00004405	0	0	1.58489	112195215	XM_024335589.1 Rosa chinensis probable WRKY transcription factor 27	0.0416697	0.068104	0.567781	co_expression
TCONS_00004405	0	0	1.58489	112195238	XM_024335613.1 Rosa chinensis uncharacterized LOC112195238	0.60026	0.740855	3.86531	co_expression
TCONS_00004405	0	0	1.58489	112195370	XM_024335782.1 Rosa chinensis cationic peroxidase 1-like	0.565216	3.24887	77.9294	co_expression
TCONS_00004405	0	0	1.58489	112195787	XM_024335986.1 Rosa chinensis E3 ubiquitin-protein ligase RGLG2-like	0.015166	0.0222347	0.726875	co_expression
TCONS_00004405	0	0	1.58489	112195984	XM_024336244.1 Rosa chinensis sugar transport protein 13-like	0.163534	0.77899	22.4236	co_expression
TCONS_00004405	0	0	1.58489	112196066	XM_024336348.1 Rosa chinensis uncharacterized LOC112196066	0.074472	0.423984	9.88762	co_expression
TCONS_00004405	0	0	1.58489	112196137	XM_024336441.1 Rosa chinensis protein DMP2-like	3.73824	0.469909	21.659	co_expression
TCONS_00004405	0	0	1.58489	112196419	XM_024336772.1 Rosa chinensis homeobox protein knotted-1-like 1	0.045096	0	1.4153	co_expression
TCONS_00004405	0	0	1.58489	112196516	XM_024336884.1 Rosa chinensis GTP 3',8-cyclase, mitochondrial transcript variant X1,	5.81819	6.3781	13.5352	co_expression
TCONS_00004405	0	0	1.58489	112196606	XM_024337001.1 Rosa chinensis cytochrome P450 CYP749A22-like	0.009057	0	0.502825	co_expression
TCONS_00004405	0	0	1.58489	112196951	XM_024337452.1 Rosa chinensis putative beta-D-xylosidase	10.3274	493.123	3829.23	co_expression
TCONS_00004405	0	0	1.58489	112196971	XM_024337478.1 Rosa chinensis uncharacterized LOC112196971	0	0.0207587	1.10064	co_expression
TCONS_00004405	0	0	1.58489	112196972	XM_024337476.1 Rosa chinensis endochitinase EP3-like	2.32342	79.7464	384.526	co_expression
TCONS_00004405	0	0	1.58489	112196973	XM_024337477.1 Rosa chinensis endochitinase EP3-like	0.817167	43.7448	413.757	co_expression
TCONS_00004405	0	0	1.58489	112197005	XM_024337524.1 Rosa chinensis geraniol 8-hydroxylase-like	0.161084	0.013062	0.627712	co_expression
TCONS_00004405	0	0	1.58489	112197127	XM_024337700.1 Rosa chinensis transcription factor TGA2.2-like	0.0103167	0.301657	1.78792	co_expression
TCONS_00004405	0	0	1.58489	112197173	XM_024337753.1 Rosa chinensis protein NPGR2-like transcript variant X1,	5.81176	4.63928	15.38	co_expression
TCONS_00004405	0	0	1.58489	112197429	XM_024338095.1 Rosa chinensis putative glutamine amidotransferase GAT1_2.1	0.605308	1.96328	22.398	co_expression
TCONS_00004405	0	0	1.58489	112197448	XM_024338123.1 Rosa chinensis uncharacterized LOC112197448	0	0	0.612867	co_expression
TCONS_00004405	0	0	1.58489	112197658	--	0.129935	2.03015	14.8391	co_expression
TCONS_00004405	0	0	1.58489	112197900	XM_024338858.1 Rosa chinensis VAN3-binding protein	0.19957	9.65827	80.3516	co_expression
TCONS_00004405	0	0	1.58489	112197962	XM_024338947.1 Rosa chinensis cysteine--tRNA ligase 2, cytoplasmic	19.6819	17.7009	30.2304	co_expression
TCONS_00004405	0	0	1.58489	112198017	XM_024339023.1 Rosa chinensis protein XRI1	0.298533	0.964021	7.50945	co_expression
TCONS_00004405	0	0	1.58489	112198153	XM_024339220.1 Rosa chinensis homeobox-leucine zipper protein HOX3	0	0	0.357659	co_expression
TCONS_00004405	0	0	1.58489	112198176	XM_024339246.1 Rosa chinensis primary amine oxidase-like	0.0279117	4.24631	24.8593	co_expression
TCONS_00004405	0	0	1.58489	112198193	XM_024339275.1 Rosa chinensis protein ROOT PRIMORDIUM DEFECTIVE 1 transcript variant X1,	0.227597	0.16911	0.693405	co_expression
TCONS_00004405	0	0	1.58489	112198353	XM_024339459.1 Rosa chinensis snakin-2-like	0	0.100243	1.10049	co_expression
TCONS_00004405	0	0	1.58489	112198523	XM_024339667.1 Rosa chinensis protein RALF-like 32	6.95225	2.69297	24.0242	co_expression
TCONS_00004405	0	0	1.58489	112198573	XM_024339728.1 Rosa chinensis U-box domain-containing protein 35-like	0	0.301126	2.95654	co_expression
TCONS_00004405	0	0	1.58489	112199035	XM_024340101.1 Rosa chinensis uncharacterized LOC112199035	0.0308367	0	0.254278	co_expression
TCONS_00004405	0	0	1.58489	112199150	XM_024340211.1 Rosa chinensis receptor-like serine/threonine-protein kinase SD1-8	0	0.0151757	0.449581	co_expression
TCONS_00004405	0	0	1.58489	112199182	XM_024340231.1 Rosa chinensis uncharacterized LOC112199182	0	0	0.677998	co_expression
TCONS_00004405	0	0	1.58489	112199188	XM_024340238.1 Rosa chinensis protein ALP1-like	0.00797467	0.0648467	0.775805	co_expression
TCONS_00004405	0	0	1.58489	112199234	XM_024340279.1 Rosa chinensis G-type lectin S-receptor-like serine/threonine-protein kinase RKS1	0	0.166139	1.07809	co_expression
TCONS_00004405	0	0	1.58489	112199344	XM_024340373.1 Rosa chinensis probable FBD-associated F-box protein At1g32375	0	0	0.542867	co_expression
TCONS_00004405	0	0	1.58489	112199566	--	0.008312	0.0523803	0.786304	co_expression
TCONS_00004405	0	0	1.58489	112199792	--	0	0	0.14476	co_expression
TCONS_00004405	0	0	1.58489	112200007	XM_024341002.1 Rosa chinensis uncharacterized LOC112200007	1.23411	3.77592	16.735	co_expression
TCONS_00004405	0	0	1.58489	112200084	XM_024341098.1 Rosa chinensis transcription factor MYB108	0.938837	5.38494	77.0887	co_expression
TCONS_00004405	0	0	1.58489	112200143	XM_024341155.1 Rosa chinensis auxin-responsive protein IAA33	0.952814	0.187173	4.77993	co_expression
TCONS_00004405	0	0	1.58489	112200186	XM_024341205.1 Rosa chinensis chaperone protein dnaJ C76, chloroplastic	1.23545	6.23782	31.1871	co_expression
TCONS_00004405	0	0	1.58489	112200303	--	0.522497	0.748822	6.93985	co_expression
TCONS_00004405	0	0	1.58489	112200417	XM_024341449.1 Rosa chinensis protein PLANT CADMIUM RESISTANCE 2-like	0.593977	1.24812	8.50503	co_expression
TCONS_00004405	0	0	1.58489	112200446	XM_024341481.1 Rosa chinensis probable enoyl-CoA hydratase 1, peroxisomal transcript variant X1,	5.78774	6.18277	11.8618	co_expression
TCONS_00004405	0	0	1.58489	112200657	--	0.0626717	0.0339563	1.22447	co_expression
TCONS_00004405	0	0	1.58489	112200668	--	0.199326	0.123226	4.62073	co_expression
TCONS_00004405	0	0	1.58489	112201339	XM_024342223.1 Rosa chinensis putative receptor-like protein kinase At4g00960 transcript variant X1,	0.0783923	0.381073	1.9298	co_expression
TCONS_00004405	0	0	1.58489	112201502	XM_024342385.1 Rosa chinensis ABSCISIC ACID-INSENSITIVE 5-like protein 1 transcript variant X1,	0.0540077	0.035863	0.731485	co_expression
TCONS_00004405	0	0	1.58489	112201620	XM_024342521.1 Rosa chinensis TMV resistance protein N-like transcript variant X1,	0.0553513	0.0192273	0.214468	co_expression
TCONS_00004405	0	0	1.58489	112201708	XM_024342620.1 Rosa chinensis dnaJ protein P58IPK homolog B-like	0	0.0562557	0.337189	co_expression
TCONS_00004405	0	0	1.58489	112201754	XM_024342674.1 Rosa chinensis protein ACCELERATED CELL DEATH 6-like transcript variant X1,	0.482389	0.16084	1.44465	co_expression
TCONS_00004405	0	0	1.58489	112201767	XM_024342686.1 Rosa chinensis probable polyamine transporter At3g13620	0.0212247	0.0934593	0.830726	co_expression
TCONS_00004405	0	0	1.58489	112201852	XM_024342775.1 Rosa chinensis alpha,alpha-trehalose-phosphate synthase [UDP-forming] 1-like transcript variant X1,	0.104821	0.0325823	0.857019	co_expression
TCONS_00004405	0	0	1.58489	112201963	XM_024342890.1 Rosa chinensis glucan endo-1,3-beta-glucosidase-like	0.788142	5.44709	73.7872	co_expression
TCONS_00004405	0	0	1.58489	112201986	XM_024342910.1 Rosa chinensis indole-3-acetaldehyde oxidase-like	6.72834	4.42791	21.1967	co_expression
TCONS_00004405	0	0	1.58489	112202273	XM_024343214.1 Rosa chinensis uncharacterized LOC112202273	0	0.0358347	0.258171	co_expression
TCONS_00004405	0	0	1.58489	112202300	XM_024343245.1 Rosa chinensis nudix hydrolase 10-like transcript variant X1,	0.48179	5.41995	103.21	co_expression
TCONS_00004405	0	0	1.58489	112202340	XM_024343327.1 Rosa chinensis uncharacterized protein At2g29880-like	0.1095	0.129359	0.825428	co_expression
TCONS_00004405	0	0	1.58489	112202547	XM_024343556.1 Rosa chinensis heavy metal-associated isoprenylated plant protein 29	0.374526	0.1606	3.79855	co_expression
TCONS_00004405	0	0	1.58489	112202634	XM_024343632.1 Rosa chinensis restin homolog	12.5324	13.0464	17.9033	co_expression
TCONS_00004405	0	0	1.58489	112202744	XM_024343780.1 Rosa chinensis probable rRNA-processing protein EBP2 homolog	0.652004	0.575414	3.28794	co_expression
TCONS_00004405	0	0	1.58489	112202800	XM_024343809.1 Rosa chinensis transcription factor bHLH30-like	1.0256	1.04732	7.16729	co_expression
TCONS_00004405	0	0	1.58489	112202832	XM_024343846.1 Rosa chinensis G-type lectin S-receptor-like serine/threonine-protein kinase SD1-1 transcript variant X1,	0.101053	0.225138	1.05431	co_expression
TCONS_00004405	0	0	1.58489	112202833	XM_024343848.1 Rosa chinensis G-type lectin S-receptor-like serine/threonine-protein kinase SD1-1	0.024958	0.0214083	0.42497	co_expression
TCONS_00004405	0	0	1.58489	112203248	XM_024344241.1 Rosa chinensis receptor-like protein EIX2	0.00667233	0.021448	0.302788	co_expression
TCONS_00004405	0	0	1.58489	112203261	XM_024344251.1 Rosa chinensis receptor-like protein EIX2	0.0101277	0.0537513	0.424948	co_expression
TCONS_00004405	0	0	1.58489	112203992	XM_024344881.1 Rosa chinensis nudix hydrolase 10-like	1.7701	7.0492	116.648	co_expression
TCONS_00004405	0	0	1.58489	XLOC_050865	--	0	0.0534337	0.492009	co_expression
TCONS_00004406	0	14.8904	6.47269	112198570	XM_024339727.1 Rosa chinensis F-box/LRR-repeat protein At3g48880-like	0	0.111824	0.054311	co_expression
TCONS_00005450	0	0.988013	4.20068	112164534	XM_024300750.1 Rosa chinensis potassium channel KAT3-like	0.0631833	3.54799	11.5778	co_expression
TCONS_00005450	0	0.988013	4.20068	112164884	XM_024301229.1 Rosa chinensis nuclear transcription factor Y subunit A-7 transcript variant X1,	13.9697	14.0257	23.8188	co_expression
TCONS_00005450	0	0.988013	4.20068	112164895	XM_024301248.1 Rosa chinensis uncharacterized LOC112164895	2.93919	78.3834	976.56	co_expression
TCONS_00005450	0	0.988013	4.20068	112165244	XM_024301710.1 Rosa chinensis beta-glucosidase 11-like	0.00944733	4.09939	14.99	co_expression
TCONS_00005450	0	0.988013	4.20068	112165308	XM_024301801.1 Rosa chinensis beta-glucosidase 11-like transcript variant X1,	2.19885	3.31759	7.45076	co_expression
TCONS_00005450	0	0.988013	4.20068	112165379	XM_024301872.1 Rosa chinensis probable serine/threonine-protein kinase WNK4 transcript variant X1,	5.42187	14.3982	39.1553	co_expression
TCONS_00005450	0	0.988013	4.20068	112165496	XM_024302040.1 Rosa chinensis N-acetyl-alpha-D-glucosaminyl L-malate synthase	0.148366	0.384592	2.1557	co_expression
TCONS_00005450	0	0.988013	4.20068	112165529	XM_024302075.1 Rosa chinensis transcription factor bHLH122-like	1.96799	5.94201	17.9383	co_expression
TCONS_00005450	0	0.988013	4.20068	112165604	XM_024302179.1 Rosa chinensis uncharacterized LOC112165604	7.58204	13.0403	66.9508	co_expression
TCONS_00005450	0	0.988013	4.20068	112166105	XM_024302873.1 Rosa chinensis uncharacterized LOC112166105	5.94002	8.20118	16.1774	co_expression
TCONS_00005450	0	0.988013	4.20068	112166125	XM_024302893.1 Rosa chinensis uncharacterized LOC112166125	10.6119	16.0789	29.5711	co_expression
TCONS_00005450	0	0.988013	4.20068	112166246	XM_024303040.1 Rosa chinensis uncharacterized LOC112166246	2.66572	2.73942	7.08099	co_expression
TCONS_00005450	0	0.988013	4.20068	112166286	XM_024303087.1 Rosa chinensis microtubule-associated protein 70-5	0.392937	0.78563	2.7147	co_expression
TCONS_00005450	0	0.988013	4.20068	112166426	XM_024303265.1 Rosa chinensis sodium/calcium exchanger NCL-like transcript variant X1,	0.690716	1.75082	4.17396	co_expression
TCONS_00005450	0	0.988013	4.20068	112166436	XM_024303283.1 Rosa chinensis transmembrane protein 45B-like	0.0509427	0.587575	19.8091	co_expression
TCONS_00005450	0	0.988013	4.20068	112166457	XM_024303303.1 Rosa chinensis putative BPI/LBP family protein At1g04970	6.53834	14.8087	25.0789	co_expression
TCONS_00005450	0	0.988013	4.20068	112166768	XM_024303670.1 Rosa chinensis PAP-specific phosphatase HAL2-like	11.5031	31.0141	63.0503	co_expression
TCONS_00005450	0	0.988013	4.20068	112167124	XM_024304092.1 Rosa chinensis uncharacterized LOC112167124	1.10656	1.72377	7.75977	co_expression
TCONS_00005450	0	0.988013	4.20068	112167237	XM_024304225.1 Rosa chinensis putative methyltransferase DDB_G0268948	11.3675	78.3486	219.328	co_expression
TCONS_00005450	0	0.988013	4.20068	112167298	XR_002923693.1 Rosa chinensis uncharacterized LOC112167298 transcript variant X1, ncRNA	0.105481	0.409691	1.44642	co_expression
TCONS_00005450	0	0.988013	4.20068	112167380	XM_024304395.1 Rosa chinensis uncharacterized LOC112167380	2.04681	3.74964	11.545	co_expression
TCONS_00005450	0	0.988013	4.20068	112167390	XM_024304406.1 Rosa chinensis plastid-lipid-associated protein, chloroplastic-like	5959.19	5052.28	1235.71	co_expression
TCONS_00005450	0	0.988013	4.20068	112167529	XM_024304557.1 Rosa chinensis uncharacterized LOC112167529	2.06609	6.89709	40.1159	co_expression
TCONS_00005450	0	0.988013	4.20068	112167738	XM_024304792.1 Rosa chinensis uncharacterized LOC112167738	0.0357993	0.0844123	0.757349	co_expression
TCONS_00005450	0	0.988013	4.20068	112167889	XM_024304984.1 Rosa chinensis rust resistance kinase Lr10-like transcript variant X1,	0.0221557	0.0197107	0.413902	co_expression
TCONS_00005450	0	0.988013	4.20068	112168006	XM_024305123.1 Rosa chinensis protein ALP1-like	0.00433933	0.0772543	0.820243	co_expression
TCONS_00005450	0	0.988013	4.20068	112168053	XM_024305167.1 Rosa chinensis protein trichome birefringence-like 41	1.42536	27.7782	249.527	co_expression
TCONS_00005450	0	0.988013	4.20068	112168441	XM_024305563.1 Rosa chinensis serine carboxypeptidase-like	3.74132	9.43964	30.012	co_expression
TCONS_00005450	0	0.988013	4.20068	112168461	XM_024305579.1 Rosa chinensis cold-responsive protein kinase 1 transcript variant X1,	7.56838	12.6511	22.0536	co_expression
TCONS_00005450	0	0.988013	4.20068	112168869	XM_024305789.1 Rosa chinensis aldehyde dehydrogenase family 3 member H1-like transcript variant X1,	19.7338	32.4654	51.1263	co_expression
TCONS_00005450	0	0.988013	4.20068	112168917	XM_024305849.1 Rosa chinensis WPP domain-interacting tail-anchored protein 1-like	0.0257377	1.47101	14.6577	co_expression
TCONS_00005450	0	0.988013	4.20068	112169074	XM_024306011.1 Rosa chinensis gibberellin-regulated protein 1	47.8169	1278.1	4039.26	co_expression
TCONS_00005450	0	0.988013	4.20068	112169116	XM_024306066.1 Rosa chinensis cyclin-D4-1-like	0.016488	1.58613	6.23566	co_expression
TCONS_00005450	0	0.988013	4.20068	112169142	XM_024306122.1 Rosa chinensis auxin-responsive protein IAA29	1.47909	3.09631	8.72847	co_expression
TCONS_00005450	0	0.988013	4.20068	112169182	XM_024306165.1 Rosa chinensis UPF0496 protein At1g20180-like	0.0644677	2.70062	17.1714	co_expression
TCONS_00005450	0	0.988013	4.20068	112169361	XM_024306391.1 Rosa chinensis flotillin-like protein 4	0	0.123261	0.409987	co_expression
TCONS_00005450	0	0.988013	4.20068	112169956	XM_024307077.1 Rosa chinensis sarcoplasmic reticulum histidine-rich calcium-binding protein transcript variant X1,	6.66111	9.23056	17.1674	co_expression
TCONS_00005450	0	0.988013	4.20068	112169991	XM_024307125.1 Rosa chinensis uncharacterized LOC112169991	1.10873	28.1878	235.934	co_expression
TCONS_00005450	0	0.988013	4.20068	112169999	XM_024307142.1 Rosa chinensis serine/threonine-protein kinase tricorner-like transcript variant X1,	2.08959	4.44175	10.4233	co_expression
TCONS_00005450	0	0.988013	4.20068	112170185	XM_024307376.1 Rosa chinensis purple acid phosphatase-like	7.1485	11.8439	50.7694	co_expression
TCONS_00005450	0	0.988013	4.20068	112170282	XM_024307510.1 Rosa chinensis FHA domain-containing protein PS1 transcript variant X1,	0.0484047	0.185202	0.812024	co_expression
TCONS_00005450	0	0.988013	4.20068	112170285	XM_024307515.1 Rosa chinensis putative UDP-glucose glucosyltransferase	0.201046	9.2498	25.8248	co_expression
TCONS_00005450	0	0.988013	4.20068	112171759	XM_024308892.1 Rosa chinensis putative nuclease HARBI1	0.011894	0.270879	2.65535	co_expression
TCONS_00005450	0	0.988013	4.20068	112172088	XM_024309268.1 Rosa chinensis lecithin-cholesterol acyltransferase-like 1	0.569992	2.26039	9.94247	co_expression
TCONS_00005450	0	0.988013	4.20068	112172103	XM_024309287.1 Rosa chinensis wall-associated receptor kinase-like 14	0.173215	7.77207	34.1388	co_expression
TCONS_00005450	0	0.988013	4.20068	112172260	XM_024309533.1 Rosa chinensis uncharacterized LOC112172260 transcript variant X1,	1.48723	2.72413	5.27334	co_expression
TCONS_00005450	0	0.988013	4.20068	112172312	XM_024309600.1 Rosa chinensis putative methyltransferase DDB_G0268948	7.60901	50.7677	155.639	co_expression
TCONS_00005450	0	0.988013	4.20068	112172425	XM_024309767.1 Rosa chinensis bidirectional sugar transporter SWEET1-like transcript variant X1,	51.6891	248.494	649.002	co_expression
TCONS_00005450	0	0.988013	4.20068	112172426	XM_024309769.1 Rosa chinensis sodium/hydrogen exchanger 3-like transcript variant X1,	3.24267	5.34385	9.82026	co_expression
TCONS_00005450	0	0.988013	4.20068	112172434	XM_024309777.1 Rosa chinensis probable E3 ubiquitin-protein ligase ARI1 transcript variant X1,	3.71555	8.86658	16.5525	co_expression
TCONS_00005450	0	0.988013	4.20068	112172499	XM_024309866.1 Rosa chinensis endochitinase EP3-like	0.33632	8.61945	126.268	co_expression
TCONS_00005450	0	0.988013	4.20068	112172867	XM_024310365.1 Rosa chinensis endoribonuclease YBEY, chloroplastic-like	3.18991	2.3359	1.10468	co_expression
TCONS_00005450	0	0.988013	4.20068	112173034	XM_024310579.1 Rosa chinensis synaptotagmin-1-like transcript variant X1,	0.884267	3.89108	16.0862	co_expression
TCONS_00005450	0	0.988013	4.20068	112173045	XM_024310594.1 Rosa chinensis transcription factor MYB33 transcript variant X1,	5.8357	6.50805	8.63305	co_expression
TCONS_00005450	0	0.988013	4.20068	112173259	XM_024310851.1 Rosa chinensis probable E3 ubiquitin-protein ligase ARI7 transcript variant X1,	12.2568	13.5663	24.2589	co_expression
TCONS_00005450	0	0.988013	4.20068	112173300	XM_024310911.1 Rosa chinensis UPF0496 protein At1g20180	0.024805	0.661545	6.38909	co_expression
TCONS_00005450	0	0.988013	4.20068	112173313	XM_024310928.1 Rosa chinensis uncharacterized LOC112173313	0.49939	2.4806	56.1682	co_expression
TCONS_00005450	0	0.988013	4.20068	112173534	XM_024311169.1 Rosa chinensis putative disease resistance protein RGA3	0.206774	0.231558	1.00339	co_expression
TCONS_00005450	0	0.988013	4.20068	112173535	XM_024311170.1 Rosa chinensis uncharacterized LOC112173535	0.19424	15.934	47.0603	co_expression
TCONS_00005450	0	0.988013	4.20068	112173549	XM_024311187.1 Rosa chinensis GATA transcription factor 5-like	2.19238	7.56223	16.6066	co_expression
TCONS_00005450	0	0.988013	4.20068	112173614	XM_024311294.1 Rosa chinensis cysteine-rich receptor-like protein kinase 7 transcript variant X1,	0.0543513	1.38255	4.75244	co_expression
TCONS_00005450	0	0.988013	4.20068	112173643	XM_024311328.1 Rosa chinensis glutamate receptor 2.8-like	0.00627567	0.0197857	0.189439	co_expression
TCONS_00005450	0	0.988013	4.20068	112173929	XM_024311612.1 Rosa chinensis gibberellin-regulated protein 11-like	2.03831	1.90278	12.6618	co_expression
TCONS_00005450	0	0.988013	4.20068	112174109	XM_024311809.1 Rosa chinensis subtilisin-like protease SBT1.7	18.1291	147.903	841.083	co_expression
TCONS_00005450	0	0.988013	4.20068	112174293	XM_024312067.1 Rosa chinensis protein NRT1/ PTR FAMILY 5.1	0.105484	0.695319	7.33738	co_expression
TCONS_00005450	0	0.988013	4.20068	112174458	XM_024312237.1 Rosa chinensis B3 domain-containing protein Os06g0194400-like transcript variant X1,	0.0628573	0.107688	0.618492	co_expression
TCONS_00005450	0	0.988013	4.20068	112174598	XM_024312397.1 Rosa chinensis uncharacterized LOC112174598	0.215423	1.02211	3.82975	co_expression
TCONS_00005450	0	0.988013	4.20068	112174770	XM_024312581.1 Rosa chinensis aquaporin PIP-type-like	0	0.0159803	6.3863	co_expression
TCONS_00005450	0	0.988013	4.20068	112175111	XM_024312779.1 Rosa chinensis uncharacterized LOC112175111	2.88057	7.39963	14.3593	co_expression
TCONS_00005450	0	0.988013	4.20068	112175649	XM_024313359.1 Rosa chinensis cytochrome P450 71A1-like	0.260033	0.538169	3.95609	co_expression
TCONS_00005450	0	0.988013	4.20068	112175702	XM_024313430.1 Rosa chinensis uncharacterized LOC112175702	1.61865	14.0676	106.959	co_expression
TCONS_00005450	0	0.988013	4.20068	112175815	XM_024313561.1 Rosa chinensis omega-hydroxypalmitate O-feruloyl transferase-like	10.6228	81.0528	265.637	co_expression
TCONS_00005450	0	0.988013	4.20068	112175918	XM_024313655.1 Rosa chinensis uncharacterized LOC112175918 partial	0.717449	3.9934	15.9992	co_expression
TCONS_00005450	0	0.988013	4.20068	112176159	XM_024313983.1 Rosa chinensis cytochrome P450 71A3-like	0	1.81307	10.1892	co_expression
TCONS_00005450	0	0.988013	4.20068	112176182	XM_024313998.1 Rosa chinensis protein NBR1 homolog	202.18	217.708	360.008	co_expression
TCONS_00005450	0	0.988013	4.20068	112176261	--	0	0.077309	0.90277	co_expression
TCONS_00005450	0	0.988013	4.20068	112176555	XM_024314540.1 Rosa chinensis pentatricopeptide repeat-containing protein At1g74750-like transcript variant X1,	3.15496	7.35983	14.8753	co_expression
TCONS_00005450	0	0.988013	4.20068	112176699	XM_024314748.1 Rosa chinensis protein CHAPERONE-LIKE PROTEIN OF POR1, chloroplastic	106.143	88.0388	36.3965	co_expression
TCONS_00005450	0	0.988013	4.20068	112176750	XM_024314808.1 Rosa chinensis vignain-like	0.953715	7.8616	478.003	co_expression
TCONS_00005450	0	0.988013	4.20068	112176846	XM_024314935.1 Rosa chinensis probable glycosyltransferase At5g03795 transcript variant X1,	5.01691	5.94273	10.579	co_expression
TCONS_00005450	0	0.988013	4.20068	112176978	XM_024315120.1 Rosa chinensis long chain acyl-CoA synthetase 4-like	117.327	177.419	305.198	co_expression
TCONS_00005450	0	0.988013	4.20068	112177008	XM_024315164.1 Rosa chinensis 7-deoxyloganetin glucosyltransferase-like	4.18088	381.569	834.186	co_expression
TCONS_00005450	0	0.988013	4.20068	112177093	--	5.04914	11.2499	19.9599	co_expression
TCONS_00005450	0	0.988013	4.20068	112177152	XM_024315371.1 Rosa chinensis eukaryotic translation initiation factor 3 subunit J-A-like transcript variant X1,	75.2086	100.067	137.939	co_expression
TCONS_00005450	0	0.988013	4.20068	112177222	XM_024315488.1 Rosa chinensis putative disease resistance protein RGA4	0.947236	2.40351	4.74728	co_expression
TCONS_00005450	0	0.988013	4.20068	112177485	XM_024315775.1 Rosa chinensis uncharacterized mitochondrial protein AtMg00810-like	0	0.0476837	0.745111	co_expression
TCONS_00005450	0	0.988013	4.20068	112177587	XM_024315871.1 Rosa chinensis 2-hydroxyisoflavanone dehydratase-like	0.034084	0.221544	6.89977	co_expression
TCONS_00005450	0	0.988013	4.20068	112178435	XM_024316582.1 Rosa chinensis transcription factor bHLH133-like transcript variant X1,	0.493759	1.35244	4.0647	co_expression
TCONS_00005450	0	0.988013	4.20068	112179259	XM_024317625.1 Rosa chinensis U-box domain-containing protein 52-like transcript variant X1,	0.0338413	4.51745	14.1972	co_expression
TCONS_00005450	0	0.988013	4.20068	112179284	XM_024317666.1 Rosa chinensis subtilisin-like protease SBT1.1	0.326142	0.172399	8.77991	co_expression
TCONS_00005450	0	0.988013	4.20068	112179671	XM_024318127.1 Rosa chinensis proline transporter 2-like transcript variant X1,	0	0	1.78665	co_expression
TCONS_00005450	0	0.988013	4.20068	112179865	XM_024318354.1 Rosa chinensis probable WRKY transcription factor 17	0.0188237	0.322828	11.6208	co_expression
TCONS_00005450	0	0.988013	4.20068	112179898	XM_024318385.1 Rosa chinensis lipid transfer-like protein VAS	32.2838	42.6114	138.53	co_expression
TCONS_00005450	0	0.988013	4.20068	112180010	XM_024318495.1 Rosa chinensis uncharacterized LOC112180010 transcript variant X1,	8.33513	24.0445	68.6928	co_expression
TCONS_00005450	0	0.988013	4.20068	112180128	--	0.0241553	2.08119	7.47223	co_expression
TCONS_00005450	0	0.988013	4.20068	112180230	XM_024318751.1 Rosa chinensis protein NRT1/ PTR FAMILY 5.10-like transcript variant X1,	0.0746987	0.051818	1.35009	co_expression
TCONS_00005450	0	0.988013	4.20068	112180252	XM_024318769.1 Rosa chinensis protein PIN-LIKES 3-like	17.1683	24.7814	99.9073	co_expression
TCONS_00005450	0	0.988013	4.20068	112180698	XM_024319262.1 Rosa chinensis probable inactive purple acid phosphatase 27	0.0232443	0.552101	6.55687	co_expression
TCONS_00005450	0	0.988013	4.20068	112180781	XM_024319344.1 Rosa chinensis uncharacterized LOC112180781	0	0.25837	1.48128	co_expression
TCONS_00005450	0	0.988013	4.20068	112181193	XM_024319642.1 Rosa chinensis uncharacterized LOC112181193 partial	0	4.95785	13.0791	co_expression
TCONS_00005450	0	0.988013	4.20068	112181660	XM_024320041.1 Rosa chinensis probable LRR receptor-like serine/threonine-protein kinase At3g47570 transcript variant X1,	0.667829	4.32838	13.8795	co_expression
TCONS_00005450	0	0.988013	4.20068	112181741	XM_024320126.1 Rosa chinensis probable polygalacturonase	0.783903	2.0947	139.708	co_expression
TCONS_00005450	0	0.988013	4.20068	112181971	XM_024320382.1 Rosa chinensis uncharacterized LOC112181971	6.49823	23.9366	43.1626	co_expression
TCONS_00005450	0	0.988013	4.20068	112181995	XM_024320419.1 Rosa chinensis probable E3 ubiquitin-protein ligase RHB1A transcript variant X1,	1.59483	3.20422	16.2081	co_expression
TCONS_00005450	0	0.988013	4.20068	112182026	XM_024320456.1 Rosa chinensis uncharacterized LOC112182026	0.258536	0.419757	1.95874	co_expression
TCONS_00005450	0	0.988013	4.20068	112182118	XM_024320559.1 Rosa chinensis GRF1-interacting factor 3 transcript variant X1,	6.03743	6.91822	14.0605	co_expression
TCONS_00005450	0	0.988013	4.20068	112182358	XM_024320842.1 Rosa chinensis pumilio homolog 4	9.80096	20.5194	51.4351	co_expression
TCONS_00005450	0	0.988013	4.20068	112182586	XM_024321089.1 Rosa chinensis probable disease resistance protein At4g27220	0.198968	0.682326	1.82207	co_expression
TCONS_00005450	0	0.988013	4.20068	112182823	XM_024321370.1 Rosa chinensis ATP-dependent Clp protease ATP-binding subunit CLPT1, chloroplastic-like	23.3543	18.0513	7.26483	co_expression
TCONS_00005450	0	0.988013	4.20068	112182996	XM_024321585.1 Rosa chinensis N-(5'-phosphoribosyl)anthranilate isomerase 1, chloroplastic-like	6.70701	12.5281	24.4577	co_expression
TCONS_00005450	0	0.988013	4.20068	112183353	XM_024321707.1 Rosa chinensis cysteine-rich receptor-like protein kinase 10	0.890353	1.7812	6.86184	co_expression
TCONS_00005450	0	0.988013	4.20068	112183685	XM_024322041.1 Rosa chinensis protein FAR1-RELATED SEQUENCE 5-like	0.0128743	0.037181	0.555604	co_expression
TCONS_00005450	0	0.988013	4.20068	112184297	XM_024322564.1 Rosa chinensis pyridoxal reductase, chloroplastic	0.752832	3.27011	24.889	co_expression
TCONS_00005450	0	0.988013	4.20068	112184490	XM_024322752.1 Rosa chinensis VQ motif-containing protein 11	0.868143	6.03458	22.7216	co_expression
TCONS_00005450	0	0.988013	4.20068	112184521	XM_024322790.1 Rosa chinensis uncharacterized LOC112184521	0.735545	6.59783	30.0006	co_expression
TCONS_00005450	0	0.988013	4.20068	112184829	XM_024323066.1 Rosa chinensis L-type lectin-domain containing receptor kinase VIII.1-like	0.473616	0.892311	6.88104	co_expression
TCONS_00005450	0	0.988013	4.20068	112184912	XM_024323144.1 Rosa chinensis UPF0481 protein At3g47200-like	9.02657	33.8036	62.5816	co_expression
TCONS_00005450	0	0.988013	4.20068	112185043	XM_024323253.1 Rosa chinensis protein NRT1/ PTR FAMILY 4.3-like	0	0	0.630965	co_expression
TCONS_00005450	0	0.988013	4.20068	112185394	XM_024323637.1 Rosa chinensis ER lumen protein-retaining receptor-like	11.1189	16.1412	49.402	co_expression
TCONS_00005450	0	0.988013	4.20068	112185407	XM_024323654.1 Rosa chinensis laccase-15-like	0.609156	29.5432	416.125	co_expression
TCONS_00005450	0	0.988013	4.20068	112185533	XM_024323797.1 Rosa chinensis aspartyl protease family protein 1-like	3.79055	10.8641	37.1555	co_expression
TCONS_00005450	0	0.988013	4.20068	112185593	XM_024323855.1 Rosa chinensis uncharacterized LOC112185593	0.45877	0.905194	2.63266	co_expression
TCONS_00005450	0	0.988013	4.20068	112185681	XM_024323958.1 Rosa chinensis stress-related protein-like	1.77125	8.22244	101.565	co_expression
TCONS_00005450	0	0.988013	4.20068	112185745	XM_024324058.1 Rosa chinensis NADPH-dependent oxidoreductase 2-alkenal reductase-like	16.6005	31.9532	73.8142	co_expression
TCONS_00005450	0	0.988013	4.20068	112185853	XM_024324178.1 Rosa chinensis WAT1-related protein At3g28050-like	1.89332	6.84551	39.9401	co_expression
TCONS_00005450	0	0.988013	4.20068	112185980	XM_024324328.1 Rosa chinensis receptor-like protein kinase HSL1	2.93526	14.605	51.8761	co_expression
TCONS_00005450	0	0.988013	4.20068	112186441	XM_024324871.1 Rosa chinensis plastidic ATP/ADP-transporter	73.2236	74.8221	161.244	co_expression
TCONS_00005450	0	0.988013	4.20068	112186796	XM_024325310.1 Rosa chinensis adenine nucleotide transporter BT1, chloroplastic/mitochondrial-like	0.0127487	0.176162	1.82277	co_expression
TCONS_00005450	0	0.988013	4.20068	112186804	XM_024325325.1 Rosa chinensis laccase-15-like	0.016273	2.6329	7.36679	co_expression
TCONS_00005450	0	0.988013	4.20068	112186817	XM_024325348.1 Rosa chinensis auxin-responsive protein IAA26-like	1.32597	2.20234	14.8564	co_expression
TCONS_00005450	0	0.988013	4.20068	112187322	XM_024326071.1 Rosa chinensis calcineurin B-like protein 10 transcript variant X1,	1.25142	5.5137	11.7556	co_expression
TCONS_00005450	0	0.988013	4.20068	112187328	XM_024326081.1 Rosa chinensis formin-like protein 13	0	0.0163023	0.237889	co_expression
TCONS_00005450	0	0.988013	4.20068	112187335	XM_024326088.1 Rosa chinensis bifunctional riboflavin kinase/FMN phosphatase-like	6.31974	4.92042	1.48946	co_expression
TCONS_00005450	0	0.988013	4.20068	112187476	XM_024326281.1 Rosa chinensis WAT1-related protein At5g40240-like transcript variant X1,	0.242782	1.21406	6.69027	co_expression
TCONS_00005450	0	0.988013	4.20068	112187549	XM_024326396.1 Rosa chinensis class V chitinase-like	0.0270643	2.49625	11.5955	co_expression
TCONS_00005450	0	0.988013	4.20068	112187565	XM_024326416.1 Rosa chinensis protein MKS1	1.64018	3.25157	7.30157	co_expression
TCONS_00005450	0	0.988013	4.20068	112187659	XM_024326541.1 Rosa chinensis B-box zinc finger protein 32-like	0.0350837	0.202151	5.86597	co_expression
TCONS_00005450	0	0.988013	4.20068	112187805	XM_024326751.1 Rosa chinensis aldehyde dehydrogenase family 7 member A1	112.69	182.24	277.584	co_expression
TCONS_00005450	0	0.988013	4.20068	112187919	XM_024326885.1 Rosa chinensis shikimate O-hydroxycinnamoyltransferase-like transcript variant X1,	0.714863	9.07856	26.8652	co_expression
TCONS_00005450	0	0.988013	4.20068	112187979	XM_024326963.1 Rosa chinensis transcription factor ICE1-like	0	0	0.123462	co_expression
TCONS_00005450	0	0.988013	4.20068	112188045	XM_024327062.1 Rosa chinensis cysteine-rich receptor-like protein kinase 7 transcript variant X1,	0.0973013	0.820322	9.20296	co_expression
TCONS_00005450	0	0.988013	4.20068	112188055	XM_024327073.1 Rosa chinensis cysteine-rich receptor-like protein kinase 7 transcript variant X1,	0.08403	2.45127	10.1245	co_expression
TCONS_00005450	0	0.988013	4.20068	112188085	XM_024327108.1 Rosa chinensis aspartic proteinase A1-like	73.1509	83.6827	129.592	co_expression
TCONS_00005450	0	0.988013	4.20068	112188154	XM_024327202.1 Rosa chinensis uncharacterized LOC112188154	0.469275	1.34941	4.70105	co_expression
TCONS_00005450	0	0.988013	4.20068	112188180	XM_024327246.1 Rosa chinensis ras-related protein Rab11D	10.2077	16.2614	28.2538	co_expression
TCONS_00005450	0	0.988013	4.20068	112188329	XM_024327421.1 Rosa chinensis cellulose synthase-like protein H1	0.310821	1.66824	12.1416	co_expression
TCONS_00005450	0	0.988013	4.20068	112188584	XM_024327729.1 Rosa chinensis uncharacterized LOC112188584	0.243523	0.339154	2.92204	co_expression
TCONS_00005450	0	0.988013	4.20068	112188587	XM_024327734.1 Rosa chinensis beta-galactosidase-like	5.77154	55.1898	663.254	co_expression
TCONS_00005450	0	0.988013	4.20068	112188736	XM_024327912.1 Rosa chinensis cysteine-rich receptor-like protein kinase 10	0.61502	27.6127	106.304	co_expression
TCONS_00005450	0	0.988013	4.20068	112188961	XM_024328198.1 Rosa chinensis senescence/dehydration-associated protein At4g35985, chloroplastic-like transcript variant X1,	5.28843	35.6811	99.8432	co_expression
TCONS_00005450	0	0.988013	4.20068	112189169	XM_024328436.1 Rosa chinensis BTB/POZ domain-containing protein SR1IP1 transcript variant X1,	6.74541	12.0987	51.904	co_expression
TCONS_00005450	0	0.988013	4.20068	112189298	XM_024328603.1 Rosa chinensis 2-alkenal reductase (NADP(+)-dependent)-like	44.0317	88.5793	244.685	co_expression
TCONS_00005450	0	0.988013	4.20068	112189640	XM_024328987.1 Rosa chinensis temperature-induced lipocalin-1	45.1003	214.375	688.478	co_expression
TCONS_00005450	0	0.988013	4.20068	112189945	XM_024329343.1 Rosa chinensis putative chloride channel-like protein CLC-g	11.2726	14.3017	29.3503	co_expression
TCONS_00005450	0	0.988013	4.20068	112189957	XM_024329362.1 Rosa chinensis ribulose bisphosphate carboxylase small chain, chloroplastic-like	9.7894	351.037	850.98	co_expression
TCONS_00005450	0	0.988013	4.20068	112190287	XM_024329714.1 Rosa chinensis uncharacterized LOC112190287 transcript variant X1,	2.32364	69.5753	193.295	co_expression
TCONS_00005450	0	0.988013	4.20068	112190364	XM_024329798.1 Rosa chinensis uncharacterized LOC112190364	35.9969	58.1671	104.884	co_expression
TCONS_00005450	0	0.988013	4.20068	112190381	XM_024329818.1 Rosa chinensis NEP1-interacting protein 1-like	14.5584	35.1982	117.977	co_expression
TCONS_00005450	0	0.988013	4.20068	112190504	XM_024329939.1 Rosa chinensis mitochondrial import inner membrane translocase subunit TIM17-2-like	0	0.045093	0.30675	co_expression
TCONS_00005450	0	0.988013	4.20068	112190521	XM_024329956.1 Rosa chinensis 2-alkenal reductase (NADP(+)-dependent)-like	3.07079	3.26946	17.065	co_expression
TCONS_00005450	0	0.988013	4.20068	112190687	XM_024330155.1 Rosa chinensis salicylate carboxymethyltransferase	15.8527	540.621	1393.67	co_expression
TCONS_00005450	0	0.988013	4.20068	112190726	XM_024330200.1 Rosa chinensis F-box/kelch-repeat protein At3g23880-like	1.59768	1.79619	2.90092	co_expression
TCONS_00005450	0	0.988013	4.20068	112190924	XM_024330439.1 Rosa chinensis probable serine incorporator transcript variant X1,	0.575027	1.09834	14.7256	co_expression
TCONS_00005450	0	0.988013	4.20068	112191523	XM_024330885.1 Rosa chinensis macrophage migration inhibitory factor homolog	13.6385	16.055	33.9045	co_expression
TCONS_00005450	0	0.988013	4.20068	112191653	XM_024331035.1 Rosa chinensis alpha-L-arabinofuranosidase 1	50.4439	100.815	357.803	co_expression
TCONS_00005450	0	0.988013	4.20068	112192552	XM_024332342.1 Rosa chinensis aspartic proteinase-like transcript variant X1,	1.58742	6.47081	54.6029	co_expression
TCONS_00005450	0	0.988013	4.20068	112192686	XM_024332538.1 Rosa chinensis pentatricopeptide repeat-containing protein At3g09650, chloroplastic	2.2349	8.57021	20.9778	co_expression
TCONS_00005450	0	0.988013	4.20068	112192763	XM_024332631.1 Rosa chinensis purple acid phosphatase 22-like	0.20151	0.076224	10.6898	co_expression
TCONS_00005450	0	0.988013	4.20068	112192933	XM_024332875.1 Rosa chinensis dnaJ homolog subfamily C member 28	0.472428	2.15495	4.40941	co_expression
TCONS_00005450	0	0.988013	4.20068	112193023	XM_024333028.1 Rosa chinensis transcription factor RAX2	0	0.011513	0.266845	co_expression
TCONS_00005450	0	0.988013	4.20068	112193148	XM_024333200.1 Rosa chinensis aspartic proteinase PCS1-like	0.8963	8.4857	32.9343	co_expression
TCONS_00005450	0	0.988013	4.20068	112193197	XM_024333268.1 Rosa chinensis remorin 4.1-like transcript variant X1,	1.36576	3.2165	14.6787	co_expression
TCONS_00005450	0	0.988013	4.20068	112193311	XM_024333396.1 Rosa chinensis meiosis-specific protein ASY3	0.132266	0.197271	0.733573	co_expression
TCONS_00005450	0	0.988013	4.20068	112193387	XM_024333529.1 Rosa chinensis protoporphyrinogen oxidase 1, chloroplastic	76.6558	57.5685	19.1923	co_expression
TCONS_00005450	0	0.988013	4.20068	112193492	XM_024333663.1 Rosa chinensis probable E3 ubiquitin-protein ligase ARI8	31.8178	34.8561	45.6792	co_expression
TCONS_00005450	0	0.988013	4.20068	112194019	XM_024334284.1 Rosa chinensis uncharacterized LOC112194019	0.480063	0.680279	1.43189	co_expression
TCONS_00005450	0	0.988013	4.20068	112194322	XM_024334573.1 Rosa chinensis WAS/WASL-interacting protein family member 3-like	0	0.363619	2.34675	co_expression
TCONS_00005450	0	0.988013	4.20068	112194505	--	0.213255	5.81923	28.5562	co_expression
TCONS_00005450	0	0.988013	4.20068	112194600	--	0.206096	1.85577	16.3416	co_expression
TCONS_00005450	0	0.988013	4.20068	112194603	XM_024334821.1 Rosa chinensis uncharacterized LOC112194603	0.174447	0.61954	1.67489	co_expression
TCONS_00005450	0	0.988013	4.20068	112194767	--	0.0597067	0.300357	3.75091	co_expression
TCONS_00005450	0	0.988013	4.20068	112194868	XM_024335113.1 Rosa chinensis uncharacterized LOC112194868	0.307423	0.542603	1.45584	co_expression
TCONS_00005450	0	0.988013	4.20068	112194901	XM_024335152.1 Rosa chinensis protein NRT1/ PTR FAMILY 4.5-like	0.0340727	3.5874	9.31299	co_expression
TCONS_00005450	0	0.988013	4.20068	112194917	XM_024335169.1 Rosa chinensis non-structural maintenance of chromosomes element 4 homolog A-like	0.0165273	0.0166407	0.496665	co_expression
TCONS_00005450	0	0.988013	4.20068	112195331	XM_024335747.1 Rosa chinensis DNA-directed RNA polymerase III subunit 1-like	0.155435	0.199854	0.875864	co_expression
TCONS_00005450	0	0.988013	4.20068	112195784	XM_024335981.1 Rosa chinensis uncharacterized LOC112195784 transcript variant X1,	4.71714	5.68292	46.391	co_expression
TCONS_00005450	0	0.988013	4.20068	112195822	XM_024336033.1 Rosa chinensis uncharacterized LOC112195822 transcript variant X1,	3.63008	12.6089	34.9484	co_expression
TCONS_00005450	0	0.988013	4.20068	112195950	XM_024336188.1 Rosa chinensis CASP-like protein 1E1	0.897932	90.84	256.529	co_expression
TCONS_00005450	0	0.988013	4.20068	112195999	XM_024336253.1 Rosa chinensis F-box protein SKIP22-like	0	0.241925	1.05893	co_expression
TCONS_00005450	0	0.988013	4.20068	112196018	XM_024336276.1 Rosa chinensis E3 ubiquitin-protein ligase AIRP2-like	8.6516	15.9557	28.8033	co_expression
TCONS_00005450	0	0.988013	4.20068	112196065	XM_024336347.1 Rosa chinensis protein SUPPRESSOR OF MAX2 1	8.63559	8.56876	24.1208	co_expression
TCONS_00005450	0	0.988013	4.20068	112196066	XM_024336348.1 Rosa chinensis uncharacterized LOC112196066	0.074472	0.423984	9.88762	co_expression
TCONS_00005450	0	0.988013	4.20068	112196073	XM_024336361.1 Rosa chinensis high mobility group B protein 15 transcript variant X1,	0	0.0359267	0.356579	co_expression
TCONS_00005450	0	0.988013	4.20068	112196223	XM_024336534.1 Rosa chinensis uncharacterized LOC112196223	0.071885	0.203934	9.56185	co_expression
TCONS_00005450	0	0.988013	4.20068	112196371	XM_024336694.1 Rosa chinensis uncharacterized LOC112196371 transcript variant X1,	38.5422	52.564	72.0274	co_expression
TCONS_00005450	0	0.988013	4.20068	112196761	XM_024337183.1 Rosa chinensis protein IQ-DOMAIN 14	68.7837	90.0203	135.509	co_expression
TCONS_00005450	0	0.988013	4.20068	112196777	XM_024337206.1 Rosa chinensis G-type lectin S-receptor-like serine/threonine-protein kinase At1g61500 transcript variant X1,	0.017069	0.077005	0.594488	co_expression
TCONS_00005450	0	0.988013	4.20068	112196824	XM_024337288.1 Rosa chinensis purple acid phosphatase 4-like	10.0411	46.2949	208.795	co_expression
TCONS_00005450	0	0.988013	4.20068	112196917	XM_024337397.1 Rosa chinensis ABC transporter B family member 26, chloroplastic transcript variant X1,	3.62163	7.27393	14.5898	co_expression
TCONS_00005450	0	0.988013	4.20068	112196967	XM_024337473.1 Rosa chinensis 21 kDa protein-like	0.0206307	0.247668	1.07855	co_expression
TCONS_00005450	0	0.988013	4.20068	112196972	XM_024337476.1 Rosa chinensis endochitinase EP3-like	2.32342	79.7464	384.526	co_expression
TCONS_00005450	0	0.988013	4.20068	112196973	XM_024337477.1 Rosa chinensis endochitinase EP3-like	0.817167	43.7448	413.757	co_expression
TCONS_00005450	0	0.988013	4.20068	112197127	XM_024337700.1 Rosa chinensis transcription factor TGA2.2-like	0.0103167	0.301657	1.78792	co_expression
TCONS_00005450	0	0.988013	4.20068	112197483	XM_024338183.1 Rosa chinensis protein FLX-like 3 transcript variant X1,	5.31001	6.48445	10.0749	co_expression
TCONS_00005450	0	0.988013	4.20068	112197658	--	0.129935	2.03015	14.8391	co_expression
TCONS_00005450	0	0.988013	4.20068	112197670	XM_024338435.1 Rosa chinensis probable xyloglucan endotransglucosylase/hydrolase protein 23	0.357676	16.016	165.172	co_expression
TCONS_00005450	0	0.988013	4.20068	112197736	XM_024338545.1 Rosa chinensis anthocyanidin 3-O-glucosyltransferase 7-like	0.0773243	0.166392	0.73409	co_expression
TCONS_00005450	0	0.988013	4.20068	112198251	XM_024339337.1 Rosa chinensis uncharacterized LOC112198251	38.2319	50.9051	97.5128	co_expression
TCONS_00005450	0	0.988013	4.20068	112198283	XM_024339380.1 Rosa chinensis calcium-transporting ATPase 10, plasma membrane-type-like transcript variant X1,	67.2786	109.6	235.037	co_expression
TCONS_00005450	0	0.988013	4.20068	112198330	XM_024339428.1 Rosa chinensis tetraspanin-8-like	61.0762	93.8476	173.86	co_expression
TCONS_00005450	0	0.988013	4.20068	112198361	XM_024339470.1 Rosa chinensis large ribosomal RNA subunit accumulation protein YCED homolog 2, chloroplastic	0.183413	2.1084	8.00129	co_expression
TCONS_00005450	0	0.988013	4.20068	112198363	XM_024339472.1 Rosa chinensis GATA transcription factor 15-like	1.94289	2.65031	8.22049	co_expression
TCONS_00005450	0	0.988013	4.20068	112198377	XM_024339489.1 Rosa chinensis ubiquinol oxidase, mitochondrial-like	27.4261	41.0836	84.7481	co_expression
TCONS_00005450	0	0.988013	4.20068	112198645	XM_024339783.1 Rosa chinensis uncharacterized LOC112198645	0.42195	0.908797	3.35349	co_expression
TCONS_00005450	0	0.988013	4.20068	112199188	XM_024340238.1 Rosa chinensis protein ALP1-like	0.00797467	0.0648467	0.775805	co_expression
TCONS_00005450	0	0.988013	4.20068	112200007	XM_024341002.1 Rosa chinensis uncharacterized LOC112200007	1.23411	3.77592	16.735	co_expression
TCONS_00005450	0	0.988013	4.20068	112200040	XM_024341072.1 Rosa chinensis probable LRR receptor-like serine/threonine-protein kinase At3g47570	0	0.0919143	0.476426	co_expression
TCONS_00005450	0	0.988013	4.20068	112200084	XM_024341098.1 Rosa chinensis transcription factor MYB108	0.938837	5.38494	77.0887	co_expression
TCONS_00005450	0	0.988013	4.20068	112200227	XM_024341249.1 Rosa chinensis heavy metal-associated isoprenylated plant protein 20-like	0	4.63465	48.9973	co_expression
TCONS_00005450	0	0.988013	4.20068	112200732	XM_024341738.1 Rosa chinensis palmitoyl-monogalactosyldiacylglycerol delta-7 desaturase, chloroplastic-like	0	5.82189	37.1982	co_expression
TCONS_00005450	0	0.988013	4.20068	112200763	XM_024341772.1 Rosa chinensis inactive beta-amylase 9	43.7166	292.961	775.858	co_expression
TCONS_00005450	0	0.988013	4.20068	112201076	XM_024342091.1 Rosa chinensis probable receptor-like protein kinase At5g24010	0.144621	0.468808	1.42002	co_expression
TCONS_00005450	0	0.988013	4.20068	112201420	XM_024342297.1 Rosa chinensis uncharacterized LOC112201420	0.0572917	5.18052	20.1167	co_expression
TCONS_00005450	0	0.988013	4.20068	112201639	XM_024342542.1 Rosa chinensis formin-binding protein 4 transcript variant X1,	7.25184	7.93144	10.9573	co_expression
TCONS_00005450	0	0.988013	4.20068	112201860	XM_024342782.1 Rosa chinensis membrane-associated 30 kDa protein, chloroplastic-like	0	0.447169	1.12538	co_expression
TCONS_00005450	0	0.988013	4.20068	112201944	--	0.00948967	0.0183493	1.75706	co_expression
TCONS_00005450	0	0.988013	4.20068	112202042	XM_024342948.1 Rosa chinensis protein DMP6-like	2.45268	3.02693	62.7656	co_expression
TCONS_00005450	0	0.988013	4.20068	112202321	XM_024343275.1 Rosa chinensis receptor-like protein EIX2	0.525907	0.947833	4.13125	co_expression
TCONS_00005450	0	0.988013	4.20068	112202362	XM_024343349.1 Rosa chinensis early nodulin-like protein 2	82.2752	299.47	826.984	co_expression
TCONS_00005450	0	0.988013	4.20068	112202737	XM_024343744.1 Rosa chinensis receptor-like protein EIX2 transcript variant X1,	0.438116	0.772024	1.91046	co_expression
TCONS_00005450	0	0.988013	4.20068	112202987	XM_024344020.1 Rosa chinensis uncharacterized LOC112202987	0.251818	1.40318	10.3368	co_expression
TCONS_00005450	0	0.988013	4.20068	112203030	XM_024344060.1 Rosa chinensis olee1-like protein	0	0	0.347689	co_expression
TCONS_00005450	0	0.988013	4.20068	112203296	XM_024344287.1 Rosa chinensis receptor-like protein EIX2	0.0587213	0.198132	0.6081	co_expression
TCONS_00005450	0	0.988013	4.20068	112203916	XM_024344813.1 Rosa chinensis cationic amino acid transporter 5 transcript variant X1,	0.121295	9.88265	26.1936	co_expression
TCONS_00005450	0	0.988013	4.20068	XLOC_026914	--	0.017396	0.444332	1.51873	co_expression
TCONS_00005666	0	0.042243	1.19267	112163899	XM_024300162.1 Rosa chinensis pentatricopeptide repeat-containing protein At1g63400-like	0	0	0.127387	co_expression
TCONS_00005666	0	0.042243	1.19267	112163923	XM_024300204.1 Rosa chinensis cyclic nucleotide-gated ion channel 1-like transcript variant X1,	0.017353	0	0.109707	co_expression
TCONS_00005666	0	0.042243	1.19267	112164068	XM_024300308.1 Rosa chinensis uncharacterized protein YpeP-like	0.000107	0	0.0124023	co_expression
TCONS_00005666	0	0.042243	1.19267	112164081	XM_024300321.1 Rosa chinensis F-box/LRR-repeat protein At3g26922-like	0	0	0.062709	co_expression
TCONS_00005666	0	0.042243	1.19267	112164362	XM_024300589.1 Rosa chinensis G-type lectin S-receptor-like serine/threonine-protein kinase SD1-29	0	0	0.125373	co_expression
TCONS_00005666	0	0.042243	1.19267	112164421	XM_024300614.1 Rosa chinensis receptor-like protein 2	0	0	0.0270233	co_expression
TCONS_00005666	0	0.042243	1.19267	112164553	XM_024300778.1 Rosa chinensis (R)-mandelonitrile lyase-like transcript variant X1,	0.0126883	0.0403277	0.941457	co_expression
TCONS_00005666	0	0.042243	1.19267	112164590	XM_024300829.1 Rosa chinensis wall-associated receptor kinase 1-like	0.0226903	0.008541	0.185273	co_expression
TCONS_00005666	0	0.042243	1.19267	112164636	XM_024300903.1 Rosa chinensis cytochrome P450 CYP82D47-like	0	0	0.0832033	co_expression
TCONS_00005666	0	0.042243	1.19267	112164700	XM_024300996.1 Rosa chinensis uncharacterized LOC112164700	0.0823407	0.0468813	1.27696	co_expression
TCONS_00005666	0	0.042243	1.19267	112164787	XM_024301097.1 Rosa chinensis polyphenol oxidase, chloroplastic-like	0.0495457	0.139934	4.50336	co_expression
TCONS_00005666	0	0.042243	1.19267	112165215	XM_024301667.1 Rosa chinensis uncharacterized LOC112165215	0	0	0.255591	co_expression
TCONS_00005666	0	0.042243	1.19267	112165784	XM_024302431.1 Rosa chinensis trans-resveratrol di-O-methyltransferase-like	0.403303	0.253629	2.44368	co_expression
TCONS_00005666	0	0.042243	1.19267	112165825	XM_024302495.1 Rosa chinensis berberine bridge enzyme-like 17	0	0.0322813	5.13248	co_expression
TCONS_00005666	0	0.042243	1.19267	112165832	XM_024302515.1 Rosa chinensis pathogenesis-related genes transcriptional activator PTI5-like	0.190562	0.178666	2.95841	co_expression
TCONS_00005666	0	0.042243	1.19267	112165898	XM_024302601.1 Rosa chinensis rust resistance kinase Lr10-like	0	0.0735713	0.724567	co_expression
TCONS_00005666	0	0.042243	1.19267	112166024	XM_024302775.1 Rosa chinensis uncharacterized LOC112166024	0.132717	0.367602	2.54424	co_expression
TCONS_00005666	0	0.042243	1.19267	112166039	XM_024302790.1 Rosa chinensis scarecrow-like protein 30	0	0.0169603	0.20032	co_expression
TCONS_00005666	0	0.042243	1.19267	112166271	XM_024303067.1 Rosa chinensis cysteine-rich receptor-like protein kinase 10	0	0.0440927	0.165411	co_expression
TCONS_00005666	0	0.042243	1.19267	112166319	XM_024303135.1 Rosa chinensis probable WRKY transcription factor 71	0.0370123	0.075632	7.51642	co_expression
TCONS_00005666	0	0.042243	1.19267	112166361	XM_024303191.1 Rosa chinensis PRA1 family protein F2-like	0.28866	0.0629537	1.18951	co_expression
TCONS_00005666	0	0.042243	1.19267	112166425	XM_024303264.1 Rosa chinensis heat stress transcription factor B-2a-like	0.0215777	0	0.162202	co_expression
TCONS_00005666	0	0.042243	1.19267	112166444	XM_024303288.1 Rosa chinensis stigma-specific STIG1-like protein 1	0	0	0.579043	co_expression
TCONS_00005666	0	0.042243	1.19267	112166502	XM_024303366.1 Rosa chinensis glutamate receptor 2.7-like	0.0705097	0.209812	2.21994	co_expression
TCONS_00005666	0	0.042243	1.19267	112166563	XM_024303438.1 Rosa chinensis protein UPSTREAM OF FLC transcript variant X1,	1.24107	1.17058	12.6192	co_expression
TCONS_00005666	0	0.042243	1.19267	112166564	XM_024303439.1 Rosa chinensis gibberellin 2-beta-dioxygenase-like	0	0	0.197512	co_expression
TCONS_00005666	0	0.042243	1.19267	112167609	XM_024304653.1 Rosa chinensis receptor-like protein EIX2	0	0	0.029038	co_expression
TCONS_00005666	0	0.042243	1.19267	112167644	XM_024304690.1 Rosa chinensis 60S acidic ribosomal protein P2-like	0.277434	0.055482	3.35097	co_expression
TCONS_00005666	0	0.042243	1.19267	112167942	--	0	0.0385287	0.113245	co_expression
TCONS_00005666	0	0.042243	1.19267	112168054	XM_024305168.1 Rosa chinensis AT-hook motif nuclear-localized protein 15-like	0.00759633	0.0136877	0.527564	co_expression
TCONS_00005666	0	0.042243	1.19267	112168920	XM_024305853.1 Rosa chinensis potassium channel KAT3	0	0	0.0334713	co_expression
TCONS_00005666	0	0.042243	1.19267	112169397	XM_024306420.1 Rosa chinensis glutamate receptor 2.8-like	0	0.0608313	0.250641	co_expression
TCONS_00005666	0	0.042243	1.19267	112170041	XM_024307188.1 Rosa chinensis UDP-glucose flavonoid 3-O-glucosyltransferase 7-like	0	0.177241	7.8186	co_expression
TCONS_00005666	0	0.042243	1.19267	112170317	XM_024307567.1 Rosa chinensis probable glutathione S-transferase	0	0.0500517	0.794433	co_expression
TCONS_00005666	0	0.042243	1.19267	112170490	--	0	0	0.153802	co_expression
TCONS_00005666	0	0.042243	1.19267	112170527	XM_024307853.1 Rosa chinensis esterase-like	0.209544	0.175992	3.63468	co_expression
TCONS_00005666	0	0.042243	1.19267	112171258	XM_024308471.1 Rosa chinensis putative cysteine-rich repeat secretory protein 21	0.0132247	0	0.297673	co_expression
TCONS_00005666	0	0.042243	1.19267	112171730	XM_024308869.1 Rosa chinensis peroxiredoxin-2E-1, chloroplastic-like	0.024848	0.0216403	0.495825	co_expression
TCONS_00005666	0	0.042243	1.19267	112171781	XM_024308911.1 Rosa chinensis uncharacterized LOC112171781	0	0	0.028478	co_expression
TCONS_00005666	0	0.042243	1.19267	112171801	XM_024308923.1 Rosa chinensis glycine-rich cell wall structural protein 1.8-like	0	0	0.157994	co_expression
TCONS_00005666	0	0.042243	1.19267	112171811	--	0	0	0.153798	co_expression
TCONS_00005666	0	0.042243	1.19267	112171997	XM_024309156.1 Rosa chinensis crocetin glucosyltransferase, chloroplastic-like	0.105177	0.113462	1.13212	co_expression
TCONS_00005666	0	0.042243	1.19267	112172008	XM_024309165.1 Rosa chinensis uncharacterized LOC112172008	0	0	0.383668	co_expression
TCONS_00005666	0	0.042243	1.19267	112172186	XM_024309429.1 Rosa chinensis protein NUCLEAR FUSION DEFECTIVE 4-like	0.630937	0.487573	3.21661	co_expression
TCONS_00005666	0	0.042243	1.19267	112172295	XM_024309577.1 Rosa chinensis probable protein phosphatase 2C 32 transcript variant X1,	0.156616	0.0992517	0.936724	co_expression
TCONS_00005666	0	0.042243	1.19267	112172307	XM_024309594.1 Rosa chinensis protein RALF-like 33	0.195869	0.528041	22.8367	co_expression
TCONS_00005666	0	0.042243	1.19267	112172360	XM_024309664.1 Rosa chinensis putative receptor-like protein kinase At4g00960 transcript variant X1,	0.2276	0.0987857	0.856235	co_expression
TCONS_00005666	0	0.042243	1.19267	112172494	XM_024309859.1 Rosa chinensis GABA transporter 1-like transcript variant X1,	0	0.0109403	0.674009	co_expression
TCONS_00005666	0	0.042243	1.19267	112172522	XM_024309904.1 Rosa chinensis UPF0481 protein At3g47200-like	0.00988833	0.0939397	1.23946	co_expression
TCONS_00005666	0	0.042243	1.19267	112172564	XM_024309955.1 Rosa chinensis pathogen-related protein-like	0.11878	0.068081	1.59957	co_expression
TCONS_00005666	0	0.042243	1.19267	112172633	XM_024310035.1 Rosa chinensis cytochrome P450 94A1-like	0.5914	0.202852	3.56382	co_expression
TCONS_00005666	0	0.042243	1.19267	112172660	XM_024310096.1 Rosa chinensis uncharacterized LOC112172660	0.482919	1.98145	34.953	co_expression
TCONS_00005666	0	0.042243	1.19267	112172703	XM_024310159.1 Rosa chinensis uncharacterized LOC112172703	0.685094	0.888388	12.2359	co_expression
TCONS_00005666	0	0.042243	1.19267	112172747	XM_024310217.1 Rosa chinensis non-functional pseudokinase ZED1-like	0.114535	0.190875	0.88287	co_expression
TCONS_00005666	0	0.042243	1.19267	112172761	XM_024310231.1 Rosa chinensis protein MKS1-like	0	0.0163883	0.252874	co_expression
TCONS_00005666	0	0.042243	1.19267	112172801	XM_024310288.1 Rosa chinensis uncharacterized LOC112172801	0.0200033	0	0.11873	co_expression
TCONS_00005666	0	0.042243	1.19267	112172885	XM_024310382.1 Rosa chinensis endochitinase 2-like	0.259326	0.117836	16.0125	co_expression
TCONS_00005666	0	0.042243	1.19267	112172915	XM_024310417.1 Rosa chinensis chloroplast envelope quinone oxidoreductase homolog	0.0645143	0.113573	2.49016	co_expression
TCONS_00005666	0	0.042243	1.19267	112172957	XM_024310480.1 Rosa chinensis cysteine-rich repeat secretory protein 55-like	0.0516167	0.102668	2.08633	co_expression
TCONS_00005666	0	0.042243	1.19267	112173251	XM_024310843.1 Rosa chinensis F-box/kelch-repeat protein At3g23880-like	0.118823	0.225602	7.59118	co_expression
TCONS_00005666	0	0.042243	1.19267	112173356	XM_024310969.1 Rosa chinensis monooxygenase 2-like transcript variant X1,	0.0167947	0.00869033	0.159353	co_expression
TCONS_00005666	0	0.042243	1.19267	112173357	XM_024310971.1 Rosa chinensis monooxygenase 3-like	0	0.0256043	0.121543	co_expression
TCONS_00005666	0	0.042243	1.19267	112173431	XM_024311051.1 Rosa chinensis squalene monooxygenase-like	0.222111	0.149557	0.981698	co_expression
TCONS_00005666	0	0.042243	1.19267	112173443	XM_024311066.1 Rosa chinensis uncharacterized LOC112173443 transcript variant X1,	0	0	0.319311	co_expression
TCONS_00005666	0	0.042243	1.19267	112173674	XM_024311355.1 Rosa chinensis F-box/LRR-repeat protein 17	0.0175183	0	0.0953343	co_expression
TCONS_00005666	0	0.042243	1.19267	112173739	XM_024311422.1 Rosa chinensis uncharacterized LOC112173739	0	0	0.3199	co_expression
TCONS_00005666	0	0.042243	1.19267	112173902	XM_024311595.1 Rosa chinensis UPF0496 protein At4g34320-like	0	0	0.136866	co_expression
TCONS_00005666	0	0.042243	1.19267	112173943	XM_024311634.1 Rosa chinensis abscisic acid receptor PYL2-like	0.00969667	0.0188747	2.14593	co_expression
TCONS_00005666	0	0.042243	1.19267	112174045	XM_024311747.1 Rosa chinensis probable pectinesterase/pectinesterase inhibitor 41	1.27033	4.32882	56.8106	co_expression
TCONS_00005666	0	0.042243	1.19267	112174157	XM_024311884.1 Rosa chinensis probable glutathione S-transferase transcript variant X1,	0	0.017065	1.08652	co_expression
TCONS_00005666	0	0.042243	1.19267	112174250	XM_024311985.1 Rosa chinensis 5'-methylthioadenosine/S-adenosylhomocysteine nucleosidase-like	0.014304	0	0.0905203	co_expression
TCONS_00005666	0	0.042243	1.19267	112174407	XM_024312178.1 Rosa chinensis GDSL esterase/lipase At4g10955-like	0.070861	0.0548913	0.423636	co_expression
TCONS_00005666	0	0.042243	1.19267	112174435	XM_024312202.1 Rosa chinensis tuberculostearic acid methyltransferase UfaA1-like	0	0	0.217793	co_expression
TCONS_00005666	0	0.042243	1.19267	112174657	XM_024312456.1 Rosa chinensis calmodulin-like protein 8	0.0280617	1.18701	3.8244	co_expression
TCONS_00005666	0	0.042243	1.19267	112174794	XM_024312604.1 Rosa chinensis carotenoid cleavage dioxygenase 8 homolog B, chloroplastic	0	0	0.102474	co_expression
TCONS_00005666	0	0.042243	1.19267	112175695	XM_024313416.1 Rosa chinensis uncharacterized protein At5g08430-like transcript variant X1,	0.418901	0.283819	10.3545	co_expression
TCONS_00005666	0	0.042243	1.19267	112175840	XM_024313591.1 Rosa chinensis glycine-rich protein DOT1-like	0	0	0.204084	co_expression
TCONS_00005666	0	0.042243	1.19267	112176075	XM_024313892.1 Rosa chinensis valine--tRNA ligase, mitochondrial 1-like	0	0	0.0300037	co_expression
TCONS_00005666	0	0.042243	1.19267	112176160	XM_024313984.1 Rosa chinensis cytochrome P450 71A3-like	0.267397	1.20741	8.64151	co_expression
TCONS_00005666	0	0.042243	1.19267	112176383	XM_024314282.1 Rosa chinensis AAA-ATPase At3g50940-like transcript variant X1,	0	0	0.0236993	co_expression
TCONS_00005666	0	0.042243	1.19267	112177332	XM_024315628.1 Rosa chinensis ethylene-responsive transcription factor ERF114-like	0.0664947	0.293025	2.6089	co_expression
TCONS_00005666	0	0.042243	1.19267	112177448	XM_024315736.1 Rosa chinensis late embryogenesis abundant protein At1g64065-like	0	0	0.0415863	co_expression
TCONS_00005666	0	0.042243	1.19267	112177660	XM_024315926.1 Rosa chinensis receptor-like protein EIX2	0.0163767	0.004759	0.0732347	co_expression
TCONS_00005666	0	0.042243	1.19267	112177793	XM_024316048.1 Rosa chinensis expansin-like B1	0.16524	0.0358307	7.59461	co_expression
TCONS_00005666	0	0.042243	1.19267	112178108	XM_024316313.1 Rosa chinensis protein NRT1/ PTR FAMILY 5.10-like	0	0	0.0386113	co_expression
TCONS_00005666	0	0.042243	1.19267	112178561	XM_024316713.1 Rosa chinensis expansin-like B1	0.0185397	0	0.262542	co_expression
TCONS_00005666	0	0.042243	1.19267	112178719	XM_024316913.1 Rosa chinensis protein NRT1/ PTR FAMILY 2.10-like	0.0528563	0.185852	11.9034	co_expression
TCONS_00005666	0	0.042243	1.19267	112178840	XM_024317080.1 Rosa chinensis transmembrane protein DDB_G0273707/DDB_G0273361 transcript variant X1,	0.962449	0.478528	3.77443	co_expression
TCONS_00005666	0	0.042243	1.19267	112179049	XM_024317364.1 Rosa chinensis protein P21-like	0.671207	1.98518	66.9822	co_expression
TCONS_00005666	0	0.042243	1.19267	112179190	XM_024317531.1 Rosa chinensis polyubiquitin-like	0.0893393	0.0873197	0.608132	co_expression
TCONS_00005666	0	0.042243	1.19267	112180098	XM_024318608.1 Rosa chinensis putative elongation of fatty acids protein DDB_G0272012	0	0	0.0431723	co_expression
TCONS_00005666	0	0.042243	1.19267	112180654	XM_024319245.1 Rosa chinensis silicon efflux transporter LSI2-like transcript variant X1,	0.774096	0.717179	4.81405	co_expression
TCONS_00005666	0	0.042243	1.19267	112180706	XM_024319265.1 Rosa chinensis cellulose synthase-like protein G3	0	0	0.148407	co_expression
TCONS_00005666	0	0.042243	1.19267	112180930	XM_024319504.1 Rosa chinensis glucan endo-1,3-beta-glucosidase, basic isoform-like	0	0.013223	1.82857	co_expression
TCONS_00005666	0	0.042243	1.19267	112181208	XM_024319649.1 Rosa chinensis uncharacterized LOC112181208	0	0	0.064633	co_expression
TCONS_00005666	0	0.042243	1.19267	112181388	--	0	0.0877733	1.57841	co_expression
TCONS_00005666	0	0.042243	1.19267	112181891	XM_024320294.1 Rosa chinensis thaumatin-like protein 1b	0.133526	0.394452	7.17159	co_expression
TCONS_00005666	0	0.042243	1.19267	112181992	XM_024320415.1 Rosa chinensis calcineurin B-like protein 7 transcript variant X1,	0.194034	0.258537	2.85696	co_expression
TCONS_00005666	0	0.042243	1.19267	112182407	XM_024320901.1 Rosa chinensis putative cysteine-rich receptor-like protein kinase 35	0	0	0.192573	co_expression
TCONS_00005666	0	0.042243	1.19267	112182532	XM_024321033.1 Rosa chinensis probable inactive receptor kinase At4g23740 transcript variant X1,	1.11981	0.790282	6.92685	co_expression
TCONS_00005666	0	0.042243	1.19267	112182755	XM_024321294.1 Rosa chinensis histone-lysine N-methyltransferase ATXR6	0	0	0.060175	co_expression
TCONS_00005666	0	0.042243	1.19267	112182784	XM_024321325.1 Rosa chinensis CASP-like protein 4D1	0	0.0487713	0.732321	co_expression
TCONS_00005666	0	0.042243	1.19267	112183666	XM_024322027.1 Rosa chinensis endochitinase-like	3.18585	1.08789	18.2832	co_expression
TCONS_00005666	0	0.042243	1.19267	112184465	--	0	0.014812	0.575488	co_expression
TCONS_00005666	0	0.042243	1.19267	112184716	XM_024322953.1 Rosa chinensis uncharacterized LOC112184716	0.011095	0	0.157814	co_expression
TCONS_00005666	0	0.042243	1.19267	112184846	XM_024323075.1 Rosa chinensis uncharacterized LOC112184846	0	0	0.013773	co_expression
TCONS_00005666	0	0.042243	1.19267	112184954	XM_024323175.1 Rosa chinensis receptor like protein 7-like	0.006569	0.00633067	0.534576	co_expression
TCONS_00005666	0	0.042243	1.19267	112185005	XM_024323222.1 Rosa chinensis uncharacterized LOC112185005	0.101803	0.183413	1.85959	co_expression
TCONS_00005666	0	0.042243	1.19267	112185088	XM_024323299.1 Rosa chinensis coatomer subunit beta'-1-like	0.567967	1.13449	14.9627	co_expression
TCONS_00005666	0	0.042243	1.19267	112185089	XM_024323300.1 Rosa chinensis coatomer subunit beta'-1-like	0	0.0482463	3.83873	co_expression
TCONS_00005666	0	0.042243	1.19267	112186455	XM_024324890.1 Rosa chinensis aminopeptidase M1-like transcript variant X1,	0.180185	0.157185	4.92374	co_expression
TCONS_00005666	0	0.042243	1.19267	112186544	XM_024324993.1 Rosa chinensis uncharacterized LOC112186544	0.121985	0.073726	4.9687	co_expression
TCONS_00005666	0	0.042243	1.19267	112186976	XM_024325559.1 Rosa chinensis uncharacterized LOC112186976	1.47516	2.65045	7.60384	co_expression
TCONS_00005666	0	0.042243	1.19267	112187080	XM_024325719.1 Rosa chinensis transcription factor MYBS3-like	0	0	0.03158	co_expression
TCONS_00005666	0	0.042243	1.19267	112187130	XM_024325788.1 Rosa chinensis abscisic acid 8'-hydroxylase 3-like	0	0	0.064178	co_expression
TCONS_00005666	0	0.042243	1.19267	112187138	XM_024325795.1 Rosa chinensis class V chitinase-like	0	0.0835223	1.80603	co_expression
TCONS_00005666	0	0.042243	1.19267	112187187	XM_024325869.1 Rosa chinensis wall-associated receptor kinase-like 22 transcript variant X1,	0.00771667	0.379922	2.18839	co_expression
TCONS_00005666	0	0.042243	1.19267	112187230	XM_024325930.1 Rosa chinensis G-type lectin S-receptor-like serine/threonine-protein kinase CES101	0.00557167	0.014704	1.06804	co_expression
TCONS_00005666	0	0.042243	1.19267	112187243	XM_024325956.1 Rosa chinensis uncharacterized LOC112187243	0	0	0.0207377	co_expression
TCONS_00005666	0	0.042243	1.19267	112187728	XM_024326626.1 Rosa chinensis patatin-like protein 1 transcript variant X1,	0	0.0207553	0.117804	co_expression
TCONS_00005666	0	0.042243	1.19267	112188330	XM_024327422.1 Rosa chinensis putative pentatricopeptide repeat-containing protein At1g10330 transcript variant X1,	1.10118	1.08175	1.67929	co_expression
TCONS_00005666	0	0.042243	1.19267	112188382	XM_024327486.1 Rosa chinensis E3 ubiquitin-protein ligase ATL41-like	0.03576	0.0209863	0.59203	co_expression
TCONS_00005666	0	0.042243	1.19267	112188493	XM_024327614.1 Rosa chinensis cysteine-rich repeat secretory protein 38-like	0.021988	0	0.54122	co_expression
TCONS_00005666	0	0.042243	1.19267	112188593	XM_024327740.1 Rosa chinensis UDP-glycosyltransferase 71A16-like	0.0212467	0.053529	0.528368	co_expression
TCONS_00005666	0	0.042243	1.19267	112188664	XM_024327827.1 Rosa chinensis putative UDP-rhamnose:rhamnosyltransferase 1	0	0.0255743	0.497991	co_expression
TCONS_00005666	0	0.042243	1.19267	112188873	XM_024328107.1 Rosa chinensis uncharacterized LOC112188873 transcript variant X1,	0	0.038209	0.498913	co_expression
TCONS_00005666	0	0.042243	1.19267	112188968	XM_024328209.1 Rosa chinensis dirigent protein 1-like	0	0.0212467	1.37509	co_expression
TCONS_00005666	0	0.042243	1.19267	112189021	XM_024328283.1 Rosa chinensis aldose 1-epimerase-like	0.136981	0	0.646473	co_expression
TCONS_00005666	0	0.042243	1.19267	112189539	XM_024328884.1 Rosa chinensis NAC domain-containing protein 92-like	1.18638	1.53375	15.9175	co_expression
TCONS_00005666	0	0.042243	1.19267	112189822	XM_024329180.1 Rosa chinensis probable leucine-rich repeat receptor-like protein kinase At1g35710 transcript variant X1,	0.310465	0.304978	1.92162	co_expression
TCONS_00005666	0	0.042243	1.19267	112189934	XM_024329330.1 Rosa chinensis VQ motif-containing protein 22	0.617302	0.512729	2.71082	co_expression
TCONS_00005666	0	0.042243	1.19267	112190144	XM_024329561.1 Rosa chinensis auxin-binding protein ABP19a-like	0.225639	0.368731	4.27974	co_expression
TCONS_00005666	0	0.042243	1.19267	112190620	XM_024330070.1 Rosa chinensis uncharacterized LOC112190620	0	0.079766	1.47732	co_expression
TCONS_00005666	0	0.042243	1.19267	112190696	XM_024330163.1 Rosa chinensis late embryogenesis abundant protein 2-like	0.349884	1.25257	5.03011	co_expression
TCONS_00005666	0	0.042243	1.19267	112191721	XM_024331124.1 Rosa chinensis uncharacterized protein At1g66480-like	0.0543597	0.188228	1.19764	co_expression
TCONS_00005666	0	0.042243	1.19267	112191861	XM_024331311.1 Rosa chinensis GABA transporter 1-like	0	0	1.0629	co_expression
TCONS_00005666	0	0.042243	1.19267	112192377	XM_024332075.1 Rosa chinensis probable leucine-rich repeat receptor-like protein kinase At5g49770	0.00993667	0.0380347	1.08871	co_expression
TCONS_00005666	0	0.042243	1.19267	112192816	XM_024332694.1 Rosa chinensis pathogenesis-related protein PR-4-like	0.105627	0.395003	6.59375	co_expression
TCONS_00005666	0	0.042243	1.19267	112192851	XM_024332753.1 Rosa chinensis cold and drought-regulated protein CORA-like	21.2365	6.63255	328.151	co_expression
TCONS_00005666	0	0.042243	1.19267	112192955	XM_024332903.1 Rosa chinensis auxin-induced protein 6B	0	0	0.0709003	co_expression
TCONS_00005666	0	0.042243	1.19267	112193150	XM_024333205.1 Rosa chinensis putative methyltransferase DDB_G0268948 transcript variant X1,	0.746835	0.807732	9.24305	co_expression
TCONS_00005666	0	0.042243	1.19267	112193482	--	0	0	0.108941	co_expression
TCONS_00005666	0	0.042243	1.19267	112193668	XM_024333890.1 Rosa chinensis beta-glucosidase BoGH3B-like transcript variant X1,	0.583861	0.412709	2.32066	co_expression
TCONS_00005666	0	0.042243	1.19267	112193928	XM_024334192.1 Rosa chinensis FRIGIDA-like protein 3	0	0	0.127085	co_expression
TCONS_00005666	0	0.042243	1.19267	112194768	XM_024334994.1 Rosa chinensis probable disease resistance protein At4g27220	0	0	0.0260007	co_expression
TCONS_00005666	0	0.042243	1.19267	112194902	XM_024335153.1 Rosa chinensis kinesin-like protein KIN-5C	0.0856247	0.043686	0.344386	co_expression
TCONS_00005666	0	0.042243	1.19267	112195006	XM_024335290.1 Rosa chinensis uncharacterized LOC112195006	0	0	0.0310933	co_expression
TCONS_00005666	0	0.042243	1.19267	112195155	XM_024335514.1 Rosa chinensis alpha carbonic anhydrase 7-like transcript variant X1,	0.017198	0	1.19242	co_expression
TCONS_00005666	0	0.042243	1.19267	112195168	XM_024335533.1 Rosa chinensis glucan endo-1,3-beta-glucosidase, basic isoform-like	0.153606	1.27055	34.2938	co_expression
TCONS_00005666	0	0.042243	1.19267	112195428	XM_024335866.1 Rosa chinensis MDIS1-interacting receptor like kinase 2-like	0.0414573	0	0.754781	co_expression
TCONS_00005666	0	0.042243	1.19267	112196857	XM_024337324.1 Rosa chinensis tropinone reductase homolog At1g07440-like	0.702869	0.942684	21.2208	co_expression
TCONS_00005666	0	0.042243	1.19267	112197063	XM_024337593.1 Rosa chinensis sugar transport protein 13-like	4.68946	3.4563	20.6703	co_expression
TCONS_00005666	0	0.042243	1.19267	112197151	XM_024337730.1 Rosa chinensis receptor like protein 6-like	0	0.0210067	0.459912	co_expression
TCONS_00005666	0	0.042243	1.19267	112197261	XM_024337879.1 Rosa chinensis major allergen Pru av 1-like	1.66781	1.31898	65.8709	co_expression
TCONS_00005666	0	0.042243	1.19267	112197308	XM_024337927.1 Rosa chinensis uncharacterized LOC112197308	0	0.0824977	2.88518	co_expression
TCONS_00005666	0	0.042243	1.19267	112197683	XM_024338448.1 Rosa chinensis D-galacturonate reductase	1.91603	1.89437	5.73473	co_expression
TCONS_00005666	0	0.042243	1.19267	112197853	XM_024338752.1 Rosa chinensis LEAF RUST 10 DISEASE-RESISTANCE LOCUS RECEPTOR-LIKE PROTEIN KINASE-like 1.1 transcript variant X1,	0.00758167	0.061393	0.216899	co_expression
TCONS_00005666	0	0.042243	1.19267	112197868	XM_024338784.1 Rosa chinensis cysteine-rich receptor-like protein kinase 2 transcript variant X1,	0.857144	1.02035	2.92804	co_expression
TCONS_00005666	0	0.042243	1.19267	112197995	XM_024338978.1 Rosa chinensis major allergen Pru ar 1-like	7.0429	16.4555	459.685	co_expression
TCONS_00005666	0	0.042243	1.19267	112198345	XM_024339448.1 Rosa chinensis VQ motif-containing protein 20-like	0.0170233	0.0385657	0.322604	co_expression
TCONS_00005666	0	0.042243	1.19267	112198466	XM_024339597.1 Rosa chinensis zinc-finger homeodomain protein 11-like	0.0311867	0.0382207	0.588052	co_expression
TCONS_00005666	0	0.042243	1.19267	112198485	XM_024339615.1 Rosa chinensis RING-H2 finger protein ATL70-like	0	0	0.0979043	co_expression
TCONS_00005666	0	0.042243	1.19267	112198546	XM_024339688.1 Rosa chinensis major allergen Pru ar 1-like	0.188125	0.61763	5.10401	co_expression
TCONS_00005666	0	0.042243	1.19267	112198825	XM_024339929.1 Rosa chinensis uncharacterized LOC112198825	0.168579	0.365527	0.965949	co_expression
TCONS_00005666	0	0.042243	1.19267	112199034	XM_024340100.1 Rosa chinensis uncharacterized LOC112199034	0	0.0737487	0.643221	co_expression
TCONS_00005666	0	0.042243	1.19267	112199143	XM_024340194.1 Rosa chinensis zinc finger protein JAGGED-like	0	0	0.0926843	co_expression
TCONS_00005666	0	0.042243	1.19267	112200276	XM_024341308.1 Rosa chinensis transcription initiation factor TFIID subunit 4b-like	0	0	0.037219	co_expression
TCONS_00005666	0	0.042243	1.19267	112200300	XM_024341328.1 Rosa chinensis 2-hydroxyisoflavanone dehydratase-like	0.322649	0.605166	4.41904	co_expression
TCONS_00005666	0	0.042243	1.19267	112200457	XM_024341488.1 Rosa chinensis receptor like protein 7-like	0.0197587	0	0.435415	co_expression
TCONS_00005666	0	0.042243	1.19267	112200495	XM_024341537.1 Rosa chinensis major allergen Pru av 1-like	0.221629	0.663669	7.23181	co_expression
TCONS_00005666	0	0.042243	1.19267	112200627	XM_024341650.1 Rosa chinensis major allergen Pru ar 1-like	5.1887	2.96384	39.0306	co_expression
TCONS_00005666	0	0.042243	1.19267	112200974	XM_024341981.1 Rosa chinensis tropinone reductase homolog At1g07440-like	1.76961	0.982492	6.32436	co_expression
TCONS_00005666	0	0.042243	1.19267	112201011	XM_024342023.1 Rosa chinensis protein NRT1/ PTR FAMILY 5.4-like	0	0	0.113854	co_expression
TCONS_00005666	0	0.042243	1.19267	112201084	XM_024342098.1 Rosa chinensis glycerophosphodiester phosphodiesterase GDPD3-like transcript variant X1,	0.00840467	0	0.104986	co_expression
TCONS_00005666	0	0.042243	1.19267	112201748	XM_024342668.1 Rosa chinensis cytochrome P450 CYP72A219-like	0.104111	0.047836	1.0362	co_expression
TCONS_00005666	0	0.042243	1.19267	112201965	--	0	0	0.145828	co_expression
TCONS_00005666	0	0.042243	1.19267	112202051	--	0	0	0.164393	co_expression
TCONS_00005666	0	0.042243	1.19267	112202241	XM_024343194.1 Rosa chinensis probable S-adenosylmethionine-dependent methyltransferase At5g38100	0	0.176674	1.55467	co_expression
TCONS_00005666	0	0.042243	1.19267	112202449	XM_024343462.1 Rosa chinensis scarecrow-like protein 30	0.153451	0.244815	1.17063	co_expression
TCONS_00005666	0	0.042243	1.19267	112202453	XM_024343465.1 Rosa chinensis scarecrow-like protein 14	0	0	0.029351	co_expression
TCONS_00005666	0	0.042243	1.19267	112202648	XM_024343650.1 Rosa chinensis probable LRR receptor-like serine/threonine-protein kinase At3g47570	0	0.035013	0.273471	co_expression
TCONS_00005666	0	0.042243	1.19267	112202832	XM_024343846.1 Rosa chinensis G-type lectin S-receptor-like serine/threonine-protein kinase SD1-1 transcript variant X1,	0.101053	0.225138	1.05431	co_expression
TCONS_00005666	0	0.042243	1.19267	112202851	XM_024343872.1 Rosa chinensis polyphenol oxidase, chloroplastic-like	0	0.0155883	0.906828	co_expression
TCONS_00005666	0	0.042243	1.19267	112203110	XM_024344127.1 Rosa chinensis F-box protein SKIP19-like	0	0	0.0424457	co_expression
TCONS_00005666	0	0.042243	1.19267	112203149	XM_024344159.1 Rosa chinensis wall-associated receptor kinase 1-like	0.006469	0.0174063	0.0716407	co_expression
TCONS_00005666	0	0.042243	1.19267	112203502	XM_024344468.1 Rosa chinensis receptor like protein 7-like	0.0131513	0.00359067	0.130216	co_expression
TCONS_00005666	0	0.042243	1.19267	112203527	XM_024344487.1 Rosa chinensis homeobox-leucine zipper protein ATHB-52-like	0	0	0.121649	co_expression
TCONS_00005666	0	0.042243	1.19267	112203640	XM_024344572.1 Rosa chinensis uncharacterized LOC112203640	0	0	0.04691	co_expression
TCONS_00005666	0	0.042243	1.19267	112203711	XM_024344635.1 Rosa chinensis probable leucine-rich repeat receptor-like protein kinase At2g33170	0	0	0.00373867	co_expression
TCONS_00005666	0	0.042243	1.19267	112203866	XM_024344774.1 Rosa chinensis G-type lectin S-receptor-like serine/threonine-protein kinase At4g27290	0.0186747	0.0670003	0.253739	co_expression
TCONS_00005860	44.668	1.9646	36.9009	112164583	XM_024300816.1 Rosa chinensis disease resistance-like protein DSC2 transcript variant X1,	0.019885	0	0.0200193	co_expression
TCONS_00005860	44.668	1.9646	36.9009	112171584	XM_024308746.1 Rosa chinensis uncharacterized LOC112171584	0.0215677	0	0.0293097	co_expression
TCONS_00005860	44.668	1.9646	36.9009	112184017	--	0.116488	0	0.0592263	co_expression
TCONS_00005860	44.668	1.9646	36.9009	112198673	XM_024339805.1 Rosa chinensis zinc finger MYM-type protein 1-like	0.031947	0	0.027066	co_expression
TCONS_00006367	0	0	0.849339	112164143	XM_024300382.1 Rosa chinensis glycine-rich cell wall structural protein 2-like	0.117585	0.599467	3.75887	co_expression
TCONS_00006367	0	0	0.849339	112164254	XM_024300477.1 Rosa chinensis uncharacterized LOC112164254	0	0.088571	1.11085	co_expression
TCONS_00006367	0	0	0.849339	112164273	XM_024300492.1 Rosa chinensis uncharacterized LOC112164273	0	0	0.129237	co_expression
TCONS_00006367	0	0	0.849339	112164743	XM_024301035.1 Rosa chinensis cytochrome P450 CYP72A219-like	0.177431	1.2996	46.9945	co_expression
TCONS_00006367	0	0	0.849339	112165006	XM_024301382.1 Rosa chinensis probable LRR receptor-like serine/threonine-protein kinase At3g47570	0.548386	0.549406	3.2014	co_expression
TCONS_00006367	0	0	0.849339	112165174	XM_024301607.1 Rosa chinensis senescence-specific cysteine protease SAG12-like	0.157512	0.658921	68.1203	co_expression
TCONS_00006367	0	0	0.849339	112165229	XM_024301678.1 Rosa chinensis NAC transcription factor 56-like	1.24929	2.83157	9.79	co_expression
TCONS_00006367	0	0	0.849339	112165277	XM_024301760.1 Rosa chinensis fatty acid desaturase 4, chloroplastic	0.051787	0.540439	15.6892	co_expression
TCONS_00006367	0	0	0.849339	112165441	XM_024301945.1 Rosa chinensis G-type lectin S-receptor-like serine/threonine-protein kinase LECRK2 transcript variant X1,	0.288753	0.414498	2.20106	co_expression
TCONS_00006367	0	0	0.849339	112165442	XM_024301946.1 Rosa chinensis G-type lectin S-receptor-like serine/threonine-protein kinase LECRK3 transcript variant X1,	0.126263	0.090918	0.667763	co_expression
TCONS_00006367	0	0	0.849339	112165443	XM_024301948.1 Rosa chinensis G-type lectin S-receptor-like serine/threonine-protein kinase LECRK3	0.158911	0.268974	1.61488	co_expression
TCONS_00006367	0	0	0.849339	112165571	XM_024302127.1 Rosa chinensis (S)-2-hydroxy-acid oxidase GLO1 transcript variant X1,	0.335918	0.523783	3.81607	co_expression
TCONS_00006367	0	0	0.849339	112165832	XM_024302515.1 Rosa chinensis pathogenesis-related genes transcriptional activator PTI5-like	0.190562	0.178666	2.95841	co_expression
TCONS_00006367	0	0	0.849339	112165851	XM_024302548.1 Rosa chinensis TMV resistance protein N-like transcript variant X1,	0.0512997	0.080741	0.645438	co_expression
TCONS_00006367	0	0	0.849339	112166255	--	0.0246127	0.0205577	1.84399	co_expression
TCONS_00006367	0	0	0.849339	112166277	XM_024303079.1 Rosa chinensis oligopeptide transporter 3	3.71303	10.2691	27.5293	co_expression
TCONS_00006367	0	0	0.849339	112166319	XM_024303135.1 Rosa chinensis probable WRKY transcription factor 71	0.0370123	0.075632	7.51642	co_expression
TCONS_00006367	0	0	0.849339	112166858	XM_024303784.1 Rosa chinensis receptor-like protein 9DC3	0	0	0.191697	co_expression
TCONS_00006367	0	0	0.849339	112167025	XM_024303980.1 Rosa chinensis chlorophyll a-b binding protein CP26, chloroplastic	0.729868	0.699812	5.99168	co_expression
TCONS_00006367	0	0	0.849339	112167227	XM_024304214.1 Rosa chinensis cyclic nucleotide-gated ion channel 4	0.00795133	0	0.200768	co_expression
TCONS_00006367	0	0	0.849339	112167398	XM_024304412.1 Rosa chinensis F-box protein At4g22390-like transcript variant X1,	0.0345697	0	0.399427	co_expression
TCONS_00006367	0	0	0.849339	112167757	XM_024304822.1 Rosa chinensis uncharacterized LOC112167757 transcript variant X1,	0.488693	0.365783	1.74742	co_expression
TCONS_00006367	0	0	0.849339	112168090	XM_024305214.1 Rosa chinensis LOB domain-containing protein 4	0.308529	0.308909	7.45836	co_expression
TCONS_00006367	0	0	0.849339	112168180	XM_024305298.1 Rosa chinensis probable aminotransferase TAT2	64.5034	96.0947	221.129	co_expression
TCONS_00006367	0	0	0.849339	112168290	XM_024305409.1 Rosa chinensis protein SRG1-like	0	0	1.83544	co_expression
TCONS_00006367	0	0	0.849339	112168291	XM_024305410.1 Rosa chinensis kunitz trypsin inhibitor 2-like	0.062975	0.148586	9.97898	co_expression
TCONS_00006367	0	0	0.849339	112168454	XM_024305574.1 Rosa chinensis uncharacterized LOC112168454	0.496439	0.647168	2.58878	co_expression
TCONS_00006367	0	0	0.849339	112168799	XM_024305719.1 Rosa chinensis BURP domain protein USPL1-like	1.9641	1.20351	7.17313	co_expression
TCONS_00006367	0	0	0.849339	112169376	XM_024306403.1 Rosa chinensis cytochrome P450 703A2	0	0	0.271691	co_expression
TCONS_00006367	0	0	0.849339	112169983	XM_024307116.1 Rosa chinensis laccase-14-like	7.00027	6.85724	30.8336	co_expression
TCONS_00006367	0	0	0.849339	112170244	XM_024307452.1 Rosa chinensis pentatricopeptide repeat-containing protein At1g06143 transcript variant X1,	0.32565	0.249072	3.39428	co_expression
TCONS_00006367	0	0	0.849339	112170318	XM_024307568.1 Rosa chinensis probable glutathione S-transferase	0.0217597	0.0246477	4.80559	co_expression
TCONS_00006367	0	0	0.849339	112170507	XM_024307826.1 Rosa chinensis PXMP2/4 family protein 4-like	2.15094	3.01938	18.418	co_expression
TCONS_00006367	0	0	0.849339	112170508	XM_024307827.1 Rosa chinensis protein TIME FOR COFFEE transcript variant X1,	0.0867723	0.175033	0.799489	co_expression
TCONS_00006367	0	0	0.849339	112170518	XM_024307841.1 Rosa chinensis histone-lysine N-methyltransferase ASHR1-like transcript variant X1,	0.0454273	0.0335743	0.478625	co_expression
TCONS_00006367	0	0	0.849339	112171324	XM_024308524.1 Rosa chinensis uncharacterized LOC112171324	21.9022	26.9847	220.853	co_expression
TCONS_00006367	0	0	0.849339	112171502	XM_024308678.1 Rosa chinensis TMV resistance protein N-like	0.0389597	0.0332547	0.394777	co_expression
TCONS_00006367	0	0	0.849339	112171515	XM_024308687.1 Rosa chinensis polygalacturonase-like	0	0	3.21246	co_expression
TCONS_00006367	0	0	0.849339	112171527	XM_024308698.1 Rosa chinensis 12S seed storage protein CRA1-like	0	0	2.40449	co_expression
TCONS_00006367	0	0	0.849339	112171959	XM_024309087.1 Rosa chinensis NPC intracellular cholesterol transporter 1-like transcript variant X1,	2.87392	2.57768	8.88324	co_expression
TCONS_00006367	0	0	0.849339	112172082	XM_024309257.1 Rosa chinensis transcription factor MYB8-like	0.046011	0.195386	1.26641	co_expression
TCONS_00006367	0	0	0.849339	112172125	XM_024309318.1 Rosa chinensis uncharacterized LOC112172125	0.00593733	0.0103413	2.2308	co_expression
TCONS_00006367	0	0	0.849339	112172348	XM_024309648.1 Rosa chinensis DNA-directed RNA polymerase II subunit 4-like	0	0.0689937	6.1596	co_expression
TCONS_00006367	0	0	0.849339	112172375	XM_024309691.1 Rosa chinensis protein PLASTID MOVEMENT IMPAIRED 1	4.71814	4.14337	15.4667	co_expression
TCONS_00006367	0	0	0.849339	112172660	XM_024310096.1 Rosa chinensis uncharacterized LOC112172660	0.482919	1.98145	34.953	co_expression
TCONS_00006367	0	0	0.849339	112172865	XM_024310363.1 Rosa chinensis chloroplast envelope quinone oxidoreductase homolog	1.91715	2.5538	9.80749	co_expression
TCONS_00006367	0	0	0.849339	112173137	XM_024310704.1 Rosa chinensis alcohol dehydrogenase-like 7 transcript variant X1,	1.69505	3.07115	11.6203	co_expression
TCONS_00006367	0	0	0.849339	112173152	XM_024310724.1 Rosa chinensis B3 domain-containing protein Os01g0723500-like transcript variant X1,	0.0828417	0.0310327	1.39624	co_expression
TCONS_00006367	0	0	0.849339	112173176	XM_024310757.1 Rosa chinensis cytochrome P450 94A2-like	0.022815	0.0853047	3.50822	co_expression
TCONS_00006367	0	0	0.849339	112173247	XM_024310835.1 Rosa chinensis TMV resistance protein N-like transcript variant X1,	0.436726	0.543982	3.29978	co_expression
TCONS_00006367	0	0	0.849339	112173251	XM_024310843.1 Rosa chinensis F-box/kelch-repeat protein At3g23880-like	0.118823	0.225602	7.59118	co_expression
TCONS_00006367	0	0	0.849339	112173494	XM_024311131.1 Rosa chinensis protein NRT1/ PTR FAMILY 4.4-like	0	0.006178	0.468385	co_expression
TCONS_00006367	0	0	0.849339	112173534	XM_024311169.1 Rosa chinensis putative disease resistance protein RGA3	0.206774	0.231558	1.00339	co_expression
TCONS_00006367	0	0	0.849339	112173665	XM_024311348.1 Rosa chinensis UDP-glycosyltransferase 73B4-like	0.0210983	0.250841	5.1597	co_expression
TCONS_00006367	0	0	0.849339	112173721	XM_024311404.1 Rosa chinensis DNA-directed RNA polymerase I subunit 2 transcript variant X1,	0.925035	0.763453	5.18585	co_expression
TCONS_00006367	0	0	0.849339	112173726	XM_024311408.1 Rosa chinensis GDSL esterase/lipase At1g29670-like	0.29853	0.452788	2.33352	co_expression
TCONS_00006367	0	0	0.849339	112173787	XM_024311473.1 Rosa chinensis senescence-specific cysteine protease SAG39-like	0	0.003579	0.102995	co_expression
TCONS_00006367	0	0	0.849339	112173897	XM_024311590.1 Rosa chinensis uncharacterized LOC112173897	1.99903	2.75498	9.0792	co_expression
TCONS_00006367	0	0	0.849339	112174147	XM_024311863.1 Rosa chinensis glycolipid transfer protein 1-like	0	0.0731527	1.05292	co_expression
TCONS_00006367	0	0	0.849339	112174266	XM_024312001.1 Rosa chinensis anti-sigma-I factor RsgI6-like	0.167216	0	1.44354	co_expression
TCONS_00006367	0	0	0.849339	112174407	XM_024312178.1 Rosa chinensis GDSL esterase/lipase At4g10955-like	0.070861	0.0548913	0.423636	co_expression
TCONS_00006367	0	0	0.849339	112174495	XM_024312269.1 Rosa chinensis neutral ceramidase 2-like	0	0	0.0234223	co_expression
TCONS_00006367	0	0	0.849339	112174518	XM_024312300.1 Rosa chinensis endo-1,3;1,4-beta-D-glucanase-like	6.35331	10.9196	33.2122	co_expression
TCONS_00006367	0	0	0.849339	112174586	XM_024312386.1 Rosa chinensis protein ALP1-like	0.025495	0.0312753	3.15863	co_expression
TCONS_00006367	0	0	0.849339	112174777	XM_024312586.1 Rosa chinensis calcium-transporting ATPase 12, plasma membrane-type transcript variant X1,	2.73305	1.05837	11.3467	co_expression
TCONS_00006367	0	0	0.849339	112175334	XM_024313007.1 Rosa chinensis disease resistance response protein 206-like	0.091747	0.067343	7.96826	co_expression
TCONS_00006367	0	0	0.849339	112175368	XM_024313038.1 Rosa chinensis glutathione S-transferase U9-like transcript variant X1,	0.0892673	0.068025	0.840293	co_expression
TCONS_00006367	0	0	0.849339	112175387	XM_024313057.1 Rosa chinensis primary amine oxidase-like	1.11199	1.15545	6.14309	co_expression
TCONS_00006367	0	0	0.849339	112175508	XM_024313178.1 Rosa chinensis protein NRT1/ PTR FAMILY 6.3	0.0766953	0.0903133	15.6397	co_expression
TCONS_00006367	0	0	0.849339	112175731	XM_024313459.1 Rosa chinensis 60S ribosomal protein L44	0.36786	0.2505	2.77126	co_expression
TCONS_00006367	0	0	0.849339	112175801	XM_024313551.1 Rosa chinensis flavonoid 3'-monooxygenase-like	0.0703583	0.253552	2.22162	co_expression
TCONS_00006367	0	0	0.849339	112175810	XM_024313556.1 Rosa chinensis methanol O-anthraniloyltransferase-like	1.46562	0.330334	6.38613	co_expression
TCONS_00006367	0	0	0.849339	112176354	XM_024314228.1 Rosa chinensis uncharacterized LOC112176354	0.598367	5.03803	50.2298	co_expression
TCONS_00006367	0	0	0.849339	112176502	XM_024314461.1 Rosa chinensis subtilisin-like protease SBT3.3	0.440077	0.944166	4.93432	co_expression
TCONS_00006367	0	0	0.849339	112176707	XM_024314763.1 Rosa chinensis metal-nicotianamine transporter YSL1 transcript variant X1,	0.1149	0.798427	12.1072	co_expression
TCONS_00006367	0	0	0.849339	112176764	XM_024314833.1 Rosa chinensis COP1-interactive protein 1-like	0.005973	0.024075	0.166112	co_expression
TCONS_00006367	0	0	0.849339	112176907	XM_024315042.1 Rosa chinensis palmitoyl-monogalactosyldiacylglycerol delta-7 desaturase, chloroplastic-like	0	0	0.426265	co_expression
TCONS_00006367	0	0	0.849339	112176968	XM_024315113.1 Rosa chinensis U-box domain-containing protein 19-like	2.79305	4.68794	144.203	co_expression
TCONS_00006367	0	0	0.849339	112176971	--	0	0	0.051071	co_expression
TCONS_00006367	0	0	0.849339	112177146	XM_024315362.1 Rosa chinensis urea-proton symporter DUR3-like transcript variant X1,	8.32768	5.27831	22.3672	co_expression
TCONS_00006367	0	0	0.849339	112177237	XM_024315526.1 Rosa chinensis probable glutathione S-transferase	0	0	2.12945	co_expression
TCONS_00006367	0	0	0.849339	112177445	XM_024315733.1 Rosa chinensis uncharacterized LOC112177445	0.0335883	0.279838	2.54525	co_expression
TCONS_00006367	0	0	0.849339	112177594	XM_024315876.1 Rosa chinensis cytochrome P450 714A1-like	0	0	0.210447	co_expression
TCONS_00006367	0	0	0.849339	112177793	XM_024316048.1 Rosa chinensis expansin-like B1	0.16524	0.0358307	7.59461	co_expression
TCONS_00006367	0	0	0.849339	112177808	XM_024316061.1 Rosa chinensis NAC domain-containing protein 67-like	0.00190333	0.00923233	0.272048	co_expression
TCONS_00006367	0	0	0.849339	112177840	XM_024316090.1 Rosa chinensis probable LRR receptor-like serine/threonine-protein kinase At1g56140	0.0494887	0.0565257	0.386655	co_expression
TCONS_00006367	0	0	0.849339	112177927	--	0.132354	5.34114	34.6594	co_expression
TCONS_00006367	0	0	0.849339	112178018	XM_024316239.1 Rosa chinensis WAT1-related protein At1g25270-like	0	0.016863	0.148836	co_expression
TCONS_00006367	0	0	0.849339	112178062	XM_024316299.1 Rosa chinensis uncharacterized LOC112178062	0.47229	18.731	126.32	co_expression
TCONS_00006367	0	0	0.849339	112178289	XM_024316450.1 Rosa chinensis acyl-CoA 5-desaturase AL21-like partial	0	0	0.366536	co_expression
TCONS_00006367	0	0	0.849339	112178337	XM_024316493.1 Rosa chinensis uncharacterized LOC112178337	0	0	0.963303	co_expression
TCONS_00006367	0	0	0.849339	112178610	XM_024316780.1 Rosa chinensis receptor-like protein EIX2 transcript variant X1,	0.135819	0.0923097	3.06626	co_expression
TCONS_00006367	0	0	0.849339	112178612	XM_024316784.1 Rosa chinensis beta-amylase 3, chloroplastic	0.209342	0.105921	1.82194	co_expression
TCONS_00006367	0	0	0.849339	112178736	XM_024316940.1 Rosa chinensis aluminum-activated malate transporter 12-like	0.0100267	0.0105243	0.174137	co_expression
TCONS_00006367	0	0	0.849339	112179049	XM_024317364.1 Rosa chinensis protein P21-like	0.671207	1.98518	66.9822	co_expression
TCONS_00006367	0	0	0.849339	112179088	XM_024317410.1 Rosa chinensis glutathione S-transferase U10-like	0	0	0.0444163	co_expression
TCONS_00006367	0	0	0.849339	112179092	XM_024317418.1 Rosa chinensis phytochrome-interacting ankyrin-repeat protein 2-like	22.8294	24.6721	42.9231	co_expression
TCONS_00006367	0	0	0.849339	112179289	XM_024317667.1 Rosa chinensis probable glycerol-3-phosphate acyltransferase 3	0.390924	3.15271	88.8301	co_expression
TCONS_00006367	0	0	0.849339	112179348	XM_024317747.1 Rosa chinensis uncharacterized protein At4g14100-like	0.112037	0.070083	0.72171	co_expression
TCONS_00006367	0	0	0.849339	112179353	XM_024317751.1 Rosa chinensis LEAF RUST 10 DISEASE-RESISTANCE LOCUS RECEPTOR-LIKE PROTEIN KINASE-like 1.2 transcript variant X1,	0.110298	0.262512	3.71963	co_expression
TCONS_00006367	0	0	0.849339	112179392	XM_024317789.1 Rosa chinensis heavy metal-associated isoprenylated plant protein 24	0.0194277	0.0410583	7.32969	co_expression
TCONS_00006367	0	0	0.849339	112179554	XM_024318013.1 Rosa chinensis (-)-isopiperitenol/(-)-carveol dehydrogenase, mitochondrial-like	0.00949433	0.117486	0.643927	co_expression
TCONS_00006367	0	0	0.849339	112179559	XM_024318016.1 Rosa chinensis protein NRT1/ PTR FAMILY 4.3-like	0.04274	0.39609	9.57622	co_expression
TCONS_00006367	0	0	0.849339	112179707	XM_024318170.1 Rosa chinensis wall-associated receptor kinase-like 22	0	0	0.126254	co_expression
TCONS_00006367	0	0	0.849339	112179936	XM_024318428.1 Rosa chinensis (R,S)-reticuline 7-O-methyltransferase-like	0	0	0.236779	co_expression
TCONS_00006367	0	0	0.849339	112180113	XM_024318620.1 Rosa chinensis NDR1/HIN1-like protein 6	1.26524	4.54643	31.8825	co_expression
TCONS_00006367	0	0	0.849339	112180272	XM_024318802.1 Rosa chinensis protein DMP3	0.068481	0.661319	4.58266	co_expression
TCONS_00006367	0	0	0.849339	112180290	XM_024318818.1 Rosa chinensis disease resistance protein RGA2-like transcript variant X1,	1.39906	1.74316	7.28669	co_expression
TCONS_00006367	0	0	0.849339	112180566	XM_024319121.1 Rosa chinensis probable serine/threonine-protein kinase PBL11	0	0.00953633	0.503874	co_expression
TCONS_00006367	0	0	0.849339	112181277	--	0.00455167	0	0.21286	co_expression
TCONS_00006367	0	0	0.849339	112181590	XM_024319966.1 Rosa chinensis putative disease resistance protein RGA1	0.020579	0.049782	0.723799	co_expression
TCONS_00006367	0	0	0.849339	112181639	--	0.0335193	0.0834597	1.17872	co_expression
TCONS_00006367	0	0	0.849339	112181980	XM_024320392.1 Rosa chinensis protein TSS transcript variant X1,	0.755471	0.666593	3.49177	co_expression
TCONS_00006367	0	0	0.849339	112181992	XM_024320415.1 Rosa chinensis calcineurin B-like protein 7 transcript variant X1,	0.194034	0.258537	2.85696	co_expression
TCONS_00006367	0	0	0.849339	112182186	XM_024320635.1 Rosa chinensis synaptotagmin-3 transcript variant X1,	0	0	0.166398	co_expression
TCONS_00006367	0	0	0.849339	112182344	XM_024320825.1 Rosa chinensis uncharacterized LOC112182344 transcript variant X1,	0.0119417	0.311029	1.76062	co_expression
TCONS_00006367	0	0	0.849339	112182428	--	0.478833	0.257899	4.49164	co_expression
TCONS_00006367	0	0	0.849339	112182507	XM_024321001.1 Rosa chinensis glutathione transferase GST 23-like	0.207048	0.578502	3.25853	co_expression
TCONS_00006367	0	0	0.849339	112182730	XM_024321264.1 Rosa chinensis receptor-like cytoplasmic kinase 176 transcript variant X1,	0.239501	0.327765	1.50751	co_expression
TCONS_00006367	0	0	0.849339	112182940	XM_024321501.1 Rosa chinensis auxin transporter-like protein 2 transcript variant X1,	1.60252	4.09707	20.3123	co_expression
TCONS_00006367	0	0	0.849339	112182967	XM_024321542.1 Rosa chinensis phosphoinositide phospholipase C 6-like	0.128045	0.195573	0.943203	co_expression
TCONS_00006367	0	0	0.849339	112182977	XM_024321562.1 Rosa chinensis probable LRR receptor-like serine/threonine-protein kinase At3g47570 transcript variant X1,	0	0.010792	0.0827193	co_expression
TCONS_00006367	0	0	0.849339	112183358	XM_024321712.1 Rosa chinensis stress-induced protein KIN2-like	0	0.469975	2.39787	co_expression
TCONS_00006367	0	0	0.849339	112183435	XM_024321817.1 Rosa chinensis uncharacterized LOC112183435	4.18861	5.10256	14.8282	co_expression
TCONS_00006367	0	0	0.849339	112183508	XM_024321895.1 Rosa chinensis probable protein phosphatase 2C 8 transcript variant X1,	0.567466	1.90796	12.3104	co_expression
TCONS_00006367	0	0	0.849339	112183887	XM_024322206.1 Rosa chinensis uncharacterized LOC112183887	0.8983	4.65122	43.4345	co_expression
TCONS_00006367	0	0	0.849339	112183985	XM_024322300.1 Rosa chinensis protein ALP1-like	0.0534573	0.0256717	0.774586	co_expression
TCONS_00006367	0	0	0.849339	112184151	--	0.01488	0.0280637	0.314013	co_expression
TCONS_00006367	0	0	0.849339	112184248	XM_024322512.1 Rosa chinensis putative nuclease HARBI1	0.322824	0.371179	1.50574	co_expression
TCONS_00006367	0	0	0.849339	112184303	XM_024322568.1 Rosa chinensis homeobox-leucine zipper protein ATHB-12-like transcript variant X1,	0.741521	12.0847	185.881	co_expression
TCONS_00006367	0	0	0.849339	112184533	XM_024322797.1 Rosa chinensis (6-4)DNA photolyase	0.718824	1.06695	8.37714	co_expression
TCONS_00006367	0	0	0.849339	112184591	XM_024322852.1 Rosa chinensis NDR1/HIN1-like protein 26	0.104053	0.730437	9.97499	co_expression
TCONS_00006367	0	0	0.849339	112184716	XM_024322953.1 Rosa chinensis uncharacterized LOC112184716	0.011095	0	0.157814	co_expression
TCONS_00006367	0	0	0.849339	112184956	XM_024323177.1 Rosa chinensis uncharacterized LOC112184956	0	0	0.159127	co_expression
TCONS_00006367	0	0	0.849339	112185088	XM_024323299.1 Rosa chinensis coatomer subunit beta'-1-like	0.567967	1.13449	14.9627	co_expression
TCONS_00006367	0	0	0.849339	112185089	XM_024323300.1 Rosa chinensis coatomer subunit beta'-1-like	0	0.0482463	3.83873	co_expression
TCONS_00006367	0	0	0.849339	112185404	XM_024323645.1 Rosa chinensis protein phosphatase 2C 77-like	0.684271	0.958539	49.4625	co_expression
TCONS_00006367	0	0	0.849339	112185586	XM_024323845.1 Rosa chinensis protein SRG1-like	0.0915973	0.505046	5.18262	co_expression
TCONS_00006367	0	0	0.849339	112186068	XM_024324426.1 Rosa chinensis long chain acyl-CoA synthetase 8-like	0.197107	0.443931	5.95748	co_expression
TCONS_00006367	0	0	0.849339	112186380	XM_024324775.1 Rosa chinensis probable caffeoyl-CoA O-methyltransferase At4g26220 transcript variant X1,	1.30772	0.784718	16.466	co_expression
TCONS_00006367	0	0	0.849339	112186430	XM_024324861.1 Rosa chinensis plasma membrane ATPase 1-like	0.598869	0.275232	8.34271	co_expression
TCONS_00006367	0	0	0.849339	112186456	XM_024324894.1 Rosa chinensis aminopeptidase M1-like transcript variant X1,	0.0906577	0.142563	1.71139	co_expression
TCONS_00006367	0	0	0.849339	112186479	XM_024324929.1 Rosa chinensis probable polyamine oxidase 2	71.3176	68.0026	159.658	co_expression
TCONS_00006367	0	0	0.849339	112186544	XM_024324993.1 Rosa chinensis uncharacterized LOC112186544	0.121985	0.073726	4.9687	co_expression
TCONS_00006367	0	0	0.849339	112186570	XM_024325034.1 Rosa chinensis receptor like protein 7-like transcript variant X1,	0.162957	0.274099	2.09596	co_expression
TCONS_00006367	0	0	0.849339	112186612	XM_024325078.1 Rosa chinensis dynein light chain 1, cytoplasmic-like	6.25399	5.14464	34.1019	co_expression
TCONS_00006367	0	0	0.849339	112187009	XM_024325614.1 Rosa chinensis aldehyde dehydrogenase family 3 member H1-like transcript variant X1,	0.349933	0.810239	6.17116	co_expression
TCONS_00006367	0	0	0.849339	112187155	XM_024325820.1 Rosa chinensis heat shock factor protein HSF24	1.84523	1.8868	53.5752	co_expression
TCONS_00006367	0	0	0.849339	112187243	XM_024325956.1 Rosa chinensis uncharacterized LOC112187243	0	0	0.0207377	co_expression
TCONS_00006367	0	0	0.849339	112187474	XM_024326275.1 Rosa chinensis periodic tryptophan protein 2	0.646054	0.35405	2.92356	co_expression
TCONS_00006367	0	0	0.849339	112187813	XM_024326759.1 Rosa chinensis dirigent protein 23-like	0.0223443	0.0128953	0.276199	co_expression
TCONS_00006367	0	0	0.849339	112187896	XM_024326860.1 Rosa chinensis 7-deoxyloganetin glucosyltransferase-like	0.448429	0.88754	5.14581	co_expression
TCONS_00006367	0	0	0.849339	112187900	XM_024326865.1 Rosa chinensis subtilisin-like protease SBT5.3	0.027918	0.405087	5.05662	co_expression
TCONS_00006367	0	0	0.849339	112188242	XM_024327323.1 Rosa chinensis beta-amyrin synthase-like	0.011655	0.128356	2.09684	co_expression
TCONS_00006367	0	0	0.849339	112188328	XM_024327419.1 Rosa chinensis cellulose synthase-like protein H1 transcript variant X1,	0.108141	0.0572777	3.13625	co_expression
TCONS_00006367	0	0	0.849339	112188371	XM_024327475.1 Rosa chinensis laccase-15-like	0.0355443	0.0208877	0.567997	co_expression
TCONS_00006367	0	0	0.849339	112188712	XM_024327888.1 Rosa chinensis transcription factor TGA4-like transcript variant X1,	0.009255	0.315115	3.48308	co_expression
TCONS_00006367	0	0	0.849339	112189000	XM_024328252.1 Rosa chinensis F-box/LRR-repeat protein 4	2.93576	5.58795	13.3786	co_expression
TCONS_00006367	0	0	0.849339	112189040	XM_024328304.1 Rosa chinensis laccase-15-like	0.0163593	0	1.74329	co_expression
TCONS_00006367	0	0	0.849339	112189180	XM_024328457.1 Rosa chinensis codeine O-demethylase-like	0.15177	5.75225	35.6754	co_expression
TCONS_00006367	0	0	0.849339	112189352	XM_024328667.1 Rosa chinensis ankyrin repeat-containing protein ITN1-like transcript variant X1,	0.322812	0.35	0.0566943	co_expression
TCONS_00006367	0	0	0.849339	112189571	XM_024328916.1 Rosa chinensis auxin-binding protein ABP19a-like	7.70263	6.87632	47.9639	co_expression
TCONS_00006367	0	0	0.849339	112189645	XM_024328992.1 Rosa chinensis uncharacterized LOC112189645	0	0.560511	2.08177	co_expression
TCONS_00006367	0	0	0.849339	112189762	XM_024329111.1 Rosa chinensis pre- cleavage factor Im 25 kDa subunit 1 mRNA	0.37947	0.309393	3.18445	co_expression
TCONS_00006367	0	0	0.849339	112190146	XM_024329563.1 Rosa chinensis aldehyde dehydrogenase family 2 member C4-like	0.0197243	0.0221187	4.05893	co_expression
TCONS_00006367	0	0	0.849339	112190201	XM_024329624.1 Rosa chinensis salicylic acid-binding protein 2-like	2.51796	29.2751	239.55	co_expression
TCONS_00006367	0	0	0.849339	112191883	XM_024331360.1 Rosa chinensis protein NRT1/ PTR FAMILY 8.2-like transcript variant X1,	0.444736	0.186231	2.29211	co_expression
TCONS_00006367	0	0	0.849339	112192007	XM_024331516.1 Rosa chinensis glucan endo-1,3-beta-glucosidase, basic isoform-like	0	0	0.229799	co_expression
TCONS_00006367	0	0	0.849339	112192051	XM_024331572.1 Rosa chinensis tetraketide alpha-pyrone reductase 1-like	0	0.0101833	0.259852	co_expression
TCONS_00006367	0	0	0.849339	112192190	XM_024331783.1 Rosa chinensis uncharacterized LOC112192190 transcript variant X1,	0	0.148726	1.36392	co_expression
TCONS_00006367	0	0	0.849339	112192197	--	0	0.0357457	0.949324	co_expression
TCONS_00006367	0	0	0.849339	112192257	XM_024331912.1 Rosa chinensis probable WRKY transcription factor 23	0.0428217	0.0350623	0.7863	co_expression
TCONS_00006367	0	0	0.849339	112192325	XM_024331987.1 Rosa chinensis aldehyde dehydrogenase family 2 member C4-like	0	0.016978	0.811966	co_expression
TCONS_00006367	0	0	0.849339	112192377	XM_024332075.1 Rosa chinensis probable leucine-rich repeat receptor-like protein kinase At5g49770	0.00993667	0.0380347	1.08871	co_expression
TCONS_00006367	0	0	0.849339	112192684	XM_024332533.1 Rosa chinensis probable glycosyltransferase At5g03795 transcript variant X1,	0.25405	0.107592	1.63076	co_expression
TCONS_00006367	0	0	0.849339	112192707	XM_024332557.1 Rosa chinensis probable glutathione S-transferase	0.189367	4.28775	29.4298	co_expression
TCONS_00006367	0	0	0.849339	112192730	XM_024332589.1 Rosa chinensis RING-H2 finger protein ATL5-like	0.013883	0.0588513	2.70665	co_expression
TCONS_00006367	0	0	0.849339	112192821	XM_024332703.1 Rosa chinensis thaumatin-like protein 1b	0.795831	1.60212	413.985	co_expression
TCONS_00006367	0	0	0.849339	112192856	XM_024332758.1 Rosa chinensis aquaporin PIP2-1-like	5.04519	21.3385	104.743	co_expression
TCONS_00006367	0	0	0.849339	112192865	XM_024332769.1 Rosa chinensis uncharacterized LOC112192865	16.6268	16.8154	62.5873	co_expression
TCONS_00006367	0	0	0.849339	112192999	XM_024332986.1 Rosa chinensis cytochrome P450 714C2-like	0.370572	0.437206	8.17331	co_expression
TCONS_00006367	0	0	0.849339	112193031	XM_024333040.1 Rosa chinensis glucan endo-1,3-beta-glucosidase-like	0.0354143	0.4039	14.6089	co_expression
TCONS_00006367	0	0	0.849339	112193303	XM_024333382.1 Rosa chinensis gibberellin 2-beta-dioxygenase 2	0	0.0493753	0.685867	co_expression
TCONS_00006367	0	0	0.849339	112193364	XM_024333483.1 Rosa chinensis DNA-directed RNA polymerase I subunit 2-like transcript variant X1,	0.0244703	0.040069	1.13348	co_expression
TCONS_00006367	0	0	0.849339	112193489	XM_024333661.1 Rosa chinensis glutamate decarboxylase 1	10.896	56.5826	463.755	co_expression
TCONS_00006367	0	0	0.849339	112193611	XM_024333814.1 Rosa chinensis probable LRR receptor-like serine/threonine-protein kinase At5g63710 transcript variant X1,	0.768482	1.66996	10.213	co_expression
TCONS_00006367	0	0	0.849339	112193923	XM_024334187.1 Rosa chinensis uncharacterized LOC112193923	1.1649	7.40299	30.8458	co_expression
TCONS_00006367	0	0	0.849339	112194063	XM_024334325.1 Rosa chinensis uncharacterized LOC112194063	0	0.0421237	0.392088	co_expression
TCONS_00006367	0	0	0.849339	112194080	XM_024334585.1 Rosa chinensis uncharacterized LOC112194080 transcript variant X1,	0.0659757	0.148029	5.03342	co_expression
TCONS_00006367	0	0	0.849339	112194158	XM_024334410.1 Rosa chinensis uncharacterized LOC112194158	0.024012	0.0193647	0.443806	co_expression
TCONS_00006367	0	0	0.849339	112194457	XM_024334694.1 Rosa chinensis ornithine decarboxylase-like	0	0.13215	8.3751	co_expression
TCONS_00006367	0	0	0.849339	112194523	XM_024334752.1 Rosa chinensis protein ALP1-like	0	0.0434067	2.41835	co_expression
TCONS_00006367	0	0	0.849339	112194770	XM_024334996.1 Rosa chinensis chymomexicain-like transcript variant X1,	0.0278267	0.518527	16.1858	co_expression
TCONS_00006367	0	0	0.849339	112194832	XM_024335071.1 Rosa chinensis chymomexicain-like transcript variant X1,	0.0360583	0.513085	15.0557	co_expression
TCONS_00006367	0	0	0.849339	112194853	XM_024335092.1 Rosa chinensis probable WRKY transcription factor 49	0	0	0.135948	co_expression
TCONS_00006367	0	0	0.849339	112195200	XM_024335567.1 Rosa chinensis uncharacterized LOC112195200	0	0	0.313657	co_expression
TCONS_00006367	0	0	0.849339	112195238	XM_024335613.1 Rosa chinensis uncharacterized LOC112195238	0.60026	0.740855	3.86531	co_expression
TCONS_00006367	0	0	0.849339	112195300	XM_024335707.1 Rosa chinensis WAT1-related protein At5g07050-like	2.92793	10.2657	66.0063	co_expression
TCONS_00006367	0	0	0.849339	112195370	XM_024335782.1 Rosa chinensis cationic peroxidase 1-like	0.565216	3.24887	77.9294	co_expression
TCONS_00006367	0	0	0.849339	112195787	XM_024335986.1 Rosa chinensis E3 ubiquitin-protein ligase RGLG2-like	0.015166	0.0222347	0.726875	co_expression
TCONS_00006367	0	0	0.849339	112195984	XM_024336244.1 Rosa chinensis sugar transport protein 13-like	0.163534	0.77899	22.4236	co_expression
TCONS_00006367	0	0	0.849339	112196137	XM_024336441.1 Rosa chinensis protein DMP2-like	3.73824	0.469909	21.659	co_expression
TCONS_00006367	0	0	0.849339	112196419	XM_024336772.1 Rosa chinensis homeobox protein knotted-1-like 1	0.045096	0	1.4153	co_expression
TCONS_00006367	0	0	0.849339	112196516	XM_024336884.1 Rosa chinensis GTP 3',8-cyclase, mitochondrial transcript variant X1,	5.81819	6.3781	13.5352	co_expression
TCONS_00006367	0	0	0.849339	112196740	XM_024337158.1 Rosa chinensis 1-aminocyclopropane-1-carboxylate oxidase homolog 1-like	0.428287	1.11234	9.71553	co_expression
TCONS_00006367	0	0	0.849339	112196951	XM_024337452.1 Rosa chinensis putative beta-D-xylosidase	10.3274	493.123	3829.23	co_expression
TCONS_00006367	0	0	0.849339	112196965	XM_024337471.1 Rosa chinensis pectinesterase	1.07191	39.6451	494.09	co_expression
TCONS_00006367	0	0	0.849339	112196971	XM_024337478.1 Rosa chinensis uncharacterized LOC112196971	0	0.0207587	1.10064	co_expression
TCONS_00006367	0	0	0.849339	112197239	XM_024337858.1 Rosa chinensis protein SIEVE ELEMENT OCCLUSION B-like	0.0174797	0.009056	0.380145	co_expression
TCONS_00006367	0	0	0.849339	112197429	XM_024338095.1 Rosa chinensis putative glutamine amidotransferase GAT1_2.1	0.605308	1.96328	22.398	co_expression
TCONS_00006367	0	0	0.849339	112197615	XM_024338357.1 Rosa chinensis aldehyde oxidase GLOX-like	0.058991	0.86831	9.31059	co_expression
TCONS_00006367	0	0	0.849339	112197900	XM_024338858.1 Rosa chinensis VAN3-binding protein	0.19957	9.65827	80.3516	co_expression
TCONS_00006367	0	0	0.849339	112198573	XM_024339728.1 Rosa chinensis U-box domain-containing protein 35-like	0	0.301126	2.95654	co_expression
TCONS_00006367	0	0	0.849339	112198728	XM_024339849.1 Rosa chinensis protein ALP1-like	0.0169983	0.00262033	1.55103	co_expression
TCONS_00006367	0	0	0.849339	112198731	XM_024339852.1 Rosa chinensis early nodulin-75-like	0.174314	0.117976	1.38978	co_expression
TCONS_00006367	0	0	0.849339	112199150	XM_024340211.1 Rosa chinensis receptor-like serine/threonine-protein kinase SD1-8	0	0.0151757	0.449581	co_expression
TCONS_00006367	0	0	0.849339	112199566	--	0.008312	0.0523803	0.786304	co_expression
TCONS_00006367	0	0	0.849339	112199792	--	0	0	0.14476	co_expression
TCONS_00006367	0	0	0.849339	112200123	XM_024341135.1 Rosa chinensis CASP-like protein 2C1	15.7281	29.2126	154.905	co_expression
TCONS_00006367	0	0	0.849339	112200143	XM_024341155.1 Rosa chinensis auxin-responsive protein IAA33	0.952814	0.187173	4.77993	co_expression
TCONS_00006367	0	0	0.849339	112200146	XM_024341162.1 Rosa chinensis homeobox-leucine zipper protein HAT22-like	0.114145	1.10329	15.1948	co_expression
TCONS_00006367	0	0	0.849339	112200201	XM_024341225.1 Rosa chinensis uncharacterized LOC112200201	1.13189	1.45715	10.6515	co_expression
TCONS_00006367	0	0	0.849339	112200247	XM_024341277.1 Rosa chinensis solute carrier family 35 member F1-like	2.91483	3.66376	8.37	co_expression
TCONS_00006367	0	0	0.849339	112200417	XM_024341449.1 Rosa chinensis protein PLANT CADMIUM RESISTANCE 2-like	0.593977	1.24812	8.50503	co_expression
TCONS_00006367	0	0	0.849339	112200742	XM_024341750.1 Rosa chinensis xanthohumol 4-O-methyltransferase-like	0	0	1.26392	co_expression
TCONS_00006367	0	0	0.849339	112200969	XM_024341978.1 Rosa chinensis cytochrome P450 CYP749A22-like	0.041878	0.648137	3.35609	co_expression
TCONS_00006367	0	0	0.849339	112200989	XM_024341996.1 Rosa chinensis putative glycine-rich cell wall structural protein 1 transcript variant X1,	0.505921	0.505992	4.3684	co_expression
TCONS_00006367	0	0	0.849339	112201620	XM_024342521.1 Rosa chinensis TMV resistance protein N-like transcript variant X1,	0.0553513	0.0192273	0.214468	co_expression
TCONS_00006367	0	0	0.849339	112201652	XM_024342564.1 Rosa chinensis 60S acidic ribosomal protein P2-like	0	0.107877	1.77979	co_expression
TCONS_00006367	0	0	0.849339	112201963	XM_024342890.1 Rosa chinensis glucan endo-1,3-beta-glucosidase-like	0.788142	5.44709	73.7872	co_expression
TCONS_00006367	0	0	0.849339	112201986	XM_024342910.1 Rosa chinensis indole-3-acetaldehyde oxidase-like	6.72834	4.42791	21.1967	co_expression
TCONS_00006367	0	0	0.849339	112202300	XM_024343245.1 Rosa chinensis nudix hydrolase 10-like transcript variant X1,	0.48179	5.41995	103.21	co_expression
TCONS_00006367	0	0	0.849339	112202340	XM_024343327.1 Rosa chinensis uncharacterized protein At2g29880-like	0.1095	0.129359	0.825428	co_expression
TCONS_00006367	0	0	0.849339	112202453	XM_024343465.1 Rosa chinensis scarecrow-like protein 14	0	0	0.029351	co_expression
TCONS_00006367	0	0	0.849339	112202547	XM_024343556.1 Rosa chinensis heavy metal-associated isoprenylated plant protein 29	0.374526	0.1606	3.79855	co_expression
TCONS_00006367	0	0	0.849339	112202738	XM_024343746.1 Rosa chinensis uncharacterized LOC112202738	0.0179697	0.0487787	0.257448	co_expression
TCONS_00006367	0	0	0.849339	112202800	XM_024343809.1 Rosa chinensis transcription factor bHLH30-like	1.0256	1.04732	7.16729	co_expression
TCONS_00006367	0	0	0.849339	112202833	XM_024343848.1 Rosa chinensis G-type lectin S-receptor-like serine/threonine-protein kinase SD1-1	0.024958	0.0214083	0.42497	co_expression
TCONS_00006367	0	0	0.849339	112203248	XM_024344241.1 Rosa chinensis receptor-like protein EIX2	0.00667233	0.021448	0.302788	co_expression
TCONS_00006367	0	0	0.849339	112203261	XM_024344251.1 Rosa chinensis receptor-like protein EIX2	0.0101277	0.0537513	0.424948	co_expression
TCONS_00006367	0	0	0.849339	112203959	XM_024344853.1 Rosa chinensis lupeol synthase-like	0	0	0.129943	co_expression
TCONS_00006367	0	0	0.849339	112203992	XM_024344881.1 Rosa chinensis nudix hydrolase 10-like	1.7701	7.0492	116.648	co_expression
TCONS_00007202	0.751919	0	0.157088	112163728	XM_024300003.1 Rosa chinensis uncharacterized LOC112163728	0.01044	0	0	co_expression
TCONS_00007202	0.751919	0	0.157088	112163852	XM_024300118.1 Rosa chinensis serpin-ZX-like	0.019934	0	0	co_expression
TCONS_00007202	0.751919	0	0.157088	112163863	XM_024300127.1 Rosa chinensis G-type lectin S-receptor-like serine/threonine-protein kinase At4g27290	0.0142267	0	0	co_expression
TCONS_00007202	0.751919	0	0.157088	112163916	XM_024300178.1 Rosa chinensis uncharacterized LOC112163916	28.6231	8.43075	6.2478	co_expression
TCONS_00007202	0.751919	0	0.157088	112163961	XM_024300215.1 Rosa chinensis uncharacterized LOC112163961	0.036888	0	0	co_expression
TCONS_00007202	0.751919	0	0.157088	112163971	XM_024300225.1 Rosa chinensis putative pentatricopeptide repeat-containing protein At1g12700, mitochondrial	1.43221	0.572805	0.708033	co_expression
TCONS_00007202	0.751919	0	0.157088	112163984	XM_024300235.1 Rosa chinensis putative serine/threonine-protein kinase-like protein CCR3	0.242028	0.0146257	0.008248	co_expression
TCONS_00007202	0.751919	0	0.157088	112164026	XM_024300270.1 Rosa chinensis ras-related protein RABC2a-like	0.00960067	0	0	co_expression
TCONS_00007202	0.751919	0	0.157088	112164064	--	0.0478727	0	0.015685	co_expression
TCONS_00007202	0.751919	0	0.157088	112164076	XM_024300316.1 Rosa chinensis uncharacterized LOC112164076	0.00604167	0	0	co_expression
TCONS_00007202	0.751919	0	0.157088	112164178	--	0.0156937	0	0	co_expression
TCONS_00007202	0.751919	0	0.157088	112164249	XM_024300472.1 Rosa chinensis uncharacterized LOC112164249	0.0170293	0	0	co_expression
TCONS_00007202	0.751919	0	0.157088	112164264	XM_024300484.1 Rosa chinensis uncharacterized LOC112164264	0.0286367	0	0	co_expression
TCONS_00007202	0.751919	0	0.157088	112164349	XM_024300558.1 Rosa chinensis uncharacterized LOC112164349	0.006641	0	0	co_expression
TCONS_00007202	0.751919	0	0.157088	112164387	--	0.0141603	0	0	co_expression
TCONS_00007202	0.751919	0	0.157088	112164446	XM_024300638.1 Rosa chinensis uncharacterized LOC112164446	0.0483877	0	0	co_expression
TCONS_00007202	0.751919	0	0.157088	112164517	XM_024300729.1 Rosa chinensis cytochrome P450 71D9-like	0.852773	0.197671	0.270105	co_expression
TCONS_00007202	0.751919	0	0.157088	112164543	XM_024300761.1 Rosa chinensis sodium/calcium exchanger NCL1-like	1.5943	0.0619723	0.401467	co_expression
TCONS_00007202	0.751919	0	0.157088	112164589	XM_024300827.1 Rosa chinensis pleiotropic drug resistance protein 2-like	37.4797	11.3303	13.356	co_expression
TCONS_00007202	0.751919	0	0.157088	112164643	XM_024300907.1 Rosa chinensis vesicle-associated protein 4-1-like	62.1516	15.4493	11.6188	co_expression
TCONS_00007202	0.751919	0	0.157088	112164672	XM_024300958.1 Rosa chinensis uncharacterized LOC112164672	0.488261	0.036155	0.0387793	co_expression
TCONS_00007202	0.751919	0	0.157088	112164868	XM_024301205.1 Rosa chinensis pyruvate kinase, cytosolic isozyme	244.922	67.8808	63.8548	co_expression
TCONS_00007202	0.751919	0	0.157088	112164953	XM_024301319.1 Rosa chinensis expansin-A12	14.1098	3.53248	5.65839	co_expression
TCONS_00007202	0.751919	0	0.157088	112164959	XM_024301327.1 Rosa chinensis probable lysine-specific demethylase JMJ14 transcript variant X1,	7.32651	4.04603	4.77296	co_expression
TCONS_00007202	0.751919	0	0.157088	112165264	XM_024301737.1 Rosa chinensis haloacid dehalogenase-like hydrolase domain-containing protein 3 transcript variant X1,	63.0989	2.91429	1.95855	co_expression
TCONS_00007202	0.751919	0	0.157088	112165481	XM_024302002.1 Rosa chinensis probable glutathione S-transferase	0.0202877	0	0	co_expression
TCONS_00007202	0.751919	0	0.157088	112165532	--	1.56688	0.419422	0.625994	co_expression
TCONS_00007202	0.751919	0	0.157088	112165729	XM_024302352.1 Rosa chinensis stem-specific protein TSJT1-like	654.369	18.4033	23.418	co_expression
TCONS_00007202	0.751919	0	0.157088	112165742	XM_024302367.1 Rosa chinensis uncharacterized LOC112165742 transcript variant X1,	5.44571	3.88651	3.29176	co_expression
TCONS_00007202	0.751919	0	0.157088	112165813	XM_024302482.1 Rosa chinensis putative pentatricopeptide repeat-containing protein At1g12700, mitochondrial transcript variant X1,	0.008499	0	0	co_expression
TCONS_00007202	0.751919	0	0.157088	112165870	XM_024302570.1 Rosa chinensis putative B3 domain-containing protein At5g58280	0.0425623	0	0	co_expression
TCONS_00007202	0.751919	0	0.157088	112165942	XM_024302656.1 Rosa chinensis 18.1 kDa class I heat shock protein-like	88.8641	6.92113	7.0268	co_expression
TCONS_00007202	0.751919	0	0.157088	112166028	XM_024302779.1 Rosa chinensis 18.1 kDa class I heat shock protein-like	25.2014	1.6248	1.70857	co_expression
TCONS_00007202	0.751919	0	0.157088	112166127	XM_024302897.1 Rosa chinensis uncharacterized LOC112166127	32.5865	2.62895	6.12583	co_expression
TCONS_00007202	0.751919	0	0.157088	112166188	XM_024302961.1 Rosa chinensis uncharacterized LOC112166188	120.693	0.981886	1.39256	co_expression
TCONS_00007202	0.751919	0	0.157088	112166206	--	0.0241507	0	0	co_expression
TCONS_00007202	0.751919	0	0.157088	112166240	XM_024303030.1 Rosa chinensis gibberellin 2-beta-dioxygenase 8-like	0.067353	0	0	co_expression
TCONS_00007202	0.751919	0	0.157088	112166470	XM_024303324.1 Rosa chinensis uncharacterized LOC112166470	0.224155	0.0777667	0.097041	co_expression
TCONS_00007202	0.751919	0	0.157088	112166493	XM_024303357.1 Rosa chinensis 18.1 kDa class I heat shock protein-like	10.3727	0.918139	0.851636	co_expression
TCONS_00007202	0.751919	0	0.157088	112166657	XM_024303534.1 Rosa chinensis F-box/kelch-repeat protein At3g23880-like	0.0114683	0	0	co_expression
TCONS_00007202	0.751919	0	0.157088	112166927	--	0.0537737	0.010339	0	co_expression
TCONS_00007202	0.751919	0	0.157088	112166975	XM_024303913.1 Rosa chinensis nudix hydrolase 14, chloroplastic-like	0.210891	0	0.0414553	co_expression
TCONS_00007202	0.751919	0	0.157088	112166990	XM_024303925.1 Rosa chinensis uncharacterized LOC112166990	0.0188457	0	0	co_expression
TCONS_00007202	0.751919	0	0.157088	112167156	XM_024304125.1 Rosa chinensis E3 SUMO-protein ligase SIZ1 transcript variant X1,	36.5091	19.4327	18.9593	co_expression
TCONS_00007202	0.751919	0	0.157088	112167197	XM_024304176.1 Rosa chinensis sodium/calcium exchanger NCL-like transcript variant X1,	0.0938833	0	0	co_expression
TCONS_00007202	0.751919	0	0.157088	112167545	XM_024304571.1 Rosa chinensis heavy metal-associated isoprenylated plant protein 47-like transcript variant X1,	0.0785443	0.0131807	0	co_expression
TCONS_00007202	0.751919	0	0.157088	112167669	--	0.022072	0	0	co_expression
TCONS_00007202	0.751919	0	0.157088	112167688	XM_024304730.1 Rosa chinensis uncharacterized LOC112167688 transcript variant X1,	0.25972	0	0.109156	co_expression
TCONS_00007202	0.751919	0	0.157088	112167797	XM_024304869.1 Rosa chinensis lysine-specific demethylase JMJ25-like transcript variant X1,	42.0676	8.08678	7.28383	co_expression
TCONS_00007202	0.751919	0	0.157088	112167803	XM_024304885.1 Rosa chinensis uncharacterized LOC112167803 transcript variant X1,	0.0617893	0	0	co_expression
TCONS_00007202	0.751919	0	0.157088	112167947	--	0.020783	0	0	co_expression
TCONS_00007202	0.751919	0	0.157088	112167993	XM_024305102.1 Rosa chinensis beta-glucosidase 12-like transcript variant X1,	4.97705	0.242219	0.424252	co_expression
TCONS_00007202	0.751919	0	0.157088	112168070	XM_024305187.1 Rosa chinensis spindle pole body component 110-like	0.0166453	0	0	co_expression
TCONS_00007202	0.751919	0	0.157088	112168079	XM_024305198.1 Rosa chinensis vicilin-like seed storage protein At2g28490	0.066413	0	0.011435	co_expression
TCONS_00007202	0.751919	0	0.157088	112168231	XM_024305356.1 Rosa chinensis serine/threonine-protein kinase RIO1-like	0.005287	0	0	co_expression
TCONS_00007202	0.751919	0	0.157088	112168320	XM_024305443.1 Rosa chinensis aluminum-activated malate transporter 2-like	0.0269723	0	0	co_expression
TCONS_00007202	0.751919	0	0.157088	112168340	XM_024305466.1 Rosa chinensis thioredoxin-like protein CXXS1	45.7577	1.45238	2.21989	co_expression
TCONS_00007202	0.751919	0	0.157088	112168346	XM_024305472.1 Rosa chinensis uncharacterized LOC112168346	0.0391507	0	0	co_expression
TCONS_00007202	0.751919	0	0.157088	112168489	XM_024305608.1 Rosa chinensis uncharacterized LOC112168489 transcript variant X1,	0.490244	0.15921	0.182552	co_expression
TCONS_00007202	0.751919	0	0.157088	112168734	--	0.198313	0	0.0213577	co_expression
TCONS_00007202	0.751919	0	0.157088	112168913	XM_024305845.1 Rosa chinensis protein LIFEGUARD 4-like	26.5705	12.4966	19.8484	co_expression
TCONS_00007202	0.751919	0	0.157088	112168915	XM_024305848.1 Rosa chinensis LOB domain-containing protein 39-like	26.2286	0.126546	2.39634	co_expression
TCONS_00007202	0.751919	0	0.157088	112168935	XM_024305870.1 Rosa chinensis uncharacterized protein At5g01610-like	0.742571	0.128004	0.205912	co_expression
TCONS_00007202	0.751919	0	0.157088	112169013	XM_024305949.1 Rosa chinensis 7-methylxanthosine synthase 1-like	0.0163013	0	0	co_expression
TCONS_00007202	0.751919	0	0.157088	112169076	XM_024306015.1 Rosa chinensis proline-rich protein 3-like	0.0182247	0	0	co_expression
TCONS_00007202	0.751919	0	0.157088	112169211	XM_024306205.1 Rosa chinensis squalene monooxygenase-like	0.562626	0	0.0684147	co_expression
TCONS_00007202	0.751919	0	0.157088	112169320	XM_024306335.1 Rosa chinensis UPF0481 protein At3g47200-like	1.17104	0.098539	0.256818	co_expression
TCONS_00007202	0.751919	0	0.157088	112169495	XM_024306532.1 Rosa chinensis ribosomal RNA small subunit methyltransferase NEP1-like	0.041799	0	0	co_expression
TCONS_00007202	0.751919	0	0.157088	112169533	XM_024306572.1 Rosa chinensis early light-induced protein 1, chloroplastic-like	46.9673	10.3317	23.9306	co_expression
TCONS_00007202	0.751919	0	0.157088	112169539	XM_024306578.1 Rosa chinensis egg cell-secreted protein 1.3-like	0.405346	0	0	co_expression
TCONS_00007202	0.751919	0	0.157088	112169544	XM_024306581.1 Rosa chinensis protein WEAK CHLOROPLAST MOVEMENT UNDER BLUE LIGHT 1-like transcript variant X1,	20.8299	16.7615	17.0978	co_expression
TCONS_00007202	0.751919	0	0.157088	112169638	XM_024306706.1 Rosa chinensis auxin-induced protein X15-like	0.296701	0	0	co_expression
TCONS_00007202	0.751919	0	0.157088	112169650	XM_024306717.1 Rosa chinensis 17.1 kDa class II heat shock protein-like	19.1626	0.214376	0.205781	co_expression
TCONS_00007202	0.751919	0	0.157088	112169661	XM_024306723.1 Rosa chinensis 2-oxoglutarate-dependent dioxygenase DAO-like	0.0467093	0	0	co_expression
TCONS_00007202	0.751919	0	0.157088	112169668	XM_024306728.1 Rosa chinensis UV-B-induced protein At3g17800, chloroplastic-like	38.3476	2.43598	6.25149	co_expression
TCONS_00007202	0.751919	0	0.157088	112169669	--	1.4775	0.0209457	0.334377	co_expression
TCONS_00007202	0.751919	0	0.157088	112169750	--	0.094552	0.00746067	0.0353337	co_expression
TCONS_00007202	0.751919	0	0.157088	112169793	--	0.0547497	0	0	co_expression
TCONS_00007202	0.751919	0	0.157088	112169839	XM_024306901.1 Rosa chinensis tyrosine--tRNA ligase 1, cytoplasmic-like	0.113292	0	0	co_expression
TCONS_00007202	0.751919	0	0.157088	112169994	XM_024307130.1 Rosa chinensis pentatricopeptide repeat-containing protein MRL1, chloroplastic transcript variant X1,	1.40615	0.298315	0.323152	co_expression
TCONS_00007202	0.751919	0	0.157088	112170029	XM_024307172.1 Rosa chinensis isoflavone 3'-hydroxylase-like	0.00416067	0	0	co_expression
TCONS_00007202	0.751919	0	0.157088	112170088	XM_024307233.1 Rosa chinensis uncharacterized LOC112170088	27.0581	20.4688	22.9684	co_expression
TCONS_00007202	0.751919	0	0.157088	112170102	XM_024307254.1 Rosa chinensis tyrosine--tRNA ligase 1, cytoplasmic-like	1.30518	0.0520753	0	co_expression
TCONS_00007202	0.751919	0	0.157088	112170164	XM_024307349.1 Rosa chinensis VAN3-binding protein transcript variant X1,	1.00089	0.0802283	0.229858	co_expression
TCONS_00007202	0.751919	0	0.157088	112170175	XM_024307365.1 Rosa chinensis uncharacterized LOC112170175	0.064355	0	0	co_expression
TCONS_00007202	0.751919	0	0.157088	112170212	XM_024307412.1 Rosa chinensis serine/arginine-rich-splicing factor SR34-like transcript variant X1,	31.9524	22.764	23.4236	co_expression
TCONS_00007202	0.751919	0	0.157088	112170288	XM_024307522.1 Rosa chinensis GDSL esterase/lipase At4g01130-like transcript variant X1,	0.27609	0	0.0185783	co_expression
TCONS_00007202	0.751919	0	0.157088	112170337	XM_024307596.1 Rosa chinensis uncharacterized LOC112170337	280.984	36.125	58.2781	co_expression
TCONS_00007202	0.751919	0	0.157088	112170365	--	0.0382797	0	0	co_expression
TCONS_00007202	0.751919	0	0.157088	112170434	XM_024307728.1 Rosa chinensis uncharacterized LOC112170434	0.548063	0.0964713	0.11543	co_expression
TCONS_00007202	0.751919	0	0.157088	112170623	XM_024307967.1 Rosa chinensis uncharacterized LOC112170623	0.31738	0	0.0204483	co_expression
TCONS_00007202	0.751919	0	0.157088	112170628	XM_024307971.1 Rosa chinensis non-functional pseudokinase ZED1-like	0.019431	0	0	co_expression
TCONS_00007202	0.751919	0	0.157088	112170641	XM_024307981.1 Rosa chinensis GDSL esterase/lipase At1g71250	0.0363897	0	0	co_expression
TCONS_00007202	0.751919	0	0.157088	112170738	XM_024308047.1 Rosa chinensis tricyclene synthase TPS4, chloroplastic-like	0.00946867	0	0	co_expression
TCONS_00007202	0.751919	0	0.157088	112170784	XM_024308084.1 Rosa chinensis uncharacterized LOC112170784	0.00157533	0	0	co_expression
TCONS_00007202	0.751919	0	0.157088	112170852	XM_024308137.1 Rosa chinensis putative nuclease HARBI1	0.599613	0.00440533	0.0368767	co_expression
TCONS_00007202	0.751919	0	0.157088	112170871	XM_024308153.1 Rosa chinensis F-box/kelch-repeat protein At3g06240-like	0.0136647	0	0	co_expression
TCONS_00007202	0.751919	0	0.157088	112170906	XM_024308176.1 Rosa chinensis uncharacterized LOC112170906	0.40802	0.030157	0.0173713	co_expression
TCONS_00007202	0.751919	0	0.157088	112170913	XM_024308184.1 Rosa chinensis uncharacterized LOC112170913	0.0520067	0	0	co_expression
TCONS_00007202	0.751919	0	0.157088	112170965	XM_024308227.1 Rosa chinensis zinc finger MYM-type protein 1-like	0.0773057	0.0150263	0.0420063	co_expression
TCONS_00007202	0.751919	0	0.157088	112171008	XM_024308255.1 Rosa chinensis uncharacterized LOC112171008	0.00733233	0	0	co_expression
TCONS_00007202	0.751919	0	0.157088	112171085	--	0.150482	0	0	co_expression
TCONS_00007202	0.751919	0	0.157088	112171130	XM_024308359.1 Rosa chinensis uncharacterized LOC112171130	0.466284	0	0	co_expression
TCONS_00007202	0.751919	0	0.157088	112171151	XM_024308377.1 Rosa chinensis uncharacterized LOC112171151	0.0176263	0	0	co_expression
TCONS_00007202	0.751919	0	0.157088	112171169	XM_024308393.1 Rosa chinensis uncharacterized LOC112171169	0.00945333	0	0	co_expression
TCONS_00007202	0.751919	0	0.157088	112171197	XM_024308415.1 Rosa chinensis TMV resistance protein N-like transcript variant X1,	6.90882	1.37538	3.96018	co_expression
TCONS_00007202	0.751919	0	0.157088	112171202	XM_024308418.1 Rosa chinensis uncharacterized LOC112171202	0.0530363	0	0	co_expression
TCONS_00007202	0.751919	0	0.157088	112171301	XM_024308504.1 Rosa chinensis uncharacterized LOC112171301	0.0301953	0	0	co_expression
TCONS_00007202	0.751919	0	0.157088	112171351	XM_024308549.1 Rosa chinensis uncharacterized LOC112171351	0.024224	0	0	co_expression
TCONS_00007202	0.751919	0	0.157088	112171400	XM_024308592.1 Rosa chinensis cyclic nucleotide-gated ion channel 2-like	0.0252187	0	0	co_expression
TCONS_00007202	0.751919	0	0.157088	112171438	XM_024308622.1 Rosa chinensis uncharacterized LOC112171438	0.566343	0	0	co_expression
TCONS_00007202	0.751919	0	0.157088	112171456	XM_024308638.1 Rosa chinensis uncharacterized LOC112171456	0.00390267	0	0	co_expression
TCONS_00007202	0.751919	0	0.157088	112171469	--	1.15465	0.247574	0.403686	co_expression
TCONS_00007202	0.751919	0	0.157088	112171565	XM_024308726.1 Rosa chinensis uncharacterized LOC112171565	0.430153	0.0215167	0.0440433	co_expression
TCONS_00007202	0.751919	0	0.157088	112171583	XM_024308745.1 Rosa chinensis uncharacterized LOC112171583	0.122147	0	0	co_expression
TCONS_00007202	0.751919	0	0.157088	112171589	XM_024308749.1 Rosa chinensis uncharacterized LOC112171589	0.836559	0.043641	0.125451	co_expression
TCONS_00007202	0.751919	0	0.157088	112171619	XM_024308778.1 Rosa chinensis uncharacterized LOC112171619	0.00334967	0	0	co_expression
TCONS_00007202	0.751919	0	0.157088	112171654	XM_024308805.1 Rosa chinensis putative zinc finger A20 and AN1 domain-containing stress-associated protein 8	0.279879	0	0	co_expression
TCONS_00007202	0.751919	0	0.157088	112171683	XM_024308829.1 Rosa chinensis RNA-dependent RNA polymerase 6-like	0.0200643	0	0	co_expression
TCONS_00007202	0.751919	0	0.157088	112171719	XM_024308858.1 Rosa chinensis zinc finger protein CONSTANS-LIKE 4-like	0.228695	0	0	co_expression
TCONS_00007202	0.751919	0	0.157088	112171767	XM_024308899.1 Rosa chinensis pollen receptor-like kinase 1	0.0266033	0	0	co_expression
TCONS_00007202	0.751919	0	0.157088	112171771	--	0.0376443	0	0	co_expression
TCONS_00007202	0.751919	0	0.157088	112171871	XM_024308997.1 Rosa chinensis probable prolyl 4-hydroxylase 3	27.7594	8.43554	9.5773	co_expression
TCONS_00007202	0.751919	0	0.157088	112171942	XM_024309065.1 Rosa chinensis protein NRT1/ PTR FAMILY 5.2-like	0.090063	0	0	co_expression
TCONS_00007202	0.751919	0	0.157088	112172044	XM_024309208.1 Rosa chinensis chaperone protein ClpB4, mitochondrial	13.7989	1.7647	1.18505	co_expression
TCONS_00007202	0.751919	0	0.157088	112172108	XM_024309295.1 Rosa chinensis ATP-dependent 6-phosphofructokinase 6	160.38	3.53075	9.40079	co_expression
TCONS_00007202	0.751919	0	0.157088	112172201	XM_024309448.1 Rosa chinensis zinc finger CCCH domain-containing protein 20-like	102.733	2.54491	6.89487	co_expression
TCONS_00007202	0.751919	0	0.157088	112172389	--	0.0148667	0	0	co_expression
TCONS_00007202	0.751919	0	0.157088	112172648	XM_024310070.1 Rosa chinensis E3 ubiquitin protein ligase DRIP2 transcript variant X1,	5.8384	1.79504	2.6632	co_expression
TCONS_00007202	0.751919	0	0.157088	112172731	XM_024310202.1 Rosa chinensis putative zinc finger A20 and AN1 domain-containing stress-associated protein 8	0.042335	0	0	co_expression
TCONS_00007202	0.751919	0	0.157088	112172827	XM_024310318.1 Rosa chinensis stearoyl-[acyl-carrier-protein] 9-desaturase 6, chloroplastic	47.6949	0.076332	0.0724493	co_expression
TCONS_00007202	0.751919	0	0.157088	112172869	--	0.302891	0	0.010862	co_expression
TCONS_00007202	0.751919	0	0.157088	112172878	XM_024310374.1 Rosa chinensis two-on-two hemoglobin-3	38.8835	5.41385	1.30966	co_expression
TCONS_00007202	0.751919	0	0.157088	112172904	XM_024310408.1 Rosa chinensis aspartate--tRNA ligase 2, cytoplasmic	53.7214	24.6134	35.9972	co_expression
TCONS_00007202	0.751919	0	0.157088	112172954	XM_024310477.1 Rosa chinensis uncharacterized LOC112172954	0.0312407	0	0	co_expression
TCONS_00007202	0.751919	0	0.157088	112172990	XM_024310527.1 Rosa chinensis BTB/POZ domain-containing protein At3g05675-like	24.9994	12.4698	15.522	co_expression
TCONS_00007202	0.751919	0	0.157088	112172995	XM_024310537.1 Rosa chinensis protein PLANT CADMIUM RESISTANCE 2-like	0.0676537	0	0	co_expression
TCONS_00007202	0.751919	0	0.157088	112173010	XM_024310553.1 Rosa chinensis uncharacterized LOC112173010	8.00401	1.7597	4.01847	co_expression
TCONS_00007202	0.751919	0	0.157088	112173031	--	0.0272707	0	0	co_expression
TCONS_00007202	0.751919	0	0.157088	112173057	XM_024310600.1 Rosa chinensis cytochrome P450 94A1-like	0.200193	0.0170597	0.0468097	co_expression
TCONS_00007202	0.751919	0	0.157088	112173100	XM_024310650.1 Rosa chinensis F-box/FBD/LRR-repeat protein At1g13570-like	1.02706	0.204052	0.235381	co_expression
TCONS_00007202	0.751919	0	0.157088	112173331	XM_024310944.1 Rosa chinensis VAN3-binding protein	0.0356823	0	0	co_expression
TCONS_00007202	0.751919	0	0.157088	112173399	XM_024311013.1 Rosa chinensis CCG-binding protein 1	366.563	12.5232	39.4586	co_expression
TCONS_00007202	0.751919	0	0.157088	112173466	--	0.0559083	0	0	co_expression
TCONS_00007202	0.751919	0	0.157088	112173505	XM_024311143.1 Rosa chinensis small heat shock protein, chloroplastic	3.76307	0.0308407	0	co_expression
TCONS_00007202	0.751919	0	0.157088	112173583	XM_024311245.1 Rosa chinensis uncharacterized protein At5g39865	26.5135	17.9018	19.3622	co_expression
TCONS_00007202	0.751919	0	0.157088	112173624	XM_024311309.1 Rosa chinensis calcium uptake protein, mitochondrial	45.9864	19.0009	26.0242	co_expression
TCONS_00007202	0.751919	0	0.157088	112173699	XM_024311378.1 Rosa chinensis LOB domain-containing protein 22-like	0.037854	0	0	co_expression
TCONS_00007202	0.751919	0	0.157088	112173742	XM_024311426.1 Rosa chinensis uncharacterized LOC112173742	0.0128687	0	0	co_expression
TCONS_00007202	0.751919	0	0.157088	112173749	XM_024311433.1 Rosa chinensis protein SCARECROW-like	0.153769	0	0	co_expression
TCONS_00007202	0.751919	0	0.157088	112173796	XM_024311480.1 Rosa chinensis alcohol dehydrogenase-like transcript variant X1,	627.062	3.66874	12.0829	co_expression
TCONS_00007202	0.751919	0	0.157088	112173798	XM_024311482.1 Rosa chinensis alcohol dehydrogenase-like transcript variant X1,	57.1672	0.546088	0.647995	co_expression
TCONS_00007202	0.751919	0	0.157088	112173799	XM_024311484.1 Rosa chinensis alcohol dehydrogenase 3-like	29.7253	0.457944	0.103493	co_expression
TCONS_00007202	0.751919	0	0.157088	112173803	--	1.97719	0	0	co_expression
TCONS_00007202	0.751919	0	0.157088	112173851	--	0.0646523	0	0.0160723	co_expression
TCONS_00007202	0.751919	0	0.157088	112173993	XM_024311678.1 Rosa chinensis small ubiquitin-related modifier 1-like	14.8707	4.13963	5.78177	co_expression
TCONS_00007202	0.751919	0	0.157088	112174002	XM_024311688.1 Rosa chinensis uncharacterized LOC112174002	0.966197	0	0.107213	co_expression
TCONS_00007202	0.751919	0	0.157088	112174114	XM_024311816.1 Rosa chinensis probable prefoldin subunit 5	0.708951	0.147597	0.198865	co_expression
TCONS_00007202	0.751919	0	0.157088	112174148	XM_024311864.1 Rosa chinensis topless-related protein 2-like transcript variant X1,	0.0118287	0	0	co_expression
TCONS_00007202	0.751919	0	0.157088	112174164	XM_024311894.1 Rosa chinensis TMV resistance protein N-like	0.074824	0	0.014156	co_expression
TCONS_00007202	0.751919	0	0.157088	112174199	XM_024311938.1 Rosa chinensis subtilisin-like protease SBT1.2	0.0103477	0	0.00157867	co_expression
TCONS_00007202	0.751919	0	0.157088	112174257	XM_024311991.1 Rosa chinensis probable glycosyltransferase At5g03795 transcript variant X1,	0.142009	0	0.00878167	co_expression
TCONS_00007202	0.751919	0	0.157088	112174297	XM_024312042.1 Rosa chinensis plasma membrane ATPase 1-like	0.65663	0.0186847	0.0560033	co_expression
TCONS_00007202	0.751919	0	0.157088	112174428	XM_024312199.1 Rosa chinensis ethylene-responsive transcription factor ERF071	234.42	0.937203	3.95857	co_expression
TCONS_00007202	0.751919	0	0.157088	112174501	XM_024312279.1 Rosa chinensis alcohol dehydrogenase	521.197	5.04106	5.2359	co_expression
TCONS_00007202	0.751919	0	0.157088	112174516	XM_024312296.1 Rosa chinensis uncharacterized LOC112174516	0.075329	0	0	co_expression
TCONS_00007202	0.751919	0	0.157088	112174527	XM_024312312.1 Rosa chinensis proline-rich protein 1-like	7.55406	0.013053	0	co_expression
TCONS_00007202	0.751919	0	0.157088	112174610	XM_024312413.1 Rosa chinensis annexin B11	0.524555	0.0188183	0.174953	co_expression
TCONS_00007202	0.751919	0	0.157088	112174689	XM_024312486.1 Rosa chinensis uncharacterized LOC112174689	30.0319	2.14949	5.36113	co_expression
TCONS_00007202	0.751919	0	0.157088	112174690	XM_024312487.1 Rosa chinensis E3 ubiquitin ligase PARAQUAT TOLERANCE 3-like transcript variant X2,	20.1	16.4715	17.5611	co_expression
TCONS_00007202	0.751919	0	0.157088	112174749	XM_024312542.1 Rosa chinensis universal stress protein PHOS34	524.034	275.118	337.443	co_expression
TCONS_00007202	0.751919	0	0.157088	112174783	XM_024312593.1 Rosa chinensis heat shock factor protein HSF30 transcript variant X2,	20.8875	0.444704	0.361904	co_expression
TCONS_00007202	0.751919	0	0.157088	112174814	XM_024312625.1 Rosa chinensis uncharacterized protein At2g29880-like transcript variant X1,	2.00671	0.0604483	0.079259	co_expression
TCONS_00007202	0.751919	0	0.157088	112174842	XM_024312659.1 Rosa chinensis probable hydroxyacylglutathione hydrolase 2, chloroplastic transcript variant X1,	0.0352457	0	0.008633	co_expression
TCONS_00007202	0.751919	0	0.157088	112175071	XM_024312735.1 Rosa chinensis putative B3 domain-containing protein Os04g0346900	0.156241	0	0.00947967	co_expression
TCONS_00007202	0.751919	0	0.157088	112175222	XM_024312875.1 Rosa chinensis protein disulfide isomerase-like 1-6	0.208319	0	0.0484597	co_expression
TCONS_00007202	0.751919	0	0.157088	112175315	XM_024312989.1 Rosa chinensis putative RING-H2 finger protein ATL35	0.0417023	0	0	co_expression
TCONS_00007202	0.751919	0	0.157088	112175470	XM_024313147.1 Rosa chinensis universal stress protein PHOS34	93.6634	11.2679	7.96412	co_expression
TCONS_00007202	0.751919	0	0.157088	112175498	XM_024313172.1 Rosa chinensis mitogen-activated protein kinase kinase 10	0.222745	0	0.018339	co_expression
TCONS_00007202	0.751919	0	0.157088	112175555	XM_024313243.1 Rosa chinensis WAT1-related protein At2g39510-like	0.164585	0	0	co_expression
TCONS_00007202	0.751919	0	0.157088	112175750	XM_024313487.1 Rosa chinensis dammarenediol 12-hydroxylase-like	0.0400217	0	0	co_expression
TCONS_00007202	0.751919	0	0.157088	112175859	--	0.0806503	0.00569867	0.004489	co_expression
TCONS_00007202	0.751919	0	0.157088	112176064	--	0.310611	0.0129363	0.160655	co_expression
TCONS_00007202	0.751919	0	0.157088	112176084	XM_024313902.1 Rosa chinensis G-type lectin S-receptor-like serine/threonine-protein kinase At5g35370	0.656165	0.140187	0.295601	co_expression
TCONS_00007202	0.751919	0	0.157088	112176134	XM_024313960.1 Rosa chinensis uncharacterized LOC112176134	254.941	24.7849	22.4756	co_expression
TCONS_00007202	0.751919	0	0.157088	112176256	XM_024314091.1 Rosa chinensis uncharacterized LOC112176256 transcript variant X1,	27.0282	13.153	14.7446	co_expression
TCONS_00007202	0.751919	0	0.157088	112176258	XM_024314094.1 Rosa chinensis transport and Golgi organization 2 homolog transcript variant X1,	232.969	3.95464	4.46526	co_expression
TCONS_00007202	0.751919	0	0.157088	112176259	XM_024314096.1 Rosa chinensis uncharacterized LOC112176259	8.57137	0	0.015634	co_expression
TCONS_00007202	0.751919	0	0.157088	112176276	XM_024314118.1 Rosa chinensis pentatricopeptide repeat-containing protein At2g03880, mitochondrial	0.400171	0.0426603	0.086588	co_expression
TCONS_00007202	0.751919	0	0.157088	112176466	XM_024314404.1 Rosa chinensis uncharacterized LOC112176466	1.64858	0.144876	0.0869467	co_expression
TCONS_00007202	0.751919	0	0.157088	112176604	XM_024314613.1 Rosa chinensis chaperone protein ClpB1 transcript variant X1,	157.316	29.9567	6.26689	co_expression
TCONS_00007202	0.751919	0	0.157088	112176605	XM_024314616.1 Rosa chinensis chaperone protein ClpB1-like	23.7572	5.17022	1.16555	co_expression
TCONS_00007202	0.751919	0	0.157088	112176725	XM_024314784.1 Rosa chinensis probable inactive poly [ADP-ribose] polymerase SRO5 transcript variant X1,	120.37	36.8433	53.507	co_expression
TCONS_00007202	0.751919	0	0.157088	112176900	XM_024315030.1 Rosa chinensis uncharacterized LOC112176900 transcript variant X1,	7.66806	4.02292	3.57258	co_expression
TCONS_00007202	0.751919	0	0.157088	112176967	XM_024315112.1 Rosa chinensis glutathione S-transferase T1-like	0.238849	0	0.0494133	co_expression
TCONS_00007202	0.751919	0	0.157088	112177064	XM_024315244.1 Rosa chinensis FAM10 family protein At4g22670 transcript variant X1,	302.399	95.5699	75.0691	co_expression
TCONS_00007202	0.751919	0	0.157088	112177085	XM_024315280.1 Rosa chinensis zinc finger CCCH domain-containing protein 40-like	0.015087	0	0	co_expression
TCONS_00007202	0.751919	0	0.157088	112177087	XM_024315282.1 Rosa chinensis plant cysteine oxidase 3	6.79282	1.08557	2.45862	co_expression
TCONS_00007202	0.751919	0	0.157088	112177091	XM_024315289.1 Rosa chinensis uncharacterized LOC112177091	10.0959	0.586041	1.25623	co_expression
TCONS_00007202	0.751919	0	0.157088	112177216	XM_024315482.1 Rosa chinensis ABC transporter B family member 2-like	17.0934	1.35766	2.33744	co_expression
TCONS_00007202	0.751919	0	0.157088	112177244	XM_024315536.1 Rosa chinensis protein DMR6-LIKE OXYGENASE 2-like	0.082463	0	0	co_expression
TCONS_00007202	0.751919	0	0.157088	112177290	XM_024315591.1 Rosa chinensis uncharacterized LOC112177290	0.36789	0	0	co_expression
TCONS_00007202	0.751919	0	0.157088	112177348	XM_024315645.1 Rosa chinensis RNA polymerase II C-terminal domain phosphatase-like 4	2.55975	0.844944	1.06648	co_expression
TCONS_00007202	0.751919	0	0.157088	112177359	--	0.024163	0	0	co_expression
TCONS_00007202	0.751919	0	0.157088	112177385	XM_024315681.1 Rosa chinensis protein DA1-like	0.0583407	0	0	co_expression
TCONS_00007202	0.751919	0	0.157088	112177400	--	0.340165	0.0336827	0.0787847	co_expression
TCONS_00007202	0.751919	0	0.157088	112177450	XM_024315738.1 Rosa chinensis uncharacterized LOC112177450	0.039611	0	0	co_expression
TCONS_00007202	0.751919	0	0.157088	112177460	--	0.0198043	0	0	co_expression
TCONS_00007202	0.751919	0	0.157088	112177468	XM_024315758.1 Rosa chinensis uncharacterized LOC112177468	0.0231527	0	0	co_expression
TCONS_00007202	0.751919	0	0.157088	112177562	XM_024315842.1 Rosa chinensis uncharacterized LOC112177562	0.336254	0.013974	0.0641547	co_expression
TCONS_00007202	0.751919	0	0.157088	112177598	XM_024315880.1 Rosa chinensis uncharacterized LOC112177598	0.0103117	0	0	co_expression
TCONS_00007202	0.751919	0	0.157088	112177605	XM_024315888.1 Rosa chinensis uncharacterized LOC112177605	0.109497	0.00990367	0.008784	co_expression
TCONS_00007202	0.751919	0	0.157088	112177690	--	0.00794533	0	0	co_expression
TCONS_00007202	0.751919	0	0.157088	112177847	XM_024316095.1 Rosa chinensis uncharacterized LOC112177847	0.00313467	0	0	co_expression
TCONS_00007202	0.751919	0	0.157088	112177925	XM_024316162.1 Rosa chinensis uncharacterized LOC112177925	0.0365117	0	0	co_expression
TCONS_00007202	0.751919	0	0.157088	112177949	XM_024316187.1 Rosa chinensis uncharacterized LOC112177949	0.0491627	0	0	co_expression
TCONS_00007202	0.751919	0	0.157088	112178056	XM_024316272.1 Rosa chinensis uncharacterized LOC112178056	0.198162	0.0280857	0.0282443	co_expression
TCONS_00007202	0.751919	0	0.157088	112178057	XM_024316273.1 Rosa chinensis laccase-14-like	0.0110803	0	0	co_expression
TCONS_00007202	0.751919	0	0.157088	112178138	XM_024316334.1 Rosa chinensis uncharacterized LOC112178138	0.678637	0	0.0260523	co_expression
[truncated: 63,569 more rows]
